# Supplementary material for: BRAFV600E cooperates with CDX2 inactivation to promote serrated colorectal tumorigenesis
Source: eLife journal article supplement (doi:10.7554/elife.20331), 2017-01-10
Supplement: supp [file elife-20331-supp-v1.zip]

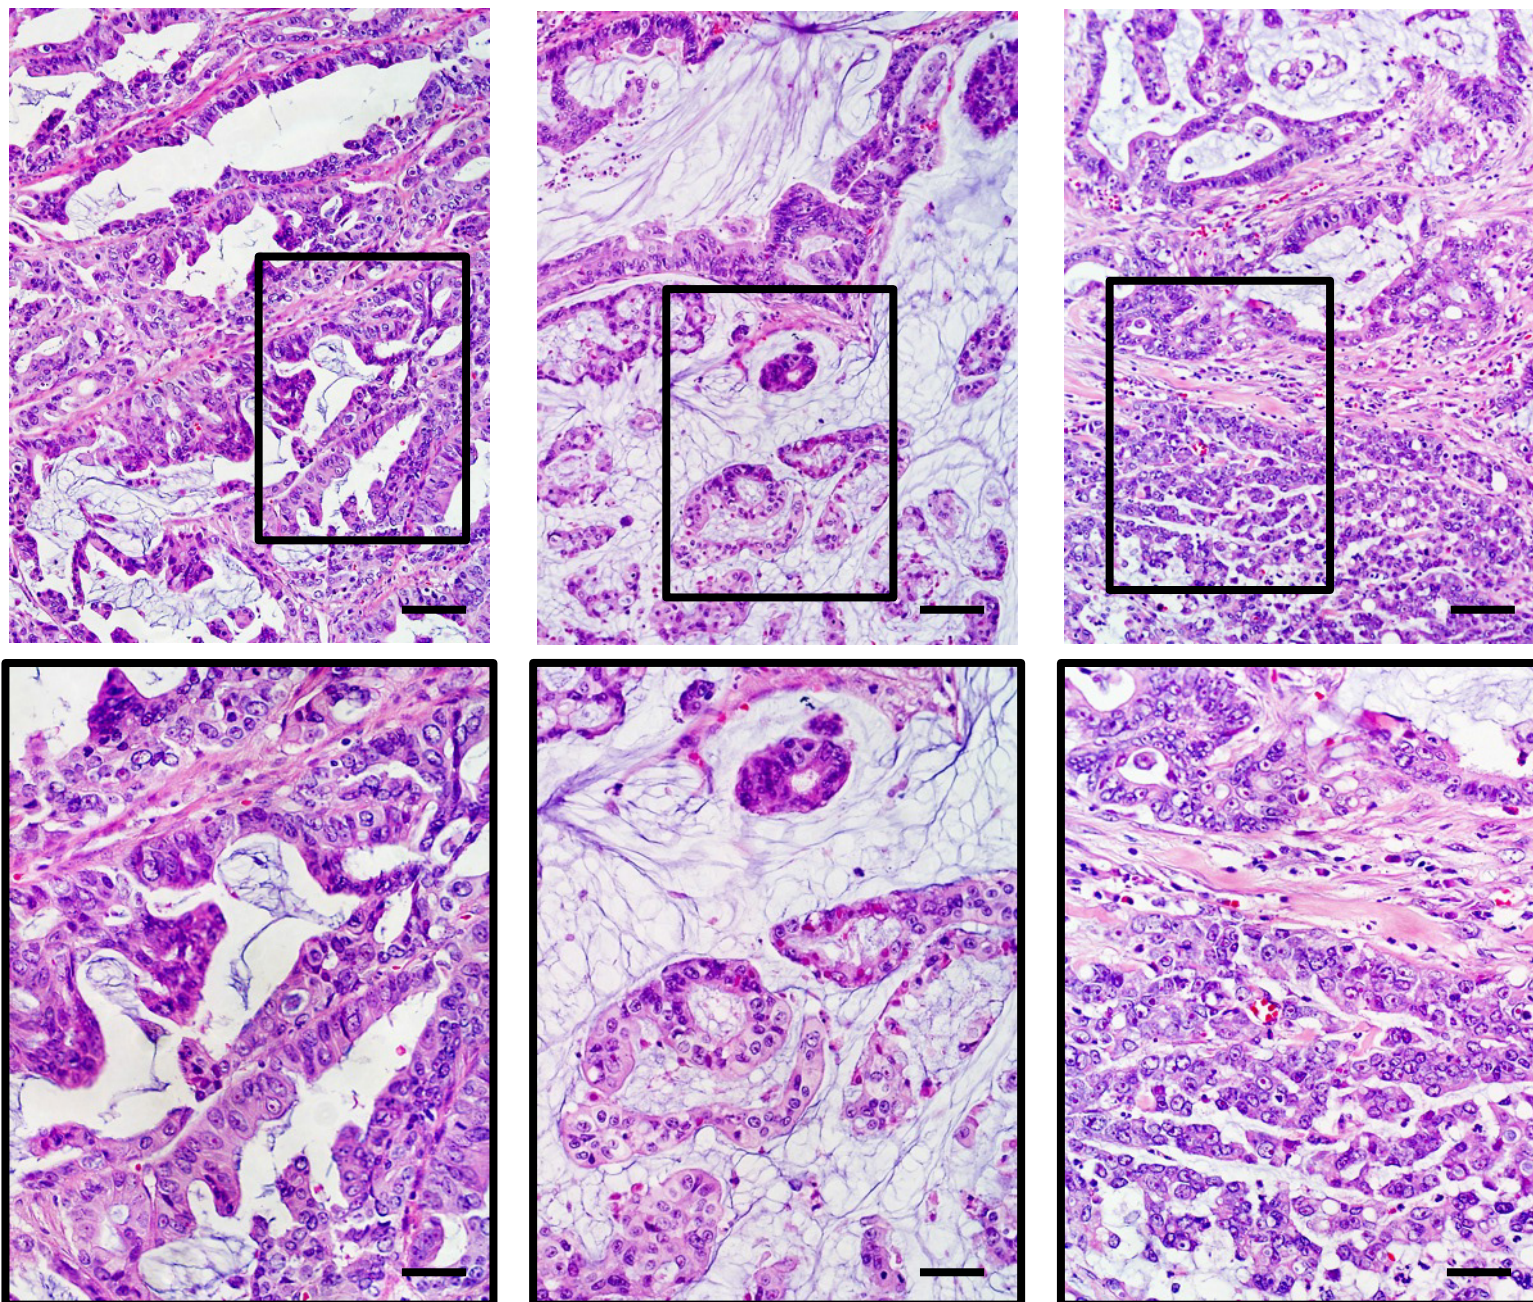

**Serrated CRC-  
Serrated pattern**

**Serrated CRC-  
Mucinous pattern**

**Serrated CRC-  
Trabecular pattern**
