# Supplementary material for: BRAFV600E cooperates with CDX2 inactivation to promote serrated colorectal tumorigenesis
Source: eLife journal article supplement (doi:10.7554/elife.20331), 2017-01-10
Supplement: supp [file elife-20331-supp-v1.zip]

Archive with 18 entries (18 files):
- elife_poa_e20331_Figure_5_source_data_1.xlsx
- elife_poa_e20331_Figure_5_source_data_3.xlsx
- elife_poa_e20331_FIgure_1_figure_supplement_2.pdf
- elife_poa_e20331_Table_2_source_data_1.xlsx
- elife_poa_e20331_Figure_3_figure_supplement_2_source_data_1.xlsx
- elife_poa_e20331_Figure_2_source_data_1.xls
- elife_poa_e20331_Figure_1_figure_supplement_1.pdf
- elife_poa_e20331_Figure_2_figure_supplement_1.pdf
- elife_poa_e20331_Figure_6_source_data_1.docx
- elife_poa_e20331_Figure_3_figure_supplement_1.pdf
- elife_poa_e20331_Figure_2_source_data_2.docx
- elife_poa_e20331_Supplementary_File_1.docx
- elife_poa_e20331_Figure_8_source_data_1.xlsx
- elife_poa_e20331_Figure_1_source_data_1.docx
- elife_poa_e20331_Figure_5_source_data_2.docx
- elife_poa_e20331_Figure_3_figure_supplement_2.pdf
- elife_poa_e20331_Figure_6_figure_supplement_1.pdf
- elife_poa_e20331_Figure_8_figure_supplement_1.pdf
