# Supplementary material for: BRAFV600E cooperates with CDX2 inactivation to promote serrated colorectal tumorigenesis
Source: eLife journal article supplement (doi:10.7554/elife.20331), 2017-01-10
Supplement: supp [file elife-20331-supp-v1.zip › elife_poa_e20331_Figure_2_source_data_1.xls]

## Sheet: Two groups
Days elapsed	Cdx2-/- Braf V600E	Cdx2 -/-	Braf V600E	Apc+/- Cdx2 -/- Braf V600E
69	1
103	1
143	1
171	1
76	1
130	1
71	1
385		1
480		0
480		0
480		0
480		0
480		0
286			1
480			0
480			0
480			0
480			0
114				1
85				1
181				1
171				1
158				1

## Sheet: Cdx2Braf vs Cdx2
Comparison of Survival Curves
Log-rank (Mantel-Cox) test
Chi square	12.64
df	1
P value	0.0004
P value summary	***
Are the survival curves sig different?	Yes
Gehan-Breslow-Wilcoxon test
Chi square	10.5
df	1
P value	0.0012
P value summary	**
Are the survival curves sig different?	Yes
Median survival
Cdx2-/- Braf V600E	103
Cdx2 -/-	Undefined
Hazard Ratio (Mantel-Haenszel)
Ratio (and its reciprocal)	17.9	0.05587
95% CI of ratio	3.648 to 87.81	0.01139 to 0.2741
Hazard Ratio (logrank)
Ratio (and its reciprocal)	14.38	0.06954
95% CI of ratio	4.088 to 78.37	0.01276 to 0.2446

## Sheet: Cdx2Braf vs Braf
Comparison of Survival Curves
Log-rank (Mantel-Cox) test
Chi square	10.74
df	1
P value	0.0011
P value summary	**
Are the survival curves sig different?	Yes
Gehan-Breslow-Wilcoxon test
Chi square	8.75
df	1
P value	0.0031
P value summary	**
Are the survival curves sig different?	Yes
Median survival
Cdx2-/- Braf V600E	103
Braf V600E	Undefined
Hazard Ratio (Mantel-Haenszel)
Ratio (and its reciprocal)	13.72	0.07288
95% CI of ratio	2.864 to 65.73	0.01521 to 0.3491
Hazard Ratio (logrank)
Ratio (and its reciprocal)	12.31	0.08126
95% CI of ratio	3.246 to 58.00	0.01724 to 0.3080

## Sheet: Cdx2Braf vs ApcCdx2Braf
Comparison of Survival Curves
Log-rank (Mantel-Cox) test
Chi square	1.997
df	1
P value	0.1576
P value summary	ns
Are the survival curves sig different?	No
Gehan-Breslow-Wilcoxon test
Chi square	2.051
df	1
P value	0.1521
P value summary	ns
Are the survival curves sig different?	No
Median survival
Cdx2-/- Braf V600E	103
Apc+/- Cdx2 -/- Braf V600E	158
Ratio (and its reciprocal)	0.6519	1.534
95% CI of ratio	0.2069 to 2.054	0.4869 to 4.833
Hazard Ratio (Mantel-Haenszel)
Ratio (and its reciprocal)	2.498	0.4003
95% CI of ratio	0.7018 to 8.895	0.1124 to 1.425
Hazard Ratio (logrank)
Ratio (and its reciprocal)	2.087	0.4793
95% CI of ratio	0.7878 to 7.924	0.1262 to 1.269

## Sheet: ApcCdx2Braf vs Braf
Comparison of Survival Curves
Log-rank (Mantel-Cox) test
Chi square	9.701
df	1
P value	0.0018
P value summary	**
Are the survival curves sig different?	Yes
Gehan-Breslow-Wilcoxon test
Chi square	8.333
df	1
P value	0.0039
P value summary	**
Are the survival curves sig different?	Yes
Median survival
Braf V600E	Undefined
Apc+/- Cdx2 -/- Braf V600E	158
Hazard Ratio (Mantel-Haenszel)
Ratio (and its reciprocal)	0.04954	20.19
95% CI of ratio	0.007476 to 0.3282	3.046 to 133.8
Hazard Ratio (logrank)
Ratio (and its reciprocal)	0.08381	11.93
95% CI of ratio	0.008573 to 0.2862	3.494 to 116.6

## Sheet: ApcCdx2Braf vs Cdx2
Comparison of Survival Curves
Log-rank (Mantel-Cox) test
Chi square	11.46
df	1
P value	0.0007
P value summary	***
Are the survival curves sig different?	Yes
Gehan-Breslow-Wilcoxon test
Chi square	10
df	1
P value	0.0016
P value summary	**
Are the survival curves sig different?	Yes
Median survival
Cdx2 -/-	Undefined
Apc+/- Cdx2 -/- Braf V600E	158
Hazard Ratio (Mantel-Haenszel)
Ratio (and its reciprocal)	0.03502	28.56
95% CI of ratio	0.005029 to 0.2438	4.101 to 198.8
Hazard Ratio (logrank)
Ratio (and its reciprocal)	0.07154	13.98
95% CI of ratio	0.005694 to 0.2154	4.643 to 175.6
