# Supplementary material for: BRAFV600E cooperates with CDX2 inactivation to promote serrated colorectal tumorigenesis
Source: eLife journal article supplement (doi:10.7554/elife.20331), 2017-01-10
Supplement: supp [file elife-20331-supp-v1.zip › elife_poa_e20331_Figure_3_figure_supplement_2.pdf]

A

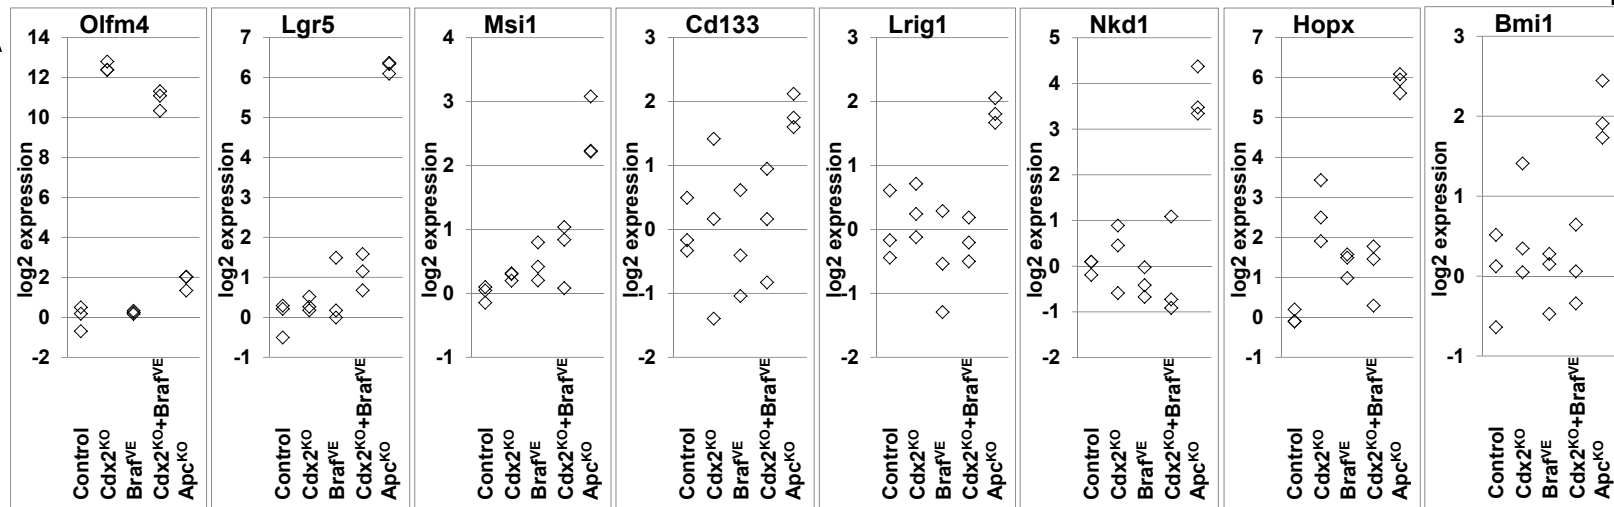

B

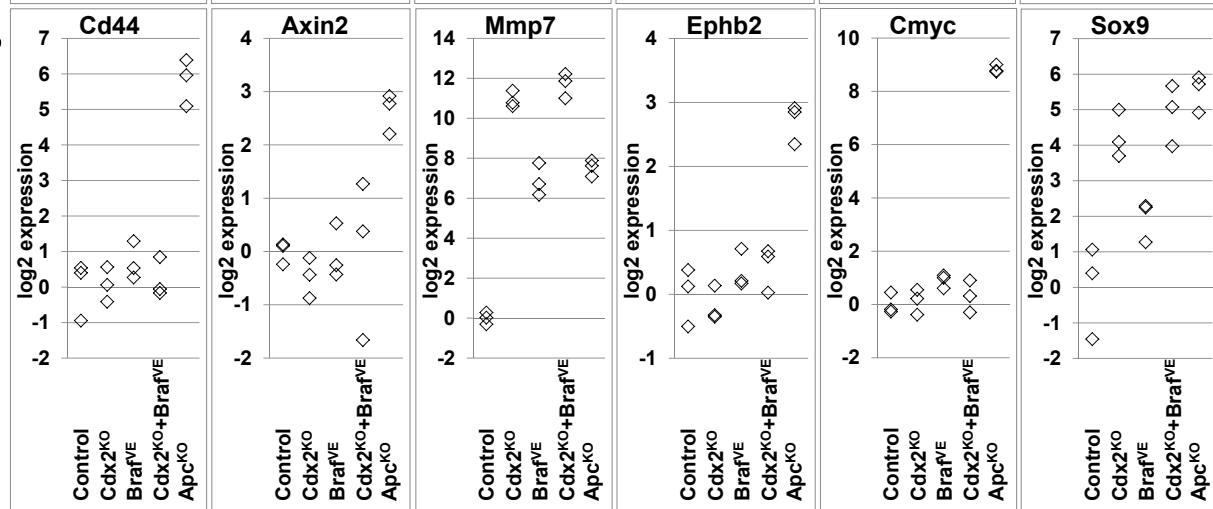

C

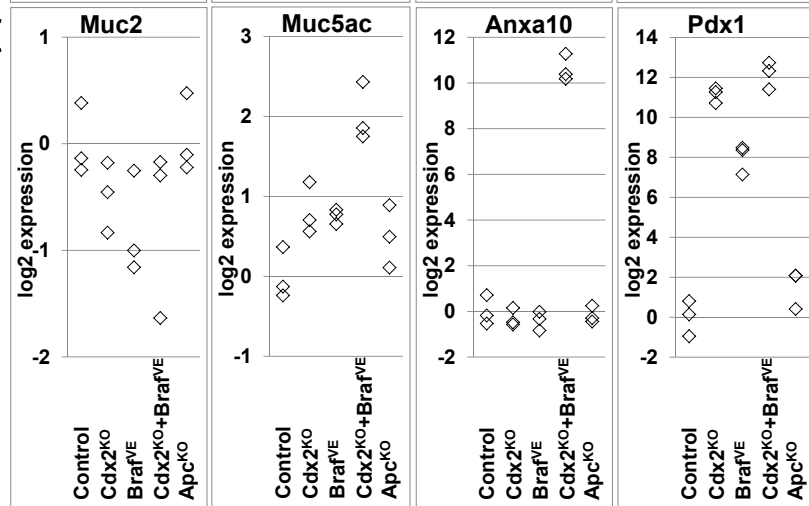

| Genes  | Pairwise contrast p values    |                               |                                                       |                                                                     |                                                                     |                              |                                                                    | Interaction<br>(Cdx2 <sup>KO</sup> +Braf <sup>VE</sup> - Braf <sup>VE</sup> ) -<br>(Cdx2 <sup>KO</sup> - cont) | Ratio of ratios<br>(Cdx2 <sup>KO</sup> +Braf <sup>VE</sup> / Braf <sup>VE</sup> ) /<br>(Cdx2 <sup>KO</sup> / cont) |
|--------|-------------------------------|-------------------------------|-------------------------------------------------------|---------------------------------------------------------------------|---------------------------------------------------------------------|------------------------------|--------------------------------------------------------------------|----------------------------------------------------------------------------------------------------------------|--------------------------------------------------------------------------------------------------------------------|
|        | Cdx2 <sup>KO</sup><br>vs cont | Braf <sup>VE</sup> vs<br>cont | Cdx2 <sup>KO</sup> +<br>Braf <sup>VE</sup> vs<br>cont | Cdx2 <sup>KO</sup> +<br>Braf <sup>VE</sup> vs<br>Cdx2 <sup>KO</sup> | Cdx2 <sup>KO</sup> +<br>Braf <sup>VE</sup> vs<br>Braf <sup>VE</sup> | Apc <sup>KO</sup> vs<br>cont | Cdx2 <sup>KO</sup> +<br>Braf <sup>VE</sup> vs<br>Apc <sup>KO</sup> |                                                                                                                |                                                                                                                    |
| Olfm4  | 5.1E-12                       | 0.477                         | 2E-11                                                 | 0.001                                                               | 2.5E-11                                                             | 3.40E-04                     | 1.2E-10                                                            | 0.003                                                                                                          | 0.275                                                                                                              |
| Lgr5   | 0.427                         | 0.183                         | 0.015                                                 | 0.060                                                               | 0.161                                                               | 1.6E-08                      | 1.1E-07                                                            | 0.637                                                                                                          | 1.202                                                                                                              |
| Msi1   | 0.362                         | 0.128                         | 0.045                                                 | 0.211                                                               | 0.542                                                               | 5E-06                        | 6.7E-05                                                            | 0.824                                                                                                          | 0.938                                                                                                              |
| Cd133  | 0.931                         | 0.703                         | 0.896                                                 | 0.965                                                               | 0.610                                                               | 0.027                        | 0.034                                                              | 0.763                                                                                                          | 1.239                                                                                                              |
| Lrig1  | 0.509                         | 0.238                         | 0.681                                                 | 0.294                                                               | 0.425                                                               | 0.001                        | 0.001                                                              | 0.919                                                                                                          | 1.043                                                                                                              |
| Nkd1   | 0.657                         | 0.513                         | 0.742                                                 | 0.445                                                               | 0.741                                                               | 4.7E-05                      | 3.1E-05                                                            | 0.935                                                                                                          | 0.956                                                                                                              |
| Hopx   | 1.21E-04                      | 0.011                         | 0.021                                                 | 0.008                                                               | 0.695                                                               | 8.7E-08                      | 7.1E-07                                                            | 0.001                                                                                                          | 0.145                                                                                                              |
| Bmi1   | 0.195                         | 0.973                         | 0.786                                                 | 0.293                                                               | 0.760                                                               | 0.001                        | 0.001                                                              | 0.465                                                                                                          | 0.725                                                                                                              |
| Cd44   | 0.894                         | 0.198                         | 0.691                                                 | 0.791                                                               | 0.355                                                               | 4.5E-07                      | 6.4E-07                                                            | 0.452                                                                                                          | 0.677                                                                                                              |
| Axin2  | 0.456                         | 0.933                         | 0.994                                                 | 0.460                                                               | 0.939                                                               | 0.002                        | 0.002                                                              | 0.559                                                                                                          | 1.440                                                                                                              |
| Mmp7   | 2.6E-10                       | 2.3E-08                       | 1.3E-10                                               | 0.110                                                               | 7E-07                                                               | 9.8E-09                      | 2.6E-06                                                            | 1.89E-06                                                                                                       | 0.014                                                                                                              |
| Ephb2  | 0.535                         | 0.224                         | 0.156                                                 | 0.055                                                               | 0.816                                                               | 2.3E-06                      | 1.1E-05                                                            | 0.547                                                                                                          | 1.187                                                                                                              |
| Cmyc   | 0.702                         | 0.022                         | 0.374                                                 | 0.604                                                               | 0.106                                                               | 1.3E-10                      | 1.9E-10                                                            | 0.155                                                                                                          | 0.606                                                                                                              |
| Sox9   | 9.5E-05                       | 0.018                         | 3E-05                                                 | 0.370                                                               | 0.001                                                               | 1.1E-05                      | 0.390                                                              | 0.209                                                                                                          | 0.407                                                                                                              |
| Muc2   | 0.258                         | 0.077                         | 0.117                                                 | 0.616                                                               | 0.805                                                               | 0.907                        | 0.096                                                              | 0.329                                                                                                          | 1.508                                                                                                              |
| Muc5ac | 0.010                         | 0.016                         | 1.5E-05                                               | 0.001                                                               | 0.001                                                               | 0.083                        | 1.63E-04                                                           | 0.255                                                                                                          | 1.358                                                                                                              |
| Anxa10 | 0.475                         | 0.351                         | 1.4E-10                                               | 1E-10                                                               | 9.6E-11                                                             | 0.689                        | 1.2E-10                                                            | 2.24E-09                                                                                                       | 2526.807                                                                                                           |
| Pdx1   | 6.1E-09                       | 1.5E-07                       | 2.6E-09                                               | 0.133                                                               | 5.3E-05                                                             | 0.034                        | 9.6E-09                                                            | 1.23E-05                                                                                                       | 0.008                                                                                                              |
