# Supplementary material for: BRAFV600E cooperates with CDX2 inactivation to promote serrated colorectal tumorigenesis
Source: eLife journal article supplement (doi:10.7554/elife.20331), 2017-01-10
Supplement: supp [file elife-20331-supp-v1.zip › elife_poa_e20331_Figure_3_figure_supplement_2_source_data_1.xlsx]

## Sheet: Sheet1
	These are the negative of the delta-CTs which amounts to the CT for actin minus the CT for the gene of interest (so bigger means more).																					p-values, from ANOVA model with terms for 5 means
	In the second block of rows at the bottom, we normalize to make the average of the normals samples be zero.															means						some pairwise contast p-values (10 possible)										interaction	Fold changes										ratio of ratios
	Normal_1	Normal_2	Normal_3	Cdx2_1	Cdx2_2	Cdx2_3	Braf_1	Braf_2	Braf_3	Cdx2_Braf_1	Cdx2_Braf_2	Cdx2_Braf_3	Apc_1	Apc_2	Apc_3	control	Cdx2	Braf	Cdx2+Braf	Apc	MSE, 5 groups, 10 df	Cdx2 vs cont	Braf vs cont	Cdx2+Braf vs cont	Cdx2+Braf vs Cdx2	Cdx2+Braf vs Braf	Cdx2+Braf vs Apc	Braf vs Cdx2	Apc vs cont	Apc vs Cdx2	Apc vs Braf	(Cdx2+Braf - Braf) - (Cdx2 - cont)	Cdx2 vs cont	Braf vs cont	Cdx2+Braf vs cont	Cdx2+Braf vs Cdx2	Cdx2+Braf vs Braf	Cdx2+Braf vs Apc	Braf vs Cdx2	Apc vs cont	Apc vs Cdx2	Apc vs Braf	(Cdx2+Braf - Braf) - (Cdx2 - cont)
Olfm4	-7.6584	-7.3372	-8.5316	4.5346	4.9518	4.546	-7.5911	-7.6756	-7.5093	3.4668	3.2439	2.4927	-6.4965	-5.8219	-5.8002	-7.8424	4.67747	-7.592	3.0678	-6.03953	0.172528	5.06277e-12	0.477284	1.98367e-11	0.000784646	2.49689e-11	1.18471e-10	6.18772e-12	0.000339714	2.36794e-11	0.00101435	0.00306793	5872.94	1.18954	1924.41	0.327674	1617.78	551.544	0.000202545	3.48913	0.000594103	2.93318	0.275464
Lgr5	-6.0897	-5.291	-5.3748	-5.4095	-5.0689	-5.318	-4.0949	-5.5909	-5.4125	-4.4346	-3.9993	-4.908	0.7544	0.51	0.783	-5.58517	-5.26547	-5.03277	-4.4473	0.682467	0.224093	0.427459	0.18344	0.0146871	0.0603508	0.160791	1.12682e-07	0.560547	1.64981e-08	2.73382e-08	4.01235e-08	0.637302	1.24807	1.46652	2.20055	1.76316	1.50052	0.0285619	1.17503	77.0452	61.7314	52.536	1.20227
Msi1	-7.545	-7.3554	-7.3018	-7.2025	-7.0977	-7.0859	-6.9818	-7.1984	-6.6038	-6.3638	-6.5624	-7.3184	-5.1844	-5.1687	-4.3213	-7.40073	-7.1287	-6.928	-6.7482	-4.89147	0.121718	0.362108	0.127998	0.0449592	0.211237	0.542076	6.7396e-05	0.497167	5.01745e-06	1.38346e-05	3.10766e-05	0.823522	1.20751	1.38774	1.57193	1.30179	1.13273	0.276101	1.14926	5.69331	4.71492	4.10259	0.938069
Cd133	-1.2813	-1.4471	-0.62	0.3022	-2.5103	-0.9518	-0.5007	-1.5212	-2.1577	-0.1671	-0.9526	-1.9441	0.6331	1.0039	0.4862	-1.11613	-1.0533	-1.3932	-1.02127	0.707733	0.74792	0.930852	0.703013	0.895793	0.96471	0.609869	0.0343415	0.640621	0.0272792	0.0317751	0.0139192	0.763272	1.04452	0.825267	1.06797	1.02245	1.29409	0.301661	0.790096	3.54029	3.38941	4.28987	1.23893
Lrig1	-2.7038	-1.9249	-2.9768	-2.2915	-1.8212	-2.6539	-2.2472	-3.8269	-3.0699	-2.3492	-2.7405	-3.0345	-0.7296	-0.482	-0.8662	-2.53517	-2.25553	-3.048	-2.70807	-0.6926	0.250524	0.509368	0.238061	0.681196	0.294081	0.424943	0.000594441	0.0812007	0.00112797	0.00334946	0.000181784	0.918968	1.21389	0.700845	0.887058	0.730759	1.2657	0.247334	0.577356	3.58648	2.95454	5.11736	1.04268
Nkd1	-1.237	-1.2337	-1.5272	-1.9234	-0.8803	-0.4428	-2.0075	-1.7483	-1.3559	-0.2468	-2.2455	-2.0619	2.0062	2.141	3.0386	-1.33263	-1.08217	-1.7039	-1.51807	2.39527	0.450019	0.657245	0.513261	0.741952	0.444615	0.741419	3.12486e-05	0.282807	4.70553e-05	8.36509e-05	2.10141e-05	0.935149	1.18959	0.773103	0.879385	0.739232	1.13747	0.0663696	0.64989	13.2498	11.1381	17.1385	0.956188
Hopx	-3.7434	-3.4418	-3.7377	-0.2041	-1.1409	-1.7315	-2.0661	-2.1483	-2.6558	-1.8647	-2.182	-3.3463	1.9669	2.4423	2.3064	-3.64097	-1.0255	-2.29007	-2.46433	2.23853	0.278704	0.000120743	0.0106182	0.0212042	0.00751595	0.694514	7.11354e-07	0.0149458	8.68379e-08	1.89894e-05	1.00924e-06	0.00101626	6.12821	2.55071	2.26049	0.368865	0.886218	0.0383969	0.416224	58.8716	9.60665	23.0805	0.144613
Bmi1	-4.3452	-3.1901	-3.5831	-2.2976	-3.361	-3.6589	-3.5564	-4.1791	-3.428	-3.0637	-3.6458	-4.047	-1.2605	-1.7991	-1.9737	-3.70613	-3.10583	-3.72117	-3.5855	-1.67777	0.280217	0.19502	0.972938	0.785852	0.293066	0.760058	0.00130659	0.184987	0.000850631	0.00795884	0.000806954	0.464715	1.51603	0.989634	1.08721	0.717143	1.0986	0.266511	0.652779	4.07943	2.69086	4.12216	0.724655
Cd44	-4.2154	-2.8718	-2.7332	-3.2117	-3.6876	-2.7133	-3.0042	-2.7362	-1.9802	-2.4289	-3.3289	-3.4402	2.6878	1.8172	3.1124	-3.27347	-3.2042	-2.57353	-3.066	2.53913	0.386612	0.894183	0.198049	0.691407	0.790993	0.354909	6.37004e-07	0.242488	4.53854e-07	5.07641e-07	1.49023e-06	0.452114	1.04918	1.62443	1.15466	1.10053	0.710809	0.0205441	1.54828	56.204	53.5693	34.5992	0.677488
Axin2	-2.799	-2.7714	-3.1464	-3.0265	-3.7818	-3.3417	-2.3762	-3.3364	-3.1641	-1.6364	-2.5281	-4.5661	-0.1321	0.0099	-0.7005	-2.9056	-3.38333	-2.9589	-2.9102	-0.274233	0.569256	0.455996	0.932761	0.994189	0.460224	0.93855	0.0016142	0.506511	0.00163331	0.000501507	0.00142572	0.559133	0.718105	0.963729	0.996817	1.38812	1.03433	0.160877	1.34205	6.19613	8.62844	6.42932	1.44036
Mmp7	-6.4385	-6.1887	-6.7702	4.1401	4.9137	4.3119	-0.2911	0.2453	1.2945	5.3953	5.7499	4.5364	1.4148	0.6214	1.1541	-6.4658	4.45523	0.416233	5.2272	1.06343	0.290688	2.58853e-10	2.34837e-08	1.31977e-10	0.110038	7.00364e-07	2.64155e-06	3.47898e-06	9.84797e-09	1.63417e-05	0.172262	1.88684e-06	1938.91	117.95	3310.88	1.7076	28.0702	17.9233	0.0608331	184.725	0.0952723	1.56613	0.0144773
Ephb2	-1.541	-0.9159	-0.658	-1.389	-0.9028	-1.3639	-0.3273	-0.8696	-0.8265	-1.0107	-0.4485	-0.3624	1.3086	1.813	1.8713	-1.0383	-1.21857	-0.674467	-0.6072	1.6643	0.118332	0.535427	0.224293	0.155825	0.0545499	0.81556	1.07049e-05	0.0814584	2.25974e-06	1.25114e-06	8.27733e-06	0.547115	0.88254	1.28684	1.34826	1.52771	1.04773	0.207114	1.45811	6.50974	7.37614	5.0587	1.18718
Cmyc	-4.7773	-4.1376	-4.8595	-4.373	-4.9712	-4.0371	-3.5891	-3.9837	-3.5011	-3.6856	-4.273	-4.8887	4.4106	4.1476	4.1827	-4.59147	-4.46043	-3.6913	-4.28243	4.24697	0.165687	0.701665	0.0219911	0.374356	0.603957	0.105661	1.8531e-10	0.0431963	1.3043e-10	1.51148e-10	3.76038e-10	0.155437	1.09508	1.86628	1.23888	1.13131	0.663821	0.00270642	1.70425	457.755	418.012	245.277	0.606186
Sox9	-7.2338	-5.3829	-4.7179	-0.7784	-2.0783	-1.6892	-3.5311	-4.5056	-3.4884	-0.1142	-0.7046	-1.8073	0.1309	-0.8606	-0.0586	-5.7782	-1.5153	-3.8417	-0.875367	-0.262767	0.698266	9.53009e-05	0.0176007	2.97529e-05	0.370381	0.00144888	0.390362	0.00666133	1.07467e-05	0.0962586	0.000375799	0.208727	19.1982	3.82776	29.9158	1.55826	7.81547	0.654017	0.199381	45.7415	2.38259	11.95	0.407094
Muc2	5.9581	6.0659	6.5852	5.7487	5.3684	6.0237	5.9507	5.2018	5.0433	6.032	5.9056	4.5685	5.9806	6.0997	6.6763	6.20307	5.7136	5.3986	5.50203	6.2522	0.250329	0.258482	0.0772421	0.116914	0.615798	0.805249	0.0961765	0.45849	0.906649	0.216758	0.0631809	0.328954	0.712288	0.572574	0.615131	0.863599	1.07433	0.594535	0.803851	1.03464	1.45256	1.807	1.50828
Muc5ac	-17.1677	-16.5625	-17.0587	-16.3667	-16.2235	-15.7499	-16.1549	-16.2749	-16.0969	-15.1788	-14.4985	-15.0746	-16.0392	-16.8198	-16.4336	-16.9296	-16.1134	-16.1756	-14.9173	-16.4309	0.100622	0.0103048	0.0155261	1.51953e-05	0.000953477	0.000663227	0.000162954	0.815062	0.0830176	0.248334	0.347522	0.25531	1.76084	1.68654	4.03434	2.29114	2.39208	2.85515	0.957802	1.41301	0.802459	0.837813	1.35849
Anxa10	-4.0886	-3.1994	-4.441	-4.387	-3.7558	-4.4806	-3.9243	-4.7459	-4.236	7.3651	6.4731	6.2705	-4.3562	-4.2029	-3.6651	-3.90967	-4.2078	-4.30207	6.7029	-4.07473	0.241544	0.474606	0.351207	1.37773e-10	1.04799e-10	9.62605e-11	1.18301e-10	0.819017	0.689496	0.747035	0.583535	2.23481e-09	0.813304	0.761861	1565.67	1925.08	2055.06	1755.46	0.936748	0.891887	1.09662	1.17067	2526.81
Pdx1	-15.7802	-15.1173	-16.8762	-4.66	-4.4749	-5.2131	-7.56	-8.7846	-7.4429	-3.1882	-3.5988	-4.5231	-13.8444	-15.5146	-13.8503	-15.9246	-4.78267	-7.92917	-3.77003	-14.4031	0.57658	6.09032e-09	1.48003e-07	2.60869e-09	0.133453	5.30891e-05	9.58948e-09	0.000481231	0.0340228	2.52335e-08	1.06783e-06	1.22499e-05	2259.68	255.185	4559.1	2.01759	17.8659	1588.08	0.11293	2.87083	0.00127046	0.01125	0.00790638
	normalizd to make normals average to zero
Olfm4	0.184	0.5052	-0.6892	12.377	12.7942	12.3884	0.2513	0.1668	0.3331	11.3092	11.0863	10.3351	1.3459	2.0205	2.0422	2.96059e-16	12.5199	0.2504	10.9102	1.80287	0.172528	5.06277e-12	0.477284	1.98367e-11	0.000784646	2.49689e-11	1.18471e-10	6.18772e-12	0.000339714	2.36794e-11	0.00101435	0.00306793	5872.94	1.18954	1924.41	0.327674	1617.78	551.544	0.000202545	3.48913	0.000594103	2.93318	0.275464
Lgr5	-0.504533	0.294167	0.210367	0.175667	0.516267	0.267167	1.49027	-0.00573333	0.172667	1.15057	1.58587	0.677167	6.33957	6.09517	6.36817	0	0.3197	0.5524	1.13787	6.26763	0.224093	0.427459	0.18344	0.0146871	0.0603508	0.160791	1.12682e-07	0.560547	1.64981e-08	2.73382e-08	4.01235e-08	0.637302	1.24807	1.46652	2.20055	1.76316	1.50052	0.0285619	1.17503	77.0452	61.7314	52.536	1.20227
Msi1	-0.144267	0.0453333	0.0989333	0.198233	0.303033	0.314833	0.418933	0.202333	0.796933	1.03693	0.838333	0.0823333	2.21633	2.23203	3.07943	2.96059e-16	0.272033	0.472733	0.652533	2.50927	0.121718	0.362108	0.127998	0.0449592	0.211237	0.542076	6.7396e-05	0.497167	5.01745e-06	1.38346e-05	3.10766e-05	0.823522	1.20751	1.38774	1.57193	1.30179	1.13273	0.276101	1.14926	5.69331	4.71492	4.10259	0.938069
Cd133	-0.165167	-0.330967	0.496133	1.41833	-1.39417	0.164333	0.615433	-0.405067	-1.04157	0.949033	0.163533	-0.827967	1.74923	2.12003	1.60233	0	0.0628333	-0.277067	0.0948667	1.82387	0.74792	0.930852	0.703013	0.895793	0.96471	0.609869	0.0343415	0.640621	0.0272792	0.0317751	0.0139192	0.763272	1.04452	0.825267	1.06797	1.02245	1.29409	0.301661	0.790096	3.54029	3.38941	4.28987	1.23893
Lrig1	-0.168633	0.610267	-0.441633	0.243667	0.713967	-0.118733	0.287967	-1.29173	-0.534733	0.185967	-0.205333	-0.499333	1.80557	2.05317	1.66897	1.4803e-16	0.279633	-0.512833	-0.1729	1.84257	0.250524	0.509368	0.238061	0.681196	0.294081	0.424943	0.000594441	0.0812007	0.00112797	0.00334946	0.000181784	0.918968	1.21389	0.700845	0.887058	0.730759	1.2657	0.247334	0.577356	3.58648	2.95454	5.11736	1.04268
Nkd1	0.0956333	0.0989333	-0.194567	-0.590767	0.452333	0.889833	-0.674867	-0.415667	-0.0232667	1.08583	-0.912867	-0.729267	3.33883	3.47363	4.37123	0	0.250467	-0.371267	-0.185433	3.7279	0.450019	0.657245	0.513261	0.741952	0.444615	0.741419	3.12486e-05	0.282807	4.70553e-05	8.36509e-05	2.10141e-05	0.935149	1.18959	0.773103	0.879385	0.739232	1.13747	0.0663696	0.64989	13.2498	11.1381	17.1385	0.956188
Hopx	-0.102433	0.199167	-0.0967333	3.43687	2.50007	1.90947	1.57487	1.49267	0.985167	1.77627	1.45897	0.294667	5.60787	6.08327	5.94737	-1.4803e-16	2.61547	1.3509	1.17663	5.8795	0.278704	0.000120743	0.0106182	0.0212042	0.00751595	0.694514	7.11354e-07	0.0149458	8.68379e-08	1.89894e-05	1.00924e-06	0.00101626	6.12821	2.55071	2.26049	0.368865	0.886218	0.0383969	0.416224	58.8716	9.60665	23.0805	0.144613
Bmi1	-0.639067	0.516033	0.123033	1.40853	0.345133	0.0472333	0.149733	-0.472967	0.278133	0.642433	0.0603333	-0.340867	2.44563	1.90703	1.73243	0	0.6003	-0.0150333	0.120633	2.02837	0.280217	0.19502	0.972938	0.785852	0.293066	0.760058	0.00130659	0.184987	0.000850631	0.00795884	0.000806954	0.464715	1.51603	0.989634	1.08721	0.717143	1.0986	0.266511	0.652779	4.07943	2.69086	4.12216	0.724655
Cd44	-0.941933	0.401667	0.540267	0.0617667	-0.414133	0.560167	0.269267	0.537267	1.29327	0.844567	-0.0554333	-0.166733	5.96127	5.09067	6.38587	0	0.0692667	0.699933	0.207467	5.8126	0.386612	0.894183	0.198049	0.691407	0.790993	0.354909	6.37004e-07	0.242488	4.53854e-07	5.07641e-07	1.49023e-06	0.452114	1.04918	1.62443	1.15466	1.10053	0.710809	0.0205441	1.54828	56.204	53.5693	34.5992	0.677488
Axin2	0.1066	0.1342	-0.2408	-0.1209	-0.8762	-0.4361	0.5294	-0.4308	-0.2585	1.2692	0.3775	-1.6605	2.7735	2.9155	2.2051	0	-0.477733	-0.0533	-0.0046	2.63137	0.569256	0.455996	0.932761	0.994189	0.460224	0.93855	0.0016142	0.506511	0.00163331	0.000501507	0.00142572	0.559133	0.718105	0.963729	0.996817	1.38812	1.03433	0.160877	1.34205	6.19613	8.62844	6.42932	1.44036
Mmp7	0.0273	0.2771	-0.3044	10.6059	11.3795	10.7777	6.1747	6.7111	7.7603	11.8611	12.2157	11.0022	7.8806	7.0872	7.6199	-2.96059e-16	10.921	6.88203	11.693	7.52923	0.290688	2.58853e-10	2.34837e-08	1.31977e-10	0.110038	7.00364e-07	2.64155e-06	3.47898e-06	9.84797e-09	1.63417e-05	0.172262	1.88684e-06	1938.91	117.95	3310.88	1.7076	28.0702	17.9233	0.0608331	184.725	0.0952723	1.56613	0.0144773
Ephb2	-0.5027	0.1224	0.3803	-0.3507	0.1355	-0.3256	0.711	0.1687	0.2118	0.0276	0.5898	0.6759	2.3469	2.8513	2.9096	0	-0.180267	0.363833	0.4311	2.7026	0.118332	0.535427	0.224293	0.155825	0.0545499	0.81556	1.07049e-05	0.0814584	2.25974e-06	1.25114e-06	8.27733e-06	0.547115	0.88254	1.28684	1.34826	1.52771	1.04773	0.207114	1.45811	6.50974	7.37614	5.0587	1.18718
Cmyc	-0.185833	0.453867	-0.268033	0.218467	-0.379733	0.554367	1.00237	0.607767	1.09037	0.905867	0.318467	-0.297233	9.00207	8.73907	8.77417	-2.96059e-16	0.131033	0.900167	0.309033	8.83843	0.165687	0.701665	0.0219911	0.374356	0.603957	0.105661	1.8531e-10	0.0431963	1.3043e-10	1.51148e-10	3.76038e-10	0.155437	1.09508	1.86628	1.23888	1.13131	0.663821	0.00270642	1.70425	457.755	418.012	245.277	0.606186
Sox9	-1.4556	0.3953	1.0603	4.9998	3.6999	4.089	2.2471	1.2726	2.2898	5.664	5.0736	3.9709	5.9091	4.9176	5.7196	0	4.2629	1.9365	4.90283	5.51543	0.698266	9.53009e-05	0.0176007	2.97529e-05	0.370381	0.00144888	0.390362	0.00666133	1.07467e-05	0.0962586	0.000375799	0.208727	19.1982	3.82776	29.9158	1.55826	7.81547	0.654017	0.199381	45.7415	2.38259	11.95	0.407094
Muc2	-0.244967	-0.137167	0.382133	-0.454367	-0.834667	-0.179367	-0.252367	-1.00127	-1.15977	-0.171067	-0.297467	-1.63457	-0.222467	-0.103367	0.473233	-2.96059e-16	-0.489467	-0.804467	-0.701033	0.0491333	0.250329	0.258482	0.0772421	0.116914	0.615798	0.805249	0.0961765	0.45849	0.906649	0.216758	0.0631809	0.328954	0.712288	0.572574	0.615131	0.863599	1.07433	0.594535	0.803851	1.03464	1.45256	1.807	1.50828
Muc5ac	-0.238067	0.367133	-0.129067	0.562933	0.706133	1.17973	0.774733	0.654733	0.832733	1.75083	2.43113	1.85503	0.890433	0.109833	0.496033	-2.36848e-15	0.816267	0.754067	2.01233	0.498767	0.100622	0.0103048	0.0155261	1.51953e-05	0.000953477	0.000663227	0.000162954	0.815062	0.0830176	0.248334	0.347522	0.25531	1.76084	1.68654	4.03434	2.29114	2.39208	2.85515	0.957802	1.41301	0.802459	0.837813	1.35849
Anxa10	-0.178933	0.710267	-0.531333	-0.477333	0.153867	-0.570933	-0.0146333	-0.836233	-0.326333	11.2748	10.3828	10.1802	-0.446533	-0.293233	0.244567	0	-0.298133	-0.3924	10.6126	-0.165067	0.241544	0.474606	0.351207	1.37773e-10	1.04799e-10	9.62605e-11	1.18301e-10	0.819017	0.689496	0.747035	0.583535	2.23481e-09	0.813304	0.761861	1565.67	1925.08	2055.06	1755.46	0.936748	0.891887	1.09662	1.17067	2526.81
Pdx1	0.144367	0.807267	-0.951633	11.2646	11.4497	10.7115	8.36457	7.13997	8.48167	12.7364	12.3258	11.4015	2.08017	0.409967	2.07427	-1.18424e-15	11.1419	7.9954	12.1545	1.52147	0.57658	6.09032e-09	1.48003e-07	2.60869e-09	0.133453	5.30891e-05	9.58948e-09	0.000481231	0.0340228	2.52335e-08	1.06783e-06	1.22499e-05	2259.68	255.185	4559.1	2.01759	17.8659	1588.08	0.11293	2.87083	0.00127046	0.01125	0.00790638

## Sheet: graphs
	1	1	1	2	2	2	3	3	3	4	4	4	5	5	5							p-values
	You can copy a row from the first sheet to rows 4 or 5 to make graphs.															means						some pairwise contast p-values (10 possible)										interaction	Fold changes										ratio of ratios
	Normal_1	Normal_2	Normal_3	Cdx2_1	Cdx2_2	Cdx2_3	Braf_1	Braf_2	Braf_3	Cdx2_Braf_1	Cdx2_Braf_2	Cdx2_Braf_3	Apc_1	Apc_2	Apc_3	control	Cdx2	Braf	Cdx2+Braf	Apc	MSE, 5 groups, 10 df	Cdx2 vs cont	Braf vs cont	Cdx2+Braf vs cont	Cdx2+Braf vs Cdx2	Cdx2+Braf vs Braf	Cdx2+Braf vs Apc	Braf vs Cdx2	Apc vs cont	Apc vs Cdx2	Apc vs Braf	(Cdx2+Braf - Braf) - (Cdx2 - cont)	Cdx2 vs cont	Braf vs cont	Cdx2+Braf vs cont	Cdx2+Braf vs Cdx2	Cdx2+Braf vs Braf	Cdx2+Braf vs Apc	Braf vs Cdx2	Apc vs cont	Apc vs Cdx2	Apc vs Braf	(Cdx2+Braf - Braf) - (Cdx2 - cont)
Anxa10	-0.178933	0.710267	-0.531333	-0.477333	0.153867	-0.570933	-0.0146333	-0.836233	-0.326333	11.2748	10.3828	10.1802	-0.446533	-0.293233	0.244567	0	-0.298133	-0.3924	10.6126	-0.165067	0.241544	0.474606	0.351207	1.37773e-10	1.04799e-10	9.62605e-11	1.18301e-10	0.819017	0.689496	0.747035	0.583535	2.23481e-09	0.813304	0.761861	1565.67	1925.08	2055.06	1755.46	0.936748	0.891887	1.09662	1.17067	2526.81
Pdx1	0.144367	0.807267	-0.951633	11.2646	11.4497	10.7115	8.36457	7.13997	8.48167	12.7364	12.3258	11.4015	2.08017	0.409967	2.07427	-1.18424e-15	11.1419	7.9954	12.1545	1.52147	0.57658	6.09032e-09	1.48003e-07	2.60869e-09	0.133453	5.30891e-05	9.58948e-09	0.000481231	0.0340228	2.52335e-08	1.06783e-06	1.22499e-05	2259.68	255.185	4559.1	2.01759	17.8659	1588.08	0.11293	2.87083	0.00127046	0.01125	0.00790638
															stdevs	0.639848	0.394231	0.414765	0.58236	0.362939
																0.888293	0.384084	0.743137	0.683725	0.962592
Anxa10, antilog	0.883356	1.63611	0.691915	0.718304	1.11255	0.673181	0.989908	0.560104	0.797561	2477.67	1335.13	1160.21	0.733804	0.816071	1.18474																				Here's a different style of graph, still log scale.
Pdx1, antilog	1.10525	1.74989	0.517047	2460.21	2797	1676.77	329.599	141.041	357.467	6823.83	5133.64	2705.1	4.22856	1.32866	4.2113
			Anxa10, log2 expression
			Pdx1, log2 expression
			Copies below for customizing (usually, altered range of axes)
