# Supplementary material for: BRAFV600E cooperates with CDX2 inactivation to promote serrated colorectal tumorigenesis
Source: eLife journal article supplement (doi:10.7554/elife.20331), 2017-01-10
Supplement: supp [file elife-20331-supp-v1.zip › elife_poa_e20331_Figure_5_source_data_1.xlsx]

## Sheet: Q15
Principal components, computed in Matlab, 15 samples, 25216 "main" probe-sets that were log2-transformed
rep?	sex	trt	cel file	PC#1	PC#2	PC#3	PC#4	PC#5	PC#6	PC#7	PC#8	PC#9	PC#10	PC#11	PC#12	PC#13	PC#14	PC#15
	male	control	Fearon_004_ERF.33.ga.cel	46.0343	0.777578	11.2103	16.5162	-22.4341	23.2491	4.21167	-6.3053	26.7986	7.39849	-0.714484	0.199923	-0.30176	1.01458	7.29868e-14
	female	control	Fearon_005_ERF.34.ga.cel	31.6347	-6.12019	-4.6541	15.6268	-19.69	-44.8417	-0.252411	2.96505	6.00716	-2.82287	4.90834	3.2352	-0.437754	0.435114	9.11033e-15
	female	control	Fearon_006_ERF.35.ga.cel	45.4737	5.7193	25.4496	40.7127	7.66387	8.8544	-2.16307	7.24643	-24.1663	-0.314972	-2.20747	-0.756143	0.0524302	-0.606383	1.02161e-13
	male	Cdx2 KO	Fearon_001_ERF.30.ga.cel	27.7365	12.4894	12.4823	-29.4726	-17.5651	11.4108	8.85993	3.92037	-7.12352	-21.9571	10.5479	5.49272	-0.632919	-0.961446	1.02378e-13
	male	Cdx2 KO	Fearon_002_ERF.31.ga.cel	13.8648	16.4566	15.729	-34.3558	-18.9849	-4.58276	-8.52235	8.12076	-10.155	18.9446	-12.1508	-1.7408	0.077128	0.391332	8.29198e-14
	female	Cdx2 KO	Fearon_003_ERF.32.ga.cel	25.7317	17.6175	37.9777	-15.3622	42.6837	-11.0597	0.917045	-7.32846	12.1294	-0.477308	1.76638	-3.27261	-0.22379	0.577488	6.61068e-14
	male	Braf	Fearon_005_48.ga.cel	28.3398	-1.53669	-34.8166	-4.62442	7.66193	2.78844	-3.60645	-22.4938	-9.38724	3.16229	0.176256	6.55538	-12.6685	10.5049	1.0638e-13
	male	Braf	Fearon_006_49.ga.cel	28.1147	-4.63	-40.6416	-3.70967	19.7883	7.17646	-8.55197	29.8203	8.80318	-0.510829	0.386431	0.819353	-0.979356	-0.21979	5.64852e-14
	male	Braf	Fearon_007_50.ga.cel	26.351	-6.15134	-30.6574	-4.60789	3.08791	0.453399	6.581	-15.1239	-5.89073	1.12514	-0.341188	-9.20442	17.2642	-11.2639	1.07677e-13
	female	Cdx2+Braf	Fearon_001_45.ga.cel	-53.6483	43.2825	-5.82755	8.16637	5.41431	-1.19856	19.1619	0.942791	2.26594	-1.52828	-13.5765	17.5135	5.66668	0.257083	-1.14823e-13
	male	Cdx2+Braf	Fearon_002_46.ga.cel	-53.501	41.3422	-0.153326	7.58765	-5.7489	2.99064	-37.1381	-6.93614	3.63571	-7.87181	1.29894	-1.96727	0.471563	-4.18142	7.9106e-14
	female	Cdx2+Braf	Fearon_003_47.ga.cel	-54.7694	40.313	-7.35244	5.54753	-3.49803	0.145185	19.335	4.89408	-2.40888	7.0131	12.7938	-16.3542	-6.68857	3.00575	5.91489e-14
	female	Apc KO	Fearon_001_ERF39.ga.cel	-34.8449	-54.4706	5.85758	-0.718386	2.06653	0.844669	4.74186	-1.52319	0.152016	1.36845	-2.67531	2.82333	-14.0166	-17.8351	1.77086e-13
	female	Apc KO	Fearon_002_ERF40.ga.cel	-46.2366	-54.3519	11.5105	-1.45157	2.87042	4.27534	-5.48765	1.20362	-2.80242	10.1181	16.0582	9.50791	10.6713	7.28411	1.15418e-13
	female	Apc KO	Fearon_003_ERF41.ga.cel	-30.2809	-50.7374	3.88619	0.145335	-3.31586	-0.505697	1.91367	0.597505	2.14199	-13.6469	-16.2705	-12.8519	1.74595	11.5977	1.74697e-13
fraction of variance (transpose of the S15 vector).				0.316747	0.217813	0.090272	0.0667801	0.052493	0.040067	0.0332166	0.0327326	0.0252095	0.0239862	0.0221191	0.0166834	0.0151701	0.0149426	0.0125678
cumulative fraction				0.316747	0.53456	0.624832	0.691612	0.744105	0.784172	0.817389	0.850122	0.875331	0.899317	0.921436
	min			-54.7694	-54.4706	-40.6416	-34.3558	-22.4341	-44.8417	-37.1381	-22.4938	-24.1663	-21.9571	-16.2705	-16.3542	-14.0166	-17.8351	-1.14823e-13
	max			46.0343	43.2825	37.9777	40.7127	42.6837	23.2491	19.335	29.8203	26.7986	18.9446	16.0582	17.5135	17.2642	11.5977	1.77086e-13

## Sheet: code
Below is Matlab code to compute the principal components, where Z.txt was the matrix of log2-transformed values (15 columns, 25216 rows)
		comments:
>> load Z.txt -Ascii		reads data
>> X = Z - mean(Z')' * ones(1,size(Z,2));		mean centers each gene
>> [U,S,V] = svd(X,0);		get the singular value decomposition
>> Q = X' * U;		transform X by U to get it into the coordinate system of the principal components
>> S = diag(S).^2;		Fiddle with S with two commands to get it to be percent of the total variance for each component
>> S = S / sum(S);
>> save Q15.txt Q -ASCII		Save Q and S into files, later to read into excel sheet to make graphs.
>> save S15.txt S -ASCII
