# Supplementary material for: BRAFV600E cooperates with CDX2 inactivation to promote serrated colorectal tumorigenesis
Source: eLife journal article supplement (doi:10.7554/elife.20331), 2017-01-10
Supplement: supp [file elife-20331-supp-v1.zip › elife_poa_e20331_Figure_5_source_data_3.xlsx]

## Sheet: Sheet1
TCGA Data								25216 Main probe-sets, others on sheets "extra" and "redundant"								batch	1	1	1	1	1	1	3	3	3	3	3	3	2	2	2	3	3	3	2	2	2	1	1	1
18 BRAF-V600E with below median CDX2				Finnish data, GSE 4045																												r of 34	r of 31 - I doubt it.	r of 40															p<.01
(mRNA) vs 106 BRAF-WT with high CDX2				8 serrateds vs 29 conventional							74						male	female	female	male	male	female	male	male	male	female	male	female	female	female	female	female	male - I doubt it.	female	female	female	female	male	male	female									p<.001
(out of 216 tumors with mutation data and mRNA-seq)				Data for "best" probe-set for that gene							21	0.111111		1-to-1 best homolog			control	control	control	Cdx2 KO	Cdx2 KO	Cdx2 KO	Braf	Braf	Braf	Cdx2+Braf	Cdx2+Braf	Cdx2+Braf	Apc KO	Apc KO	Apc KO	control	Cdx2 KO	Apc KO	Apc+Cdx2 KO	Apc+Cdx2 KO	Apc+Cdx2 KO	normal gastric	normal gastric	normal gastric		means
T-test p-value	Fold-change: V600E_lowCDX2 / WT_highCDX2	Selection: p<.01, fold-change>1.3	log2 of FC for selection column	T-test p-value	Fold-change: Serrated / conventional	Selection: p<.01, fold-change>1.3		ProbeID	Affy_Gene_assignment	Affy_mrna_assignemnt	Symbol	Name	EntrezGene	Human gene	UniGene	RefSeq	Fearon_004_ERF.33.ga.cel	Fearon_005_ERF.34.ga.cel	Fearon_006_ERF.35.ga.cel	Fearon_001_ERF.30.ga.cel	Fearon_002_ERF.31.ga.cel	Fearon_003_ERF.32.ga.cel	Fearon_005_48.ga.cel	Fearon_006_49.ga.cel	Fearon_007_50.ga.cel	Fearon_001_45.ga.cel	Fearon_002_46.ga.cel	Fearon_003_47.ga.cel	Fearon_001_ERF39.ga.cel	Fearon_002_ERF40.ga.cel	Fearon_003_ERF41.ga.cel	Fearon_010_52.ga.cel	Fearon_009_51.ga.cel	Fearon_011_53.ga.cel	Fearon_005_ERF42.ga.cel	Fearon_006_ERF43.ga.cel	Fearon_007_ERF44.ga.cel	Fearon_007_ERF.36.ga.cel	Fearon_008_ERF.37.ga.cel	Fearon_009_ERF.38.ga.cel	Cheap malenss score	cont	Cdx2	Braf	Cdx2+Braf	Apc	Apc+Cdx2	gastric	MSE 5 groups, 10 df
3.56101e-17	15.5064	15.5064	3.95479	0.000656552	8.25869	8.25869	3.04591	17509565	NM_001136089 // Anxa10 // annexin A10 // 8 B3.1|8 31.55 cM // 26359 /// NM_011922 // Anxa10 // annexin A10 // 8 B3.1|8 31.55 cM // 26359 /// ENSMUST00000034052 // Anxa10 // annexin A10 // 8 B3.1|8 31.55 cM // 26359 /// ENSMUST00000034054 // Anxa10 // annexin A10 // 8 B3.1|8 31.55 cM // 26359 /// BC125319 // Anxa10 // annexin A10 // 8 B3.1|8 31.55 cM // 26359 /// BC132207 // Anxa10 // annexin A10 …	NM_001136089 // RefSeq // Mus musculus annexin A10 (Anxa10), transcript variant 1, mRNA. // chr8 // 100 // 100 // 25 // 25 // 1 /// NM_011922 // RefSeq // Mus musculus annexin A10 (Anxa10), transcript variant 2, mRNA. // chr8 // 92 // 92 // 23 // 25 // 1 /// ENSMUST00000034052 // ENSEMBL // ensembl:known chromosome:GRCm38:8:62057042:62123112:-1 gene:ENSMUSG00000031635 gene_biotype:protein_coding …	Anxa10	annexin A10	26359	11199	Mm.42179	NM_001136089//NM_011922//NP_001129561//NP_036052	2.74666	2.78091	2.58587	2.87657	3.07923	2.73206	2.31117	2.07934	2.24461	9.3403	10.018	9.13162	2.03918	2.33015	2.28045	2.57262	2.269	2.1081	2.22548	2.22548	2.30111	10.9619	10.8544	10.4314	0.363706	2.70448	2.89595	2.21171	9.49663	2.21659	2.25069	10.7493	0.0588932
0.123513	0.702055	1	0	0.736745	1.05389	1	0	17458514	NM_023456 // Npy // neuropeptide Y // 6 B3|6 24.04 cM // 109648 /// ENSMUST00000031843 // Npy // neuropeptide Y // 6 B3|6 24.04 cM // 109648 /// AF273768 // Npy // neuropeptide Y // 6 B3|6 24.04 cM // 109648 /// BC043012 // Npy // neuropeptide Y // 6 B3|6 24.04 cM // 109648	NM_023456 // RefSeq // Mus musculus neuropeptide Y (Npy), mRNA. // chr6 // 100 // 100 // 22 // 22 // 1 /// ENSMUST00000031843 // ENSEMBL // ensembl_havana_transcript:known chromosome:GRCm38:6:49822710:49829507:1 gene:ENSMUSG00000029819 gene_biotype:protein_coding transcript_biotype:protein_coding // chr6 // 100 // 100 // 22 // 22 // 1 /// AF273768 // GenBank // Mus musculus preproneuropeptide Y (…	Npy	neuropeptide Y	109648	4852	Mm.154796	NM_023456//NP_075945	3.03751	3.1959	3.04819	2.81723	2.94601	3.07937	3.05836	2.85721	2.85462	9.9633	9.3087	10.0685	3.42814	3.82254	3.96884	3.52187	3.2021	3.49137	3.34837	3.53358	3.23935	4.17668	4.59305	3.87654	-0.329823	3.09387	2.94754	2.9234	9.78015	3.73984	3.37377	4.21542	0.057274
			#NUM!				#NUM!	17408897	NM_009892 // Chil3 // chitinase-like 3 // 3 F2.2|3 46.49 cM // 12655 /// ENSMUST00000063062 // Chil3 // chitinase-like 3 // 3 F2.2|3 46.49 cM // 12655 /// BC061154 // Chil3 // chitinase-like 3 // 3 F2.2|3 46.49 cM // 12655 /// D87757 // Chil3 // chitinase-like 3 // 3 F2.2|3 46.49 cM // 12655 /// M94584 // Chil3 // chitinase-like 3 // 3 F2.2|3 46.49 cM // 12655	NM_009892 // RefSeq // Mus musculus chitinase-like 3 (Chil3), mRNA. // chr3 // 100 // 100 // 9 // 9 // 1 /// ENSMUST00000063062 // ENSEMBL // ensembl_havana_transcript:known chromosome:GRCm38:3:106147554:106167564:-1 gene:ENSMUSG00000040809 gene_biotype:protein_coding transcript_biotype:protein_coding // chr3 // 100 // 100 // 9 // 9 // 1 /// BC061154 // GenBank // Mus musculus chitinase 3-like 3,…	Chil3	chitinase-like 3	12655	#N/A	Mm.387173	NM_009892//NP_034022//XM_006500964//XP_006501027	2.82716	2.67452	2.68635	2.33963	2.3118	1.69698	2.6493	3.5328	1.98127	9.32451	7.93	9.62909	8.85266	6.86026	8.06164	3.24348	5.10144	9.00206	8.50763	8.67899	5.15515	2.55798	2.63625	3.84732	-0.257113	2.72934	2.11614	2.72112	8.9612	7.92485	7.44726	3.01385	0.514406
0.00989319	1.22241	1	0				#NUM!	17460538	NM_025467 // Gkn2 // gastrokine 2 // 6|6 D2 // 66284 /// ENSMUST00000032128 // Gkn2 // gastrokine 2 // 6|6 D2 // 66284 /// AY943909 // Gkn2 // gastrokine 2 // 6|6 D2 // 66284 /// BC099445 // Gkn2 // gastrokine 2 // 6|6 D2 // 66284	NM_025467 // RefSeq // Mus musculus gastrokine 2 (Gkn2), mRNA. // chr6 // 100 // 100 // 24 // 24 // 1 /// ENSMUST00000032128 // ENSEMBL // ensembl:known chromosome:GRCm38:6:87373365:87379494:1 gene:ENSMUSG00000030049 gene_biotype:protein_coding transcript_biotype:protein_coding // chr6 // 100 // 100 // 24 // 24 // 1 /// AY943909 // GenBank // Mus musculus blottin precursor, mRNA, complete cds. //…	Gkn2	gastrokine 2	66284	200504	Mm.46446	NM_025467//NP_079743	6.71525	6.35822	3.29515	7.01396	9.26409	6.22023	2.98277	2.80345	2.75412	11.5102	11.7911	11.4171	2.92682	3.03995	3.39986	3.79626	6.70017	3.07332	9.47001	10.1321	10.2616	12.2149	12.2562	12.0734	1.37828	5.45621	7.49943	2.84678	11.5728	3.12221	9.95457	12.1815	1.22819
			#NUM!				#NUM!	17407418	NM_008412 // Ivl // involucrin // 3 F1|3 40.14 cM // 16447 /// XM_006501046 // Ivl // involucrin // 3 F1|3 40.14 cM // 16447 /// ENSMUST00000053107 // Ivl // involucrin // 3 F1|3 40.14 cM // 16447 /// BC152326 // Ivl // involucrin // 3 F1|3 40.14 cM // 16447	NM_008412 // RefSeq // Mus musculus involucrin (Ivl), mRNA. // chr3 // 100 // 100 // 23 // 23 // 1 /// XM_006501046 // RefSeq // PREDICTED: Mus musculus involucrin (Ivl), transcript variant X1, mRNA. // chr3 // 100 // 100 // 23 // 23 // 1 /// ENSMUST00000053107 // ENSEMBL // ensembl:known chromosome:GRCm38:3:92570912:92573715:-1 gene:ENSMUSG00000049128 gene_biotype:protein_coding transcript_bioty…	Ivl	involucrin	16447	#N/A	Mm.207365	NM_008412//NP_032438//XM_006501046//XM_006501047//XP_006501109//XP_006501110	3.55501	2.94865	3.48246	3.10523	2.62176	2.90998	3.13544	3.25519	2.96652	9.27853	9.79484	8.66928	3.02662	3.14815	3.0156	2.83712	3.01456	3.11122	4.02441	3.74044	3.28705	4.60674	4.76486	5.4816	0.3713	3.32871	2.87899	3.11905	9.24755	3.06345	3.68396	4.95107	0.102537
0.55676	1.28065	1	0	0.158372	2.60433	1	0	17342340	NM_018857 // Msln // mesothelin // 17 A3.3|17 // 56047 /// XM_006524649 // Msln // mesothelin // 17 A3.3|17 // 56047 /// ENSMUST00000075884 // Msln // mesothelin // 17 A3.3|17 // 56047 /// BC023753 // Msln // mesothelin // 17 A3.3|17 // 56047 /// D86370 // Msln // mesothelin // 17 A3.3|17 // 56047	NM_018857 // RefSeq // Mus musculus mesothelin (Msln), mRNA. // chr17 // 100 // 100 // 28 // 28 // 0 /// XM_006524649 // RefSeq // PREDICTED: Mus musculus mesothelin (Msln), transcript variant X1, mRNA. // chr17 // 100 // 93 // 26 // 26 // 0 /// ENSMUST00000075884 // ENSEMBL // ensembl:known chromosome:GRCm38:17:25748614:25754327:-1 gene:ENSMUSG00000063011 gene_biotype:protein_coding transcript_b…	Msln	mesothelin	56047	10232	Mm.17510	NM_018857//NP_061345//XM_006524649//XM_006524650//XP_006524712//XP_006524713	3.29112	2.95318	3.30361	2.57654	2.75377	3.14943	2.92505	2.91675	2.78646	8.95035	8.80891	9.13811	3.49699	2.95592	2.92839	2.97041	3.27847	3.42746	5.37632	5.57356	4.49165	4.17809	3.18313	3.77335	-0.185625	3.18264	2.82658	2.87609	8.96579	3.1271	5.14718	3.71152	0.0523347
0.124354	1.049	1	0	0.617524	1.15937	1	0	17468594	NM_025466 // Gkn1 // gastrokine 1 // 6|6 D2 // 66283 /// ENSMUST00000032129 // Gkn1 // gastrokine 1 // 6|6 D2 // 66283 /// AY456960 // Gkn1 // gastrokine 1 // 6|6 D2 // 66283 /// BC099446 // Gkn1 // gastrokine 1 // 6|6 D2 // 66283 /// BC132540 // Gkn1 // gastrokine 1 // 6|6 D2 // 66283 /// BC132542 // Gkn1 // gastrokine 1 // 6|6 D2 // 66283	NM_025466 // RefSeq // Mus musculus gastrokine 1 (Gkn1), mRNA. // chr6 // 100 // 100 // 27 // 27 // 1 /// ENSMUST00000032129 // ENSEMBL // ensembl:known chromosome:GRCm38:6:87345653:87350915:-1 gene:ENSMUSG00000030050 gene_biotype:protein_coding transcript_biotype:protein_coding // chr6 // 100 // 100 // 27 // 27 // 1 /// AY456960 // GenBank // Mus musculus foveolin precursor (Fov) mRNA, complete …	Gkn1	gastrokine 1	66283	56287	Mm.46414	NM_025466//NP_079742	5.56881	5.31177	3.12208	5.56341	7.27705	4.25506	3.20365	3.65068	3.6453	10.4622	10.8623	10.2697	3.42376	3.25015	3.24655	3.55123	5.62212	3.13913	9.35202	9.01548	9.48132	11.6199	11.5938	11.3129	1.33781	4.66755	5.69851	3.49988	10.5314	3.30682	9.28294	11.5089	0.854431
			#NUM!	0.55292	1.1254	1	0	17449301	NM_172880 // Tmprss11e // transmembrane protease, serine 11e // 5 E1|5 // 243084 /// ENSMUST00000161306 // Tmprss11e // transmembrane protease, serine 11e // 5 E1|5 // 243084 /// AY787860 // Tmprss11e // transmembrane protease, serine 11e // 5 E1|5 // 243084 /// BC115432 // Tmprss11e // transmembrane protease, serine 11e // 5 E1|5 // 243084 /// BC115433 // Tmprss11e // transmembrane protease, ser…	NM_172880 // RefSeq // Mus musculus transmembrane protease, serine 11e (Tmprss11e), mRNA. // chr5 // 100 // 100 // 24 // 24 // 1 /// ENSMUST00000161306 // ENSEMBL // ensembl_havana_transcript:known chromosome:GRCm38:5:86705186:86745815:-1 gene:ENSMUSG00000054537 gene_biotype:protein_coding transcript_biotype:protein_coding // chr5 // 100 // 100 // 24 // 24 // 1 /// AY787860 // GenBank // Mus musc…	Tmprss11e	transmembrane protease, serine 11e	243084	28983	Mm.130801	NM_172880//NP_766468	2.30192	2.52089	3.08661	2.2544	2.0045	2.91321	2.06756	2.21777	2.58365	7.75606	8.37671	7.94636	2.99987	3.34885	2.89502	2.49234	2.18479	2.8038	5.24373	5.66733	5.83925	4.73604	5.34305	4.95673	-0.253362	2.63647	2.39071	2.28966	8.02638	3.08124	5.58344	5.01194	0.12247
6.52051e-10	4.45739	4.45739	2.1562				#NUM!	17344349	NM_001033366 // Dpcr1 // diffuse panbronchiolitis critical region 1 (human) // 17 B1|17 // 268949 /// XM_006524336 // Dpcr1 // diffuse panbronchiolitis critical region 1 (human) // 17 B1|17 // 268949 /// ENSMUST00000095467 // Dpcr1 // diffuse panbronchiolitis critical region 1 (human) // 17 B1|17 // 268949 /// BC150798 // Dpcr1 // diffuse panbronchiolitis critical region 1 (human) // 17 B1|17 // …	NM_001033366 // RefSeq // Mus musculus diffuse panbronchiolitis critical region 1 (human) (Dpcr1), mRNA. // chr17 // 100 // 100 // 21 // 21 // 0 /// XM_006524336 // RefSeq // PREDICTED: Mus musculus diffuse panbronchiolitis critical region 1 (human) (Dpcr1), transcript variant X1, mRNA. // chr17 // 100 // 71 // 15 // 15 // 0 /// ENSMUST00000095467 // ENSEMBL // ensembl_havana_transcript:known chr…	Dpcr1	diffuse panbronchiolitis critical region 1 (human)	268949	135656	Mm.296301	NM_001033366//NP_001028538//XM_006524336//XP_006524399	2.98892	3.83683	2.69597	5.25382	7.35532	4.91198	2.93331	2.51186	2.62281	11.2406	11.2166	11.3048	3.0547	2.39212	2.8514	2.91247	6.61624	2.42369	7.91603	8.28364	8.66629	11.793	11.7531	11.4977	0.353001	3.17391	5.84037	2.68933	11.254	2.76607	8.28865	11.6812	0.453316
			#NUM!				#NUM!	17306991	NM_010372 // Gzmd // granzyme D // 14 C3|14 28.19 cM // 14941 /// ENSMUST00000082093 // Gzmd // granzyme D // 14 C3|14 28.19 cM // 14941 /// BC141122 // Gzmd // granzyme D // 14 C3|14 28.19 cM // 14941 /// BC145433 // Gzmd // granzyme D // 14 C3|14 28.19 cM // 14941 /// J03255 // Gzmd // granzyme D // 14 C3|14 28.19 cM // 14941	NM_010372 // RefSeq // Mus musculus granzyme D (Gzmd), mRNA. // chr14 // 100 // 100 // 10 // 10 // 0 /// ENSMUST00000082093 // ENSEMBL // ensembl_havana_transcript:known chromosome:GRCm38:14:56129556:56132608:-1 gene:ENSMUSG00000059256 gene_biotype:protein_coding transcript_biotype:protein_coding // chr14 // 100 // 100 // 10 // 10 // 0 /// BC141122 // GenBank // Mus musculus granzyme D, mRNA (cDN…	Gzmd	granzyme D	14941	#N/A	Mm.482071	NM_010372//NP_034502//XM_006518569//XP_006518632	2.28007	2.12168	2.45172	2.36545	2.24793	2.19736	2.14353	2.09549	2.02941	8.00104	7.30874	8.02103	2.50128	1.91788	2.09011	1.84385	1.95285	2.28571	1.78393	1.80168	1.96897	2.1473	2.5574	2.41655	-0.199864	2.28449	2.27025	2.08948	7.77694	2.16975	1.85153	2.37375	0.0584646
3.87465e-05	2.47095	2.47095	1.30507	0.0587941	2.25424	1	0	17308099	NM_010082 // Adam28 // a disintegrin and metallopeptidase domain 28 // 14 D2|14 // 13522 /// NM_183366 // Adam28 // a disintegrin and metallopeptidase domain 28 // 14 D2|14 // 13522 /// XM_006518511 // Adam28 // a disintegrin and metallopeptidase domain 28 // 14 D2|14 // 13522 /// ENSMUST00000022642 // Adam28 // a disintegrin and metallopeptidase domain 28 // 14 D2|14 // 13522 /// ENSMUST00000111…	NM_010082 // RefSeq // Mus musculus a disintegrin and metallopeptidase domain 28 (Adam28), transcript variant 1, mRNA. // chr14 // 100 // 96 // 23 // 23 // 0 /// NM_183366 // RefSeq // Mus musculus a disintegrin and metallopeptidase domain 28 (Adam28), transcript variant 2, mRNA. // chr14 // 100 // 96 // 23 // 23 // 0 /// XM_006518511 // RefSeq // PREDICTED: Mus musculus a disintegrin and metallo…	Adam28	a disintegrin and metallopeptidase domain 28	13522	10863	Mm.117450	NM_001048175//NM_010082//NM_176991//NM_183366//NP_001041640//NP_034212//NP_899222//NR_102399//XM_006518511//XM_006518512//XM_006518513//XM_006518514//XP_006518574//XP_006518575//XP_006518576//XP_006518577	3.51111	3.39993	3.44175	3.58927	5.09907	4.3086	3.16147	2.93857	3.4166	9.84269	9.77845	9.62129	2.87207	3.17911	3.09253	3.34542	4.49517	3.25542	8.10034	8.04633	7.74976	8.39426	8.20571	8.55006	0.0574377	3.45093	4.33231	3.17221	9.74748	3.0479	7.96547	8.38335	0.133739
0.049995	1.32174	1	0				#NUM!	17258168	NM_027132 // Otop3 // otopetrin 3 // 11 E2|11 // 69602 /// ENSMUST00000019006 // Otop3 // otopetrin 3 // 11 E2|11 // 69602 /// ENSMUST00000106543 // Otop3 // otopetrin 3 // 11 E2|11 // 69602 /// BC145613 // Otop3 // otopetrin 3 // 11 E2|11 // 69602 /// BC150803 // Otop3 // otopetrin 3 // 11 E2|11 // 69602	NM_027132 // RefSeq // Mus musculus otopetrin 3 (Otop3), mRNA. // chr11 // 100 // 100 // 21 // 21 // 0 /// ENSMUST00000019006 // ENSEMBL // ensembl:known chromosome:GRCm38:11:115334734:115346926:1 gene:ENSMUSG00000018862 gene_biotype:protein_coding transcript_biotype:protein_coding // chr11 // 100 // 100 // 21 // 21 // 0 /// ENSMUST00000106543 // ENSEMBL // havana:known chromosome:GRCm38:11:11533…	Otop3	otopetrin 3	69602	347741	Mm.101844	NM_027132//NP_081408//XM_006534116//XM_006534117//XM_006534118//XP_006534179//XP_006534180//XP_006534181	1.83742	2.44617	2.51585	1.99445	2.40172	2.11349	2.28663	2.21896	2.4948	8.27861	7.29891	7.65489	2.4903	2.47716	2.17412	2.41448	2.3786	2.53027	2.98735	2.88977	3.08841	4.58406	6.03497	5.86338	-0.408938	2.26648	2.16989	2.33346	7.74413	2.38053	2.98851	5.49414	0.096344
			#NUM!				#NUM!	17306999	NM_010375 // Gzmg // granzyme G // 14 C3|14 28.19 cM // 14944 /// ENSMUST00000015578 // Gzmg // granzyme G // 14 C3|14 28.19 cM // 14944 /// BC099473 // Gzmg // granzyme G // 14 C3|14 28.19 cM // 14944 /// J02872 // Gzmg // granzyme G // 14 C3|14 28.19 cM // 14944	NM_010375 // RefSeq // Mus musculus granzyme G (Gzmg), mRNA. // chr14 // 100 // 100 // 13 // 13 // 0 /// ENSMUST00000015578 // ENSEMBL // ensembl:known chromosome:GRCm38:14:56156582:56159579:-1 gene:ENSMUSG00000040284 gene_biotype:protein_coding transcript_biotype:protein_coding // chr14 // 100 // 100 // 13 // 13 // 0 /// BC099473 // GenBank // Mus musculus granzyme G, mRNA (cDNA clone MGC:117682…	Gzmg	granzyme G	14944	#N/A	Mm.14868	NM_010375//NP_034505	2.40942	2.75087	2.04258	2.47033	2.42403	3.47807	2.18154	2.0143	2.17508	7.78479	7.67644	8.02755	2.30964	2.05598	2.3818	2.21508	2.3251	2.60411	2.27265	1.90377	2.16172	1.99706	3.19454	2.39409	-0.415976	2.40096	2.79081	2.12364	7.8296	2.24914	2.11271	2.52857	0.110168
1.35371e-12	0.0877183	0.0877183	-3.51098				#NUM!	17484477	NM_009475 // Prap1 // proline-rich acidic protein 1 // 7|7 F5 // 22264 /// ENSMUST00000026540 // Prap1 // proline-rich acidic protein 1 // 7|7 F5 // 22264 /// BC051092 // Prap1 // proline-rich acidic protein 1 // 7|7 F5 // 22264 /// U28486 // Prap1 // proline-rich acidic protein 1 // 7|7 F5 // 22264	NM_009475 // RefSeq // Mus musculus proline-rich acidic protein 1 (Prap1), mRNA. // chr7 // 100 // 100 // 22 // 22 // 1 /// ENSMUST00000026540 // ENSEMBL // ensembl_havana_transcript:known chromosome:GRCm38:7:140093395:140097200:1 gene:ENSMUSG00000025467 gene_biotype:protein_coding transcript_biotype:protein_coding // chr7 // 100 // 100 // 22 // 22 // 1 /// BC051092 // GenBank // Mus musculus pro…	Prap1	proline-rich acidic protein 1	22264	118471	Mm.439707	NM_009475//NP_033501	6.55843	6.95695	7.06563	6.67514	5.93185	6.81688	5.40746	5.45775	5.83328	10.9176	9.67286	10.3698	3.71392	4.23486	4.4739	6.48354	6.31513	4.1576	3.52907	3.44264	4.25565	4.30121	3.6246	3.84985	-0.645691	6.86034	6.47462	5.56616	10.3201	4.14089	3.74245	3.92522	0.178326
7.41744e-06	3.51851	3.51851	1.81497	0.139814	0.720851	1	0	17514553	NM_008611 // Mmp8 // matrix metallopeptidase 8 // 9 A1|9 // 17394 /// ENSMUST00000018765 // Mmp8 // matrix metallopeptidase 8 // 9 A1|9 // 17394 /// BC042742 // Mmp8 // matrix metallopeptidase 8 // 9 A1|9 // 17394 /// U96696 // Mmp8 // matrix metallopeptidase 8 // 9 A1|9 // 17394	NM_008611 // RefSeq // Mus musculus matrix metallopeptidase 8 (Mmp8), mRNA. // chr9 // 100 // 100 // 29 // 29 // 1 /// ENSMUST00000018765 // ENSEMBL // ensembl:known chromosome:GRCm38:9:7558429:7568486:1 gene:ENSMUSG00000005800 gene_biotype:protein_coding transcript_biotype:protein_coding // chr9 // 100 // 100 // 29 // 29 // 1 /// BC042742 // GenBank // Mus musculus matrix metallopeptidase 8, mRN…	Mmp8	matrix metallopeptidase 8	17394	4317	Mm.16415	NM_008611//NP_032637	3.19669	3.28417	3.20571	3.47613	3.54546	3.26777	2.68957	2.5907	3.06627	7.85638	7.26514	8.66415	4.30941	3.64012	3.74938	2.99114	3.57537	4.50895	6.82792	6.58807	4.49191	3.29124	2.96235	2.81511	-0.266784	3.22886	3.42979	2.78218	7.92856	3.89964	5.9693	3.0229	0.141661
			#NUM!				#NUM!	17337667	NM_001244651 // Esp15 // exocrine gland secreted peptide 15 // 17 B1|17 // 668200 /// ENSMUST00000178929 // Esp15 // exocrine gland secreted peptide 15 // 17 B1|17 // 668200 /// AB306993 // Esp15 // exocrine gland secreted peptide 15 // 17 B1|17 // 668200	NM_001244651 // RefSeq // Mus musculus exocrine gland secreted peptide 15 (Esp15), mRNA. // chr17 // 100 // 100 // 11 // 11 // 0 /// ENSMUST00000178929 // ENSEMBL // ensembl:known chromosome:GRCm38:17:39640957:39645666:1 gene:ENSMUSG00000095104 gene_biotype:protein_coding transcript_biotype:protein_coding // chr17 // 100 // 100 // 11 // 11 // 0 /// AB306993 // GenBank // Mus musculus Esp15 mRNA f…	Esp15	exocrine gland secreted peptide 15	668200	#N/A	Mm.464782	NM_001244651//NP_001231580	2.12643	3.68958	2.95655	2.73505	2.8801	3.11052	3.17344	3.03257	3.15683	7.20064	8.47552	8.10013	2.85319	3.20878	3.63068	2.91691	3.11172	3.3075	3.60963	3.2859	3.76234	2.53846	2.86418	2.70396	-0.224814	2.92418	2.90856	3.12095	7.92543	3.23088	3.55262	2.7022	0.246828
			#NUM!				#NUM!	17522369	NM_008694 // Ngp // neutrophilic granule protein // 9 F2|9 // 18054 /// ENSMUST00000035061 // Ngp // neutrophilic granule protein // 9 F2|9 // 18054 /// AK009649 // Ngp // neutrophilic granule protein // 9 F2|9 // 18054 /// BC119403 // Ngp // neutrophilic granule protein // 9 F2|9 // 18054 /// BC119405 // Ngp // neutrophilic granule protein // 9 F2|9 // 18054 /// L37297 // Ngp // neutrophilic gra…	NM_008694 // RefSeq // Mus musculus neutrophilic granule protein (Ngp), mRNA. // chr9 // 79 // 79 // 15 // 19 // 1 /// ENSMUST00000035061 // ENSEMBL // ensembl_havana_transcript:known chromosome:GRCm38:9:110419750:110423010:1 gene:ENSMUSG00000032484 gene_biotype:protein_coding transcript_biotype:protein_coding // chr9 // 100 // 100 // 19 // 19 // 1 /// AK009649 // GenBank HTC // Mus musculus adul…	Ngp	neutrophilic granule protein	18054	#N/A	Mm.236225	NM_008694//NP_032720	2.7874	2.84079	3.16332	2.55828	2.20658	2.59289	1.8001	2.23975	2.30604	6.77323	4.87146	7.6817	3.7327	3.35464	3.91604	2.49397	3.06998	3.36406	6.486	5.2665	3.50243	2.91538	2.22311	3.19149	-0.927039	2.9305	2.45258	2.1153	6.44213	3.66779	5.08498	2.77666	0.460238
			#NUM!				#NUM!	17307017	NM_010374 // Gzmf // granzyme F // 14 C3|14 28.19 cM // 14943 /// ENSMUST00000022757 // Gzmf // granzyme F // 14 C3|14 28.19 cM // 14943 /// BC100311 // Gzmf // granzyme F // 14 C3|14 28.19 cM // 14943 /// BC145435 // Gzmf // granzyme F // 14 C3|14 28.19 cM // 14943 /// J03257 // Gzmf // granzyme F // 14 C3|14 28.19 cM // 14943	NM_010374 // RefSeq // Mus musculus granzyme F (Gzmf), mRNA. // chr14 // 100 // 100 // 9 // 9 // 0 /// ENSMUST00000022757 // ENSEMBL // ensembl:known chromosome:GRCm38:14:56205266:56211407:-1 gene:ENSMUSG00000015441 gene_biotype:protein_coding transcript_biotype:protein_coding // chr14 // 100 // 100 // 9 // 9 // 0 /// BC100311 // GenBank // Mus musculus granzyme F, mRNA (cDNA clone MGC:117524 IMA…	Gzmf	granzyme F	14943	#N/A	Mm.457976	NM_010374//NP_034504	2.50684	1.58756	1.98857	1.91149	1.89012	2.71339	2.1317	2.34404	2.2617	7.5692	6.40894	7.43808	1.92426	1.57035	1.76865	1.54903	1.52517	2.17694	1.77782	1.59692	1.54213	1.7508	1.79584	1.86836	-0.39617	2.02766	2.17167	2.24581	7.13874	1.75442	1.63896	1.805	0.175862
0.103967	1.90476	1	0	0.49714	0.865188	1	0	17217383	NM_001284524 // Chit1 // chitinase 1 (chitotriosidase) // 1 E4|1 // 71884 /// NM_001284525 // Chit1 // chitinase 1 (chitotriosidase) // 1 E4|1 // 71884 /// NM_027979 // Chit1 // chitinase 1 (chitotriosidase) // 1 E4|1 // 71884 /// ENSMUST00000086475 // Chit1 // chitinase 1 (chitotriosidase) // 1 E4|1 // 71884 /// ENSMUST00000159963 // Chit1 // chitinase 1 (chitotriosidase) // 1 E4|1 // 71884 /// …	NM_001284524 // RefSeq // Mus musculus chitinase 1 (chitotriosidase) (Chit1), transcript variant 2, mRNA. // chr1 // 100 // 60 // 9 // 9 // 0 /// NM_001284525 // RefSeq // Mus musculus chitinase 1 (chitotriosidase) (Chit1), transcript variant 1, mRNA. // chr1 // 100 // 100 // 15 // 15 // 0 /// NM_027979 // RefSeq // Mus musculus chitinase 1 (chitotriosidase) (Chit1), transcript variant 3, mRNA. /…	Chit1	chitinase 1 (chitotriosidase)	71884	1118	Mm.328268	NM_001284524//NM_001284525//NM_027979//NP_001271453//NP_001271454//NP_082255//XM_006529879//XM_006529880//XM_006529881//XP_006529942//XP_006529943//XP_006529944	3.28688	3.39559	3.19872	2.79385	4.78234	3.20006	2.93082	3.32546	3.14986	8.47331	7.94081	7.91019	3.73772	3.88907	3.70284	3.14407	3.56721	4.0559	7.00099	7.06217	7.36816	6.04045	7.18046	6.53293	0.108944	3.29373	3.59208	3.13538	8.1081	3.77654	7.14377	6.58461	0.252533
0.00010028	3.46712	3.46712	1.79374	0.0459596	0.780145	1	0	17211305	NM_053191 // Pi15 // peptidase inhibitor 15 // 1|1 A4 // 94227 /// ENSMUST00000088476 // Pi15 // peptidase inhibitor 15 // 1|1 A4 // 94227 /// AF329196 // Pi15 // peptidase inhibitor 15 // 1|1 A4 // 94227 /// BC116705 // Pi15 // peptidase inhibitor 15 // 1|1 A4 // 94227	NM_053191 // RefSeq // Mus musculus peptidase inhibitor 15 (Pi15), mRNA. // chr1 // 100 // 100 // 21 // 21 // 0 /// ENSMUST00000088476 // ENSEMBL // ensembl_havana_transcript:known chromosome:GRCm38:1:17601901:17630939:1 gene:ENSMUSG00000067780 gene_biotype:protein_coding transcript_biotype:protein_coding // chr1 // 100 // 100 // 21 // 21 // 0 /// AF329196 // GenBank // Mus musculus SugarCrisp mR…	Pi15	peptidase inhibitor 15	94227	51050	Mm.442452	NM_053191//NP_444421	3.13779	3.83669	2.94568	4.00772	4.21815	4.18758	2.52281	2.69308	2.87854	8.09922	7.76213	8.46335	4.50961	5.25599	3.79183	3.68052	4.67121	4.3248	6.82145	7.15588	5.98572	4.04729	4.81766	3.88576	-0.282396	3.30672	4.13782	2.69814	8.10823	4.51914	6.65435	4.25023	0.18469
0.959558	0.991223	1	0	0.0194138	1.3056	1	0	17282970	NM_010050 // Dio2 // deiodinase, iodothyronine, type II // 12 D3|12 // 13371 /// ENSMUST00000082432 // Dio2 // deiodinase, iodothyronine, type II // 12 D3|12 // 13371 /// AF093137 // Dio2 // deiodinase, iodothyronine, type II // 12 D3|12 // 13371 /// AF096875 // Dio2 // deiodinase, iodothyronine, type II // 12 D3|12 // 13371 /// AF177196 // Dio2 // deiodinase, iodothyronine, type II // 12 D3|12 /…	NM_010050 // RefSeq // Mus musculus deiodinase, iodothyronine, type II (Dio2), mRNA. // chr12 // 100 // 100 // 18 // 18 // 0 /// ENSMUST00000082432 // ENSEMBL // ensembl:known chromosome:GRCm38:12:90724554:90738438:-1 gene:ENSMUSG00000007682 gene_biotype:protein_coding transcript_biotype:protein_coding // chr12 // 100 // 100 // 18 // 18 // 0 /// AF093137 // GenBank // Mus musculus type II deiodin…	Dio2	deiodinase, iodothyronine, type II	13371	1734	Mm.21389//Mm.408815	NM_010050//NP_034180	2.45642	3.15532	2.60384	2.38554	3.16336	2.66562	2.95788	2.67196	3.03252	7.78661	6.33851	8.22046	3.81689	5.87791	3.74248	3.09479	2.49211	3.92845	7.32352	7.39969	6.33775	3.02413	2.3292	3.15598	-0.659781	2.73853	2.73817	2.88745	7.44852	4.4791	7.02032	2.83644	0.553438
7.63248e-11	0.107964	0.107964	-3.21138	0.651624	0.875608	1	0	17327364	NM_133229 // Ripply3 // ripply3 homolog (zebrafish) // 16 C4|16 // 170765 /// ENSMUST00000023660 // Ripply3 // ripply3 homolog (zebrafish) // 16 C4|16 // 170765 /// AB063284 // Ripply3 // ripply3 homolog (zebrafish) // 16 C4|16 // 170765 /// BC060291 // Ripply3 // ripply3 homolog (zebrafish) // 16 C4|16 // 170765	NM_133229 // RefSeq // Mus musculus ripply3 homolog (zebrafish) (Ripply3), mRNA. // chr16 // 100 // 100 // 22 // 22 // 0 /// ENSMUST00000023660 // ENSEMBL // ensembl_havana_transcript:known chromosome:GRCm38:16:94328420:94336935:1 gene:ENSMUSG00000022941 gene_biotype:protein_coding transcript_biotype:protein_coding // chr16 // 100 // 100 // 22 // 22 // 0 /// AB063284 // GenBank // Mus musculus Ds…	Ripply3	ripply3 homolog (zebrafish)	170765	53820	Mm.42604	NM_133229//NP_573492	3.78991	4.35648	4.23686	3.89169	4.73173	4.44614	4.0532	4.24806	3.95859	9.55774	8.03087	9.02928	3.80398	3.36147	3.6545	3.92746	5.15181	3.92346	4.87911	4.48034	4.65057	4.88822	4.65592	4.95783	-0.634606	4.12775	4.35652	4.08662	8.87263	3.60665	4.67001	4.83399	0.189061
0.274754	1.35029	1	0	0.597644	0.94225	1	0	17391554	NM_010554 // Il1a // interleukin 1 alpha // 2 F|2 62.9 cM // 16175 /// XM_006498793 // Il1a // interleukin 1 alpha // 2 F|2 62.9 cM // 16175 /// XM_006498794 // Il1a // interleukin 1 alpha // 2 F|2 62.9 cM // 16175 /// ENSMUST00000028882 // Il1a // interleukin 1 alpha // 2 F|2 62.9 cM // 16175 /// X01450 // Il1a // interleukin 1 alpha // 2 F|2 62.9 cM // 16175 /// BC003727 // Il1a // interleukin …	NM_010554 // RefSeq // Mus musculus interleukin 1 alpha (Il1a), mRNA. // chr2 // 100 // 100 // 24 // 24 // 1 /// XM_006498793 // RefSeq // PREDICTED: Mus musculus interleukin 1 alpha (Il1a), transcript variant X2, mRNA. // chr2 // 88 // 88 // 21 // 24 // 1 /// XM_006498794 // RefSeq // PREDICTED: Mus musculus interleukin 1 alpha (Il1a), transcript variant X3, mRNA. // chr2 // 75 // 75 // 18 // 24…	Il1a	interleukin 1 alpha	16175	3552	Mm.15534	NM_010554//NP_034684//XM_006498792//XM_006498793//XM_006498794//XP_006498855//XP_006498856//XP_006498857	3.33398	2.60019	3.40496	3.98858	4.31664	3.35571	2.85854	2.82337	2.92572	8.06063	7.94423	8.49194	6.79058	6.18139	6.77087	2.60688	4.05742	6.49081	6.88961	6.64017	6.10818	3.6356	4.64747	4.18263	0.265414	3.11304	3.88698	2.86921	8.1656	6.58095	6.54599	4.15523	0.128581
0.0142181	2.08139	1	0	0.427172	0.831326	1	0	17400998	NM_178594 // Vtcn1 // V-set domain containing T cell activation inhibitor 1 // 3 F2.2|3 // 242122 /// ENSMUST00000054791 // Vtcn1 // V-set domain containing T cell activation inhibitor 1 // 3 F2.2|3 // 242122 /// AY346099 // Vtcn1 // V-set domain containing T cell activation inhibitor 1 // 3 F2.2|3 // 242122 /// AY280973 // Vtcn1 // V-set domain containing T cell activation inhibitor 1 // 3 F2.2|…	NM_178594 // RefSeq // Mus musculus V-set domain containing T cell activation inhibitor 1 (Vtcn1), mRNA. // chr3 // 100 // 100 // 26 // 26 // 1 /// ENSMUST00000054791 // ENSEMBL // ensembl_havana_transcript:known chromosome:GRCm38:3:100825459:100895679:1 gene:ENSMUSG00000051076 gene_biotype:protein_coding transcript_biotype:protein_coding // chr3 // 88 // 88 // 23 // 26 // 1 /// AY346099 // GenBa…	Vtcn1	V-set domain containing T cell activation inhibitor 1	242122	79679	Mm.137467	NM_178594//NP_848709	2.45048	2.90298	3.51633	4.3935	4.70043	4.32988	2.70021	2.72502	2.54862	8.9975	8.05359	8.8808	6.47859	7.1534	6.48643	3.35971	4.70536	6.62189	7.83935	7.59421	7.81638	4.06338	3.99842	4.43816	-0.475887	2.9566	4.47461	2.65795	8.64396	6.70614	7.74998	4.16665	0.149881
0.212248	1.34153	1	0	0.032095	1.4634	1	0	17456381	NM_001081306 // Ptprz1 // protein tyrosine phosphatase, receptor type Z, polypeptide 1 // 6 A3.1|6 // 19283 /// ENSMUST00000090568 // Ptprz1 // protein tyrosine phosphatase, receptor type Z, polypeptide 1 // 6 A3.1|6 // 19283 /// BC151071 // Ptprz1 // protein tyrosine phosphatase, receptor type Z, polypeptide 1 // 6 A3.1|6 // 19283 /// BC157965 // Ptprz1 // protein tyrosine phosphatase, receptor …	NM_001081306 // RefSeq // Mus musculus protein tyrosine phosphatase, receptor type Z, polypeptide 1 (Ptprz1), mRNA. // chr6 // 100 // 100 // 27 // 27 // 1 /// ENSMUST00000090568 // ENSEMBL // ensembl:known chromosome:GRCm38:6:22875502:23052916:1 gene:ENSMUSG00000068748 gene_biotype:protein_coding transcript_biotype:protein_coding // chr6 // 100 // 100 // 27 // 27 // 1 /// BC151071 // GenBank // M…	Ptprz1	protein tyrosine phosphatase, receptor type Z, polypeptide 1	19283	5803	Mm.41639	NM_001081306//NM_011219//NM_178180//NP_001074775//XM_006505012//XM_006505013//XM_006505014//XM_006505015//XM_006505016//XM_006505017//XM_006505018//XP_006505075//XP_006505076//XP_006505077//XP_006505078//XP_006505079//XP_006505080//XP_006505081	3.96164	4.2955	4.06262	3.28031	3.56047	3.12061	3.33323	3.27439	3.44738	6.45907	7.64003	6.43279	6.37156	7.33324	6.31615	3.92604	3.30027	6.48931	7.82824	7.82378	7.59873	5.14377	5.17494	4.71624	0.425485	4.10659	3.32046	3.35166	6.84396	6.67365	7.75025	5.01165	0.17783
1.47601e-11	16.9119	16.9119	4.07997	0.0283261	1.87458	1	0	17497980	NM_181729 // Muc6 // mucin 6, gastric // 7 F5|7 87.03 cM // 353328 /// ENSMUST00000062451 // Muc6 // mucin 6, gastric // 7 F5|7 87.03 cM // 353328 /// BC120907 // Muc6 // mucin 6, gastric // 7 F5|7 87.03 cM // 353328	NM_181729 // RefSeq // Mus musculus mucin 6, gastric (Muc6), mRNA. // chr7 // 94 // 94 // 29 // 31 // 1 /// ENSMUST00000062451 // ENSEMBL // ensembl:known chromosome:GRCm38:7:141633972:141655319:-1 gene:ENSMUSG00000048191 gene_biotype:protein_coding transcript_biotype:protein_coding // chr7 // 100 // 100 // 31 // 31 // 1 /// BC120907 // GenBank // Mus musculus mucin 6, gastric, mRNA (cDNA clone M…	Muc6	mucin 6, gastric	353328	4588	Mm.246621	NM_181729//NP_859418	2.83621	3.2999	3.19207	3.63129	4.7601	3.05896	2.86492	3.08306	3.18766	8.21833	7.30141	8.44394	5.32293	6.65358	4.66956	4.19091	3.35734	5.55634	10.1393	10.3981	8.88148	10.9568	10.9504	10.7593	-0.100925	3.10939	3.81678	3.04521	7.98789	5.54869	9.8063	10.8888	0.444751
0.00150349	1.86344	1.86344	0.897972	0.0191818	2.03892	1	0	17276934	NM_001033149 // Ttc9 // tetratricopeptide repeat domain 9 // 12 D1|12 // 69480 /// ENSMUST00000036116 // Ttc9 // tetratricopeptide repeat domain 9 // 12 D1|12 // 69480 /// AK172918 // Ttc9 // tetratricopeptide repeat domain 9 // 12 D1|12 // 69480 /// BC139242 // Ttc9 // tetratricopeptide repeat domain 9 // 12 D1|12 // 69480 /// BC139244 // Ttc9 // tetratricopeptide repeat domain 9 // 12 D1|12 // …	NM_001033149 // RefSeq // Mus musculus tetratricopeptide repeat domain 9 (Ttc9), mRNA. // chr12 // 100 // 81 // 17 // 17 // 0 /// ENSMUST00000036116 // ENSEMBL // ensembl:known chromosome:GRCm38:12:81631369:81664941:1 gene:ENSMUSG00000042734 gene_biotype:protein_coding transcript_biotype:protein_coding // chr12 // 100 // 81 // 17 // 17 // 0 /// AK172918 // GenBank // Mus musculus mRNA for mKIAA02…	Ttc9	tetratricopeptide repeat domain 9	69480	23508	Mm.130002	NM_001033149//NP_001028321//XM_006516202//XP_006516265	3.66873	3.02576	3.85498	3.65663	3.52181	3.41183	2.42094	3.04839	2.84833	7.21405	7.13856	6.62572	4.30432	4.20091	3.87677	2.60579	3.67595	4.43572	5.58359	5.26559	4.69839	3.23818	3.14827	3.85068	0.208141	3.51649	3.53009	2.77255	6.99278	4.12734	5.18253	3.41237	0.0918561
			#NUM!				#NUM!	17438963	NM_023785 // Ppbp // pro-platelet basic protein // 5 E1|5 // 57349 /// ENSMUST00000031319 // Ppbp // pro-platelet basic protein // 5 E1|5 // 57349 /// AB042817 // Ppbp // pro-platelet basic protein // 5 E1|5 // 57349 /// AF219112 // Ppbp // pro-platelet basic protein // 5 E1|5 // 57349 /// AF278700 // Ppbp // pro-platelet basic protein // 5 E1|5 // 57349 /// BC127043 // Ppbp // pro-platelet basic…	NM_023785 // RefSeq // Mus musculus pro-platelet basic protein (Ppbp), mRNA. // chr5 // 100 // 100 // 21 // 21 // 1 /// ENSMUST00000031319 // ENSEMBL // ensembl:known chromosome:GRCm38:5:90768518:90770060:1 gene:ENSMUSG00000029372 gene_biotype:protein_coding transcript_biotype:protein_coding // chr5 // 100 // 100 // 21 // 21 // 1 /// AB042817 // GenBank // Mus musculus mRNA for chemokine subfamil…	Ppbp	pro-platelet basic protein	57349	#N/A	Mm.293614	NM_023785//NP_076274	3.11988	2.65955	3.04892	3.11069	3.64727	2.80683	2.91163	2.71428	2.85448	7.02494	6.63504	7.94872	3.15458	2.97956	2.80363	2.67664	3.02196	2.91734	4.32928	4.24076	4.57726	3.83166	4.22229	3.97003	-0.0046646	2.94278	3.18826	2.8268	7.2029	2.97926	4.38243	4.00799	0.147763
0.000237908	3.80778	3.80778	1.92895				#NUM!	17487945	NM_153576 // Cxcl17 // chemokine (C-X-C motif) ligand 17 // 7 A3|7 // 232983 /// ENSMUST00000074040 // Cxcl17 // chemokine (C-X-C motif) ligand 17 // 7 A3|7 // 232983 /// AY598463 // Cxcl17 // chemokine (C-X-C motif) ligand 17 // 7 A3|7 // 232983 /// BC024561 // Cxcl17 // chemokine (C-X-C motif) ligand 17 // 7 A3|7 // 232983 /// AY374329 // Cxcl17 // chemokine (C-X-C motif) ligand 17 // 7 A3|7 //…	NM_153576 // RefSeq // Mus musculus chemokine (C-X-C motif) ligand 17 (Cxcl17), mRNA. // chr7 // 100 // 100 // 24 // 24 // 1 /// ENSMUST00000074040 // ENSEMBL // ensembl:known chromosome:GRCm38:7:25400053:25412886:-1 gene:ENSMUSG00000060188 gene_biotype:protein_coding transcript_biotype:protein_coding // chr7 // 100 // 100 // 24 // 24 // 1 /// AY598463 // GenBank // Mus musculus VEGF co-regulated…	Cxcl17	chemokine (C-X-C motif) ligand 17	232983	284340	Mm.10545	NM_153576//NP_705804	3.23867	2.92485	3.81816	3.37112	3.8838	3.44364	3.20466	3.18443	2.79878	7.75504	7.15011	7.34408	3.39636	3.31031	2.92948	3.44278	3.26758	3.00812	6.594	5.96592	5.79229	9.03195	8.73943	8.58455	-0.116154	3.32723	3.56618	3.06262	7.41641	3.21205	6.1174	8.78531	0.0983623
			#NUM!				#NUM!	17325324	NM_173869 // Stfa2l1 // stefin A2 like 1 // 16 B3|16 // 268885 /// ENSMUST00000079184 // Stfa2l1 // stefin A2 like 1 // 16 B3|16 // 268885 /// AY163161 // Stfa2l1 // stefin A2 like 1 // 16 B3|16 // 268885 /// BC117052 // Stfa2l1 // stefin A2 like 1 // 16 B3|16 // 268885 /// BC119354 // Stfa2l1 // stefin A2 like 1 // 16 B3|16 // 268885	NM_173869 // RefSeq // Mus musculus stefin A2 like 1 (Stfa2l1), mRNA. // chr16 // 100 // 100 // 18 // 18 // 0 /// ENSMUST00000079184 // ENSEMBL // ensembl:known chromosome:GRCm38:16:36156811:36161948:1 gene:ENSMUSG00000059657 gene_biotype:protein_coding transcript_biotype:protein_coding // chr16 // 100 // 100 // 18 // 18 // 0 /// AY163161 // GenBank // Mus musculus stefin A2 protein mRNA, complet…	Stfa2l1	stefin A2 like 1	268885	#N/A	Mm.187847	NM_173869//NP_776294	2.44602	2.3841	2.67019	2.69098	2.41118	3.02845	2.20923	2.76807	1.78088	6.25858	5.57981	7.86232	5.00004	4.11539	3.54906	2.31976	2.95422	5.10136	6.87219	5.96243	4.74846	2.69911	2.47045	3.66602	-0.679712	2.5001	2.7102	2.25273	6.5669	4.2215	5.86102	2.9452	0.454357
0.0292421	0.618696	1	0	0.018511	0.611504	1	0	17482310	NM_016870 // Acsm3 // acyl-CoA synthetase medium-chain family member 3 // 7|7 F3 // 20216 /// NM_212441 // Acsm3 // acyl-CoA synthetase medium-chain family member 3 // 7|7 F3 // 20216 /// NM_212442 // Acsm3 // acyl-CoA synthetase medium-chain family member 3 // 7|7 F3 // 20216 /// ENSMUST00000063770 // Acsm3 // acyl-CoA synthetase medium-chain family member 3 // 7|7 F3 // 20216 /// ENSMUST0000010…	NM_016870 // RefSeq // Mus musculus acyl-CoA synthetase medium-chain family member 3 (Acsm3), transcript variant 1, mRNA. // chr7 // 85 // 85 // 28 // 33 // 1 /// NM_212441 // RefSeq // Mus musculus acyl-CoA synthetase medium-chain family member 3 (Acsm3), transcript variant 2, mRNA. // chr7 // 85 // 85 // 28 // 33 // 1 /// NM_212442 // RefSeq // Mus musculus acyl-CoA synthetase medium-chain fami…	Acsm3	acyl-CoA synthetase medium-chain family member 3	20216	6296	Mm.334199	NM_016870//NM_212441//NM_212442//NP_058566//NP_997606//NP_997607//XM_006507472//XM_006507473//XM_006507474//XM_006507475//XM_006507476//XP_006507535//XP_006507536//XP_006507537//XP_006507538//XP_006507539	6.35756	8.49068	6.69805	4.98469	5.29486	4.65735	7.27184	7.08051	7.1449	8.98754	9.27265	8.74018	5.84941	5.4615	6.76251	7.45085	5.43006	6.02468	7.64163	7.54179	8.05398	7.44428	7.36994	6.65443	-0.115197	7.1821	4.97897	7.16575	9.00012	6.02447	7.7458	7.15622	0.388304
			#NUM!				#NUM!	17293362	NM_001145799 // Ctla2a // cytotoxic T lymphocyte-associated protein 2 alpha // 13 B2|13 32.56 cM // 13024 /// NM_007796 // Ctla2a // cytotoxic T lymphocyte-associated protein 2 alpha // 13 B2|13 32.56 cM // 13024 /// ENSMUST00000021880 // Ctla2a // cytotoxic T lymphocyte-associated protein 2 alpha // 13 B2|13 32.56 cM // 13024 /// AK018801 // Ctla2a // cytotoxic T lymphocyte-associated protein 2 …	NM_001145799 // RefSeq // Mus musculus cytotoxic T lymphocyte-associated protein 2 alpha (Ctla2a), transcript variant 2, mRNA. // chr13 // 100 // 83 // 10 // 10 // 0 /// NM_007796 // RefSeq // Mus musculus cytotoxic T lymphocyte-associated protein 2 alpha (Ctla2a), transcript variant 1, mRNA. // chr13 // 100 // 100 // 12 // 12 // 0 /// ENSMUST00000021880 // ENSEMBL // ensembl:known chromosome:GRC…	Ctla2a	cytotoxic T lymphocyte-associated protein 2 alpha	13024	#N/A	Mm.482089	NM_001145799//NM_007796//NP_001139271//NP_031822	5.04743	6.98462	5.74407	5.1928	5.48107	5.78513	6.25365	5.56446	5.6874	9.42277	8.92726	9.84539	7.76227	8.04856	7.86626	6.73067	6.61592	7.98201	10.1743	9.50126	6.93117	5.17171	5.19042	5.40445	-0.823977	5.92537	5.48633	5.83517	9.39848	7.89236	8.8689	5.25553	0.283573
5.04578e-09	5.32694	5.32694	2.41331	0.0496281	1.93359	1	0	17399823	NM_013650 // S100a8 // S100 calcium binding protein A8 (calgranulin A) // 3 F1-F2|3 39.9 cM // 20201 /// ENSMUST00000069927 // S100a8 // S100 calcium binding protein A8 (calgranulin A) // 3 F1-F2|3 39.9 cM // 20201 /// BC078629 // S100a8 // S100 calcium binding protein A8 (calgranulin A) // 3 F1-F2|3 39.9 cM // 20201 /// M83218 // S100a8 // S100 calcium binding protein A8 (calgranulin A) // 3 F1-…	NM_013650 // RefSeq // Mus musculus S100 calcium binding protein A8 (calgranulin A) (S100a8), mRNA. // chr3 // 100 // 100 // 23 // 23 // 1 /// ENSMUST00000069927 // ENSEMBL // ensembl:known chromosome:GRCm38:3:90669071:90670034:1 gene:ENSMUSG00000056054 gene_biotype:protein_coding transcript_biotype:protein_coding // chr3 // 100 // 100 // 23 // 23 // 1 /// BC078629 // GenBank // Mus musculus S100…	S100a8	S100 calcium binding protein A8 (calgranulin A)	20201	6279	Mm.21567	NM_013650//NP_038678	1.92585	2.53486	2.58578	3.12991	2.65639	3.25406	2.38567	2.64765	2.57557	7.08075	6.36332	7.99725	4.04462	3.73102	3.46643	2.50925	3.78549	3.89373	6.65564	5.61905	4.33174	2.24893	2.21551	2.67149	-0.723687	2.34883	3.01345	2.53629	7.14711	3.74735	5.53548	2.37864	0.201427
0.000287036	2.08035	2.08035	1.05683	0.0228069	1.73127	1	0	17354367	NM_001286181 // Lox // lysyl oxidase // 18 D1|18 28.22 cM // 16948 /// NM_001286182 // Lox // lysyl oxidase // 18 D1|18 28.22 cM // 16948 /// NM_010728 // Lox // lysyl oxidase // 18 D1|18 28.22 cM // 16948 /// ENSMUST00000025409 // Lox // lysyl oxidase // 18 D1|18 28.22 cM // 16948 /// ENSMUST00000171470 // Lox // lysyl oxidase // 18 D1|18 28.22 cM // 16948 /// BC018439 // Lox // lysyl oxidase //…	NM_001286181 // RefSeq // Mus musculus lysyl oxidase (Lox), transcript variant 2, mRNA. // chr18 // 76 // 76 // 19 // 25 // 1 /// NM_001286182 // RefSeq // Mus musculus lysyl oxidase (Lox), transcript variant 3, mRNA. // chr18 // 88 // 88 // 22 // 25 // 1 /// NM_010728 // RefSeq // Mus musculus lysyl oxidase (Lox), transcript variant 1, mRNA. // chr18 // 88 // 88 // 22 // 25 // 1 /// ENSMUST00000…	Lox	lysyl oxidase	16948	4015	Mm.172//Mm.488403	NM_001286181//NM_001286182//NM_010728//NP_001273110//NP_001273111//NP_034858	3.47282	4.93507	4.13676	4.47794	4.82573	4.16956	4.38551	4.13804	4.07003	8.06721	8.28841	8.93375	6.45976	6.91388	6.26072	3.73943	5.0883	6.52222	7.91359	7.90639	7.16909	5.26626	5.71045	5.21466	-0.264299	4.18155	4.49108	4.19786	8.42979	6.54479	7.66302	5.39712	0.197234
0.116314	1.75823	1	0	0.00150119	4.24516	4.24516	2.08582	17343176	NM_009362 // Tff1 // trefoil factor 1 // 17 A3.3|17 15.8 cM // 21784 /// ENSMUST00000024831 // Tff1 // trefoil factor 1 // 17 A3.3|17 15.8 cM // 21784 /// BC117054 // Tff1 // trefoil factor 1 // 17 A3.3|17 15.8 cM // 21784 /// BC117056 // Tff1 // trefoil factor 1 // 17 A3.3|17 15.8 cM // 21784	NM_009362 // RefSeq // Mus musculus trefoil factor 1 (Tff1), mRNA. // chr17 // 100 // 100 // 19 // 19 // 0 /// ENSMUST00000024831 // ENSEMBL // ensembl_havana_transcript:known chromosome:GRCm38:17:31161396:31165053:-1 gene:ENSMUSG00000024032 gene_biotype:protein_coding transcript_biotype:protein_coding // chr17 // 100 // 100 // 19 // 19 // 0 /// BC117054 // GenBank // Mus musculus trefoil factor …	Tff1	trefoil factor 1	21784	7031	Mm.2854	NM_009362//NP_033388//XM_006524030//XP_006524093	4.25805	4.60861	3.03112	5.44018	6.24698	4.93887	2.89604	3.64908	3.85581	8.63473	9.20615	8.87561	3.75361	3.63375	3.27028	2.8105	4.70805	3.44125	5.57654	5.52701	5.04018	9.8075	9.7072	9.55279	0.597956	3.96593	5.54201	3.46698	8.9055	3.55255	5.38125	9.68916	0.304498
0.0227494	1.75683	1	0				#NUM!	17423577	NM_175406 // Atp6v0d2 // ATPase, H+ transporting, lysosomal V0 subunit D2 // 4 A3|4 // 242341 /// ENSMUST00000029900 // Atp6v0d2 // ATPase, H+ transporting, lysosomal V0 subunit D2 // 4 A3|4 // 242341 /// AB088358 // Atp6v0d2 // ATPase, H+ transporting, lysosomal V0 subunit D2 // 4 A3|4 // 242341 /// AY145896 // Atp6v0d2 // ATPase, H+ transporting, lysosomal V0 subunit D2 // 4 A3|4 // 242341 /// …	NM_175406 // RefSeq // Mus musculus ATPase, H+ transporting, lysosomal V0 subunit D2 (Atp6v0d2), mRNA. // chr4 // 81 // 81 // 17 // 21 // 1 /// ENSMUST00000029900 // ENSEMBL // ensembl_havana_transcript:known chromosome:GRCm38:4:19876841:19922605:-1 gene:ENSMUSG00000028238 gene_biotype:protein_coding transcript_biotype:protein_coding // chr4 // 90 // 90 // 19 // 21 // 1 /// AB088358 // GenBank //…	Atp6v0d2	ATPase, H+ transporting, lysosomal V0 subunit D2	242341	245972	Mm.19298	NM_175406//NP_780615	3.52356	3.58088	3.41567	3.30174	2.8862	2.99864	2.75923	5.43429	3.41972	8.1209	6.18239	7.53416	5.48158	3.96788	6.67344	2.0976	2.63117	5.46419	3.76279	4.36363	4.02908	5.16977	6.32197	6.95929	-0.508175	3.5067	3.0622	3.87108	7.27915	5.3743	4.05183	6.15035	0.964378
0.0115907	1.76408	1	0	0.768187	0.959638	1	0	17244864	NM_001081035 // Nav3 // neuron navigator 3 // 10 D1|10 // 260315 /// XM_006513681 // Nav3 // neuron navigator 3 // 10 D1|10 // 260315 /// ENSMUST00000032719 // Nav3 // neuron navigator 3 // 10 D1|10 // 260315 /// ENSMUST00000161582 // Nav3 // neuron navigator 3 // 10 D1|10 // 260315 /// AK122404 // Nav3 // neuron navigator 3 // 10 D1|10 // 260315	NM_001081035 // RefSeq // Mus musculus neuron navigator 3 (Nav3), mRNA. // chr10 // 100 // 94 // 30 // 30 // 0 /// XM_006513681 // RefSeq // PREDICTED: Mus musculus neuron navigator 3 (Nav3), transcript variant X7, mRNA. // chr10 // 100 // 72 // 23 // 23 // 0 /// ENSMUST00000032719 // ENSEMBL // ensembl_havana_transcript:known chromosome:GRCm38:10:109682660:110000219:-1 gene:ENSMUSG00000020181 ge…	Nav3	neuron navigator 3	260315	89795	Mm.225050//Mm.394160//Mm.461280	NM_001081035//NM_177797//NP_001074504//XM_006513675//XM_006513676//XM_006513677//XM_006513678//XM_006513679//XM_006513680//XM_006513681//XP_006513738//XP_006513739//XP_006513740//XP_006513741//XP_006513742//XP_006513743//XP_006513744	3.46865	3.52872	3.48937	3.31111	3.46155	3.00804	2.99645	2.99783	3.22882	6.33588	6.80494	6.86147	4.4751	5.69685	4.18402	3.43822	3.42362	4.50862	5.83004	5.6145	5.52981	3.915	3.71412	4.02481	0.181383	3.49558	3.26023	3.07437	6.66743	4.78532	5.65812	3.88464	0.159954
0.0012306	0.409091	0.409091	-1.2895				#NUM!	17381879	ENSMUST00000003509 // St8sia6 // ST8 alpha-N-acetyl-neuraminide alpha-2,8-sialyltransferase 6 // 2 A1|2 // 241230 /// NM_145838 // St8sia6 // ST8 alpha-N-acetyl-neuraminide alpha-2,8-sialyltransferase 6 // 2 A1|2 // 241230 /// ENSMUST00000150781 // St8sia6 // ST8 alpha-N-acetyl-neuraminide alpha-2,8-sialyltransferase 6 // 2 A1|2 // 241230 /// AB059554 // St8sia6 // ST8 alpha-N-acetyl-neuraminide …	ENSMUST00000003509 // ENSEMBL // ensembl_havana_transcript:known chromosome:GRCm38:2:13651020:13793808:-1 gene:ENSMUSG00000003418 gene_biotype:protein_coding transcript_biotype:protein_coding // chr2 // 90 // 90 // 27 // 30 // 1 /// NM_145838 // RefSeq // Mus musculus ST8 alpha-N-acetyl-neuraminide alpha-2,8-sialyltransferase 6 (St8sia6), mRNA. // chr2 // 73 // 73 // 22 // 30 // 1 /// ENSMUST0000…	St8sia6	ST8 alpha-N-acetyl-neuraminide alpha-2,8-sialyltransferase 6	241230	338596	Mm.330004//Mm.393036	NM_145838//NP_665837//XM_006497477//XP_006497540	5.68551	5.05553	4.67964	5.76503	5.8541	5.14868	5.47442	5.28618	4.91656	9.4936	9.64707	9.28201	5.1361	5.60704	6.20125	4.92568	5.49441	5.05155	7.99756	7.76641	7.95547	7.2892	6.89699	6.54909	0.579354	5.14022	5.58927	5.22572	9.47422	5.64813	7.90648	6.91176	0.160987
0.000253052	3.20015	3.20015	1.67814	0.0604557	1.38364	1	0	17435725	NM_031168 // Il6 // interleukin 6 // 5 B1|5 15.7 cM // 16193 /// ENSMUST00000026845 // Il6 // interleukin 6 // 5 B1|5 15.7 cM // 16193 /// AK152189 // Il6 // interleukin 6 // 5 B1|5 15.7 cM // 16193 /// J03783 // Il6 // interleukin 6 // 5 B1|5 15.7 cM // 16193 /// BC132458 // Il6 // interleukin 6 // 5 B1|5 15.7 cM // 16193 /// BC138766 // Il6 // interleukin 6 // 5 B1|5 15.7 cM // 16193 /// DQ7887…	NM_031168 // RefSeq // Mus musculus interleukin 6 (Il6), mRNA. // chr5 // 100 // 100 // 22 // 22 // 1 /// ENSMUST00000026845 // ENSEMBL // ensembl:known chromosome:GRCm38:5:30013161:30019968:1 gene:ENSMUSG00000025746 gene_biotype:protein_coding transcript_biotype:protein_coding // chr5 // 100 // 100 // 22 // 22 // 1 /// AK152189 // GenBank HTC // Mus musculus bone marrow macrophage cDNA, RIKEN fu…	Il6	interleukin 6	16193	3569	Mm.1019	NM_031168//NP_112445	2.18633	1.7338	2.27831	2.55153	2.27081	2.86818	2.02724	1.93163	2.33714	7.38602	5.49678	6.26633	2.24953	2.53415	2.60144	1.85438	2.40844	2.12549	6.04511	5.99883	5.12129	2.19708	2.23596	2.13001	-0.535375	2.06615	2.5635	2.09867	6.38305	2.46171	5.72175	2.18768	0.231326
0.0657799	1.48657	1	0	0.346028	0.928723	1	0	17494940	NM_020610 // Nrip3 // nuclear receptor interacting protein 3 // 7 E3-F1|7 // 78593 /// ENSMUST00000033331 // Nrip3 // nuclear receptor interacting protein 3 // 7 E3-F1|7 // 78593 /// ENSMUST00000041460 // Nrip3 // nuclear receptor interacting protein 3 // 7 E3-F1|7 // 78593 /// BC072641 // Nrip3 // nuclear receptor interacting protein 3 // 7 E3-F1|7 // 78593 /// AK020731 // Nrip3 // nuclear recep…	NM_020610 // RefSeq // Mus musculus nuclear receptor interacting protein 3 (Nrip3), mRNA. // chr7 // 85 // 85 // 17 // 20 // 1 /// ENSMUST00000033331 // ENSEMBL // ensembl_havana_transcript:known chromosome:GRCm38:7:109758059:109781545:-1 gene:ENSMUSG00000034825 gene_biotype:protein_coding transcript_biotype:protein_coding // chr7 // 85 // 85 // 17 // 20 // 1 /// ENSMUST00000041460 // ENSEMBL // …	Nrip3	nuclear receptor interacting protein 3	78593	56675	Mm.275374	NM_020610//NP_065635	2.38053	2.27798	2.81964	2.78621	2.2642	3.12475	2.365	2.10655	2.16859	6.07255	6.43759	6.13311	2.19539	2.39568	2.34731	2.55904	2.16847	2.54717	3.35771	2.96212	3.30735	2.8546	2.73631	2.43521	-0.144357	2.49272	2.72505	2.21338	6.21442	2.31279	3.20906	2.67537	0.0676262
0.0404174	2.07331	1	0	0.0605699	1.95303	1	0	17302490	NM_022886 // Scel // sciellin // 14|14 E // 64929 /// ENSMUST00000095576 // Scel // sciellin // 14|14 E // 64929 /// AF245700 // Scel // sciellin // 14|14 E // 64929 /// BC025142 // Scel // sciellin // 14|14 E // 64929 /// BC111874 // Scel // sciellin // 14|14 E // 64929 /// BC112380 // Scel // sciellin // 14|14 E // 64929	NM_022886 // RefSeq // Mus musculus sciellin (Scel), mRNA. // chr14 // 100 // 96 // 24 // 24 // 0 /// ENSMUST00000095576 // ENSEMBL // ensembl:known chromosome:GRCm38:14:103513341:103613346:1 gene:ENSMUSG00000022123 gene_biotype:protein_coding transcript_biotype:protein_coding // chr14 // 100 // 96 // 24 // 24 // 0 /// AF245700 // GenBank // Mus musculus sciellin precursor, (Scel) mRNA, complete …	Scel	sciellin	64929	8796	Mm.244003	NM_022886//NP_075024//XM_006519355//XM_006519356//XP_006519418//XP_006519419	2.74763	3.12608	3.42229	2.70601	3.20283	2.89038	3.29558	3.4467	3.45035	6.79896	7.33696	6.79447	3.5519	3.08847	3.21764	3.06047	3.27164	3.47319	5.24267	5.15055	5.27124	7.85595	8.61723	8.19198	0.0259114	3.09867	2.93307	3.39755	6.9768	3.286	5.22149	8.22172	0.0679444
0.000835688	2.51038	2.51038	1.32791	0.709779	1.12983	1	0	17214142	NM_009909 // Cxcr2 // chemokine (C-X-C motif) receptor 2 // 1 C3|1 38.41 cM // 12765 /// XM_006495638 // Cxcr2 // chemokine (C-X-C motif) receptor 2 // 1 C3|1 38.41 cM // 12765 /// ENSMUST00000027372 // Cxcr2 // chemokine (C-X-C motif) receptor 2 // 1 C3|1 38.41 cM // 12765 /// ENSMUST00000106899 // Cxcr2 // chemokine (C-X-C motif) receptor 2 // 1 C3|1 38.41 cM // 12765 /// BC051677 // Cxcr2 // c…	NM_009909 // RefSeq // Mus musculus chemokine (C-X-C motif) receptor 2 (Cxcr2), mRNA. // chr1 // 100 // 100 // 17 // 17 // 0 /// XM_006495638 // RefSeq // PREDICTED: Mus musculus chemokine (C-X-C motif) receptor 2 (Cxcr2), transcript variant X1, mRNA. // chr1 // 100 // 59 // 10 // 10 // 0 /// ENSMUST00000027372 // ENSEMBL // ensembl:known chromosome:GRCm38:1:74153989:74160610:1 gene:ENSMUSG000000…	Cxcr2	chemokine (C-X-C motif) receptor 2	12765	3579	Mm.234466	NM_009909//NP_034039//XM_006495638//XP_006495701	2.99548	3.41899	3.84448	3.66965	4.02632	4.01041	2.90349	3.41546	3.20704	7.46856	7.45189	7.28641	3.37044	3.69272	3.32503	2.67858	4.21853	4.0574	4.9983	5.40939	4.10845	3.2872	4.06566	3.55695	-0.241427	3.41965	3.90212	3.17533	7.40229	3.46273	4.83871	3.6366	0.0674821
0.298166	1.31838	1	0	0.324592	1.34381	1	0	17514541	NM_019471 // Mmp10 // matrix metallopeptidase 10 // 9 A1|9 // 17384 /// ENSMUST00000034488 // Mmp10 // matrix metallopeptidase 10 // 9 A1|9 // 17384 /// BC130027 // Mmp10 // matrix metallopeptidase 10 // 9 A1|9 // 17384 /// Y13185 // Mmp10 // matrix metallopeptidase 10 // 9 A1|9 // 17384	NM_019471 // RefSeq // Mus musculus matrix metallopeptidase 10 (Mmp10), mRNA. // chr9 // 100 // 100 // 20 // 20 // 1 /// ENSMUST00000034488 // ENSEMBL // ensembl:known chromosome:GRCm38:9:7502352:7510238:1 gene:ENSMUSG00000047562 gene_biotype:protein_coding transcript_biotype:protein_coding // chr9 // 100 // 100 // 20 // 20 // 1 /// BC130027 // GenBank // Mus musculus matrix metallopeptidase 10, …	Mmp10	matrix metallopeptidase 10	17384	4319	Mm.14126	NM_019471//NP_062344	3.3801	3.77128	4.20707	3.85985	5.90218	5.27272	4.25298	4.49877	4.51815	9.45113	9.26116	9.44439	7.36756	8.3508	7.94835	3.81026	6.13576	7.79348	9.73337	9.51372	9.12557	3.25478	3.64108	4.11286	-0.395794	3.78615	5.01158	4.4233	9.38556	7.8889	9.45756	3.66957	0.308575
			#NUM!				#NUM!	17427133	XR_401751 // LOC102637941 // uncharacterized LOC102637941 // --- // 102637941 /// ENSMUST00000154352 // Gm12602 // predicted gene 12602 // --- // --- /// AK144841 // LOC102637941 // uncharacterized LOC102637941 // --- // 102637941 /// XR_401753 // LOC102637941 // uncharacterized LOC102637941 // --- // 102637941	XR_401751 // RefSeq // PREDICTED: Mus musculus uncharacterized LOC102637941 (LOC102637941), transcript variant X1, ncRNA. // chr4 // 100 // 100 // 21 // 21 // 1 /// ENSMUST00000154352 // ENSEMBL // havana:known chromosome:GRCm38:4:89100664:89128226:-1 gene:ENSMUSG00000085569 gene_biotype:processed_transcript transcript_biotype:processed_transcript // chr4 // 76 // 76 // 16 // 21 // 1 /// AK144841…	LOC102637941	uncharacterized LOC102637941	102637941	#N/A	Mm.366358	XR_390704//XR_390705//XR_390706//XR_401751//XR_401752//XR_401753	2.6734	2.05656	2.23545	2.11988	2.25949	2.11653	1.67159	1.99232	1.81599	5.30533	5.93314	4.91309	2.15588	2.53831	2.55961	1.84985	1.8412	2.07303	4.20442	4.21594	5.0114	3.15099	2.20068	2.67486	0.474826	2.3218	2.1653	1.82663	5.38385	2.41793	4.47725	2.67551	0.0899079
6.48777e-09	9.34826	9.34826	3.2247	0.919265	1.05386	1	0	17261608	NM_146017 // Gabrp // gamma-aminobutyric acid (GABA) A receptor, pi // 11 A4|11 // 216643 /// ENSMUST00000020366 // Gabrp // gamma-aminobutyric acid (GABA) A receptor, pi // 11 A4|11 // 216643 /// BC023693 // Gabrp // gamma-aminobutyric acid (GABA) A receptor, pi // 11 A4|11 // 216643 /// BC025550 // Gabrp // gamma-aminobutyric acid (GABA) A receptor, pi // 11 A4|11 // 216643 /// BC027245 // Gabr…	NM_146017 // RefSeq // Mus musculus gamma-aminobutyric acid (GABA) A receptor, pi (Gabrp), mRNA. // chr11 // 100 // 95 // 20 // 20 // 0 /// ENSMUST00000020366 // ENSEMBL // ensembl_havana_transcript:known chromosome:GRCm38:11:33550781:33578957:-1 gene:ENSMUSG00000020159 gene_biotype:protein_coding transcript_biotype:protein_coding // chr11 // 100 // 95 // 20 // 20 // 0 /// BC023693 // GenBank // …	Gabrp	gamma-aminobutyric acid (GABA) A receptor, pi	216643	2568	Mm.99989	NM_146017//NP_666129//XM_006514666//XP_006514729	5.51725	5.04553	5.34529	5.44791	5.38486	5.49304	4.66932	4.78065	5.04807	9.27264	7.75328	8.98552	3.99955	3.86676	4.36351	4.27196	4.94147	3.77075	5.97011	6.53588	6.91277	4.2151	4.51101	4.78077	-0.376873	5.30269	5.44194	4.83268	8.67048	4.07661	6.47292	4.50229	0.163106
0.324711	1.18748	1	0	0.329807	1.41119	1	0	17491941	NM_053080 // Aldh1a3 // aldehyde dehydrogenase family 1, subfamily A3 // 7 C|7 // 56847 /// ENSMUST00000015278 // Aldh1a3 // aldehyde dehydrogenase family 1, subfamily A3 // 7 C|7 // 56847 /// BC058277 // Aldh1a3 // aldehyde dehydrogenase family 1, subfamily A3 // 7 C|7 // 56847 /// AF152359 // Aldh1a3 // aldehyde dehydrogenase family 1, subfamily A3 // 7 C|7 // 56847 /// AF246711 // Aldh1a3 // a…	NM_053080 // RefSeq // Mus musculus aldehyde dehydrogenase family 1, subfamily A3 (Aldh1a3), mRNA. // chr7 // 82 // 82 // 23 // 28 // 1 /// ENSMUST00000015278 // ENSEMBL // ensembl_havana_transcript:known chromosome:GRCm38:7:66390892:66427517:-1 gene:ENSMUSG00000015134 gene_biotype:protein_coding transcript_biotype:protein_coding // chr7 // 86 // 86 // 24 // 28 // 1 /// BC058277 // GenBank // Mus…	Aldh1a3	aldehyde dehydrogenase family 1, subfamily A3	56847	220	Mm.140988	NM_053080//NP_444310	4.52715	4.74115	5.53633	5.27086	5.04127	5.37194	5.52394	5.61571	5.4512	9.56058	9.23834	9.75868	5.63031	6.05504	5.52139	5.11975	6.00714	5.63675	6.46449	6.75145	6.16998	5.07962	5.27795	5.82691	-0.416249	4.93488	5.22803	5.53028	9.5192	5.73558	6.46197	5.39483	0.0933481
0.0551891	1.83965	1	0	0.200067	0.800043	1	0	17224551	NM_008985 // Ptprn // protein tyrosine phosphatase, receptor type, N // 1 C3|1 38.64 cM // 19275 /// ENSMUST00000027404 // Ptprn // protein tyrosine phosphatase, receptor type, N // 1 C3|1 38.64 cM // 19275 /// BC064020 // Ptprn // protein tyrosine phosphatase, receptor type, N // 1 C3|1 38.64 cM // 19275 /// DQ832283 // Ptprn // protein tyrosine phosphatase, receptor type, N // 1 C3|1 38.64 cM /…	NM_008985 // RefSeq // Mus musculus protein tyrosine phosphatase, receptor type, N (Ptprn), mRNA. // chr1 // 100 // 100 // 17 // 17 // 0 /// ENSMUST00000027404 // ENSEMBL // ensembl_havana_transcript:known chromosome:GRCm38:1:75247027:75264213:-1 gene:ENSMUSG00000026204 gene_biotype:protein_coding transcript_biotype:protein_coding // chr1 // 100 // 100 // 17 // 17 // 0 /// BC064020 // GenBank // …	Ptprn	protein tyrosine phosphatase, receptor type, N	19275	5798	Mm.2902	NM_008985//NP_033011//XM_006496444//XM_006496445//XP_006496507//XP_006496508	2.81386	3.65919	3.76731	2.24452	3.1486	2.9373	3.09673	3.27933	3.51547	6.39151	6.89291	5.76053	2.65843	3.10648	2.92528	3.60435	3.33661	2.82666	3.24873	2.97826	3.47749	3.20452	3.33734	4.37083	-0.107745	3.41346	2.77681	3.29718	6.34832	2.89673	3.23483	3.63756	0.182612
1.15853e-09	5.4584	5.4584	2.44848	0.0234432	2.172	1	0	17218060	NM_011198 // Ptgs2 // prostaglandin-endoperoxide synthase 2 // 1 H1|1 63.84 cM // 19225 /// ENSMUST00000035065 // Ptgs2 // prostaglandin-endoperoxide synthase 2 // 1 H1|1 63.84 cM // 19225 /// BC052900 // Ptgs2 // prostaglandin-endoperoxide synthase 2 // 1 H1|1 63.84 cM // 19225 /// M64291 // Ptgs2 // prostaglandin-endoperoxide synthase 2 // 1 H1|1 63.84 cM // 19225 /// M88242 // Ptgs2 // prostag…	NM_011198 // RefSeq // Mus musculus prostaglandin-endoperoxide synthase 2 (Ptgs2), mRNA. // chr1 // 100 // 100 // 28 // 28 // 0 /// ENSMUST00000035065 // ENSEMBL // ensembl_havana_transcript:known chromosome:GRCm38:1:150100031:150108227:1 gene:ENSMUSG00000032487 gene_biotype:protein_coding transcript_biotype:protein_coding // chr1 // 100 // 100 // 28 // 28 // 0 /// BC052900 // GenBank // Mus musc…	Ptgs2	prostaglandin-endoperoxide synthase 2	19225	5743	Mm.292547	NM_011198//NP_035328	6.42527	6.11445	6.13993	6.80409	7.95423	5.71835	5.13164	5.29434	5.88119	10.0923	9.24306	9.72891	5.84878	7.48669	6.41835	6.34587	6.62592	6.06505	9.80186	9.91991	8.90241	5.50515	5.12723	4.01543	0.430447	6.22655	6.82556	5.43572	9.6881	6.58461	9.54139	4.8826	0.46167
0.083816	1.06834	1	0	0.0724322	0.731655	1	0	17221122	NM_001290390 // Sntg1 // syntrophin, gamma 1 // 1 A1-A2|1 // 71096 /// NM_001290392 // Sntg1 // syntrophin, gamma 1 // 1 A1-A2|1 // 71096 /// NM_001290393 // Sntg1 // syntrophin, gamma 1 // 1 A1-A2|1 // 71096 /// NM_027671 // Sntg1 // syntrophin, gamma 1 // 1 A1-A2|1 // 71096 /// ENSMUST00000115488 // Sntg1 // syntrophin, gamma 1 // 1 A1-A2|1 // 71096 /// ENSMUST00000132064 // Sntg1 // syntrophin…	NM_001290390 // RefSeq // Mus musculus syntrophin, gamma 1 (Sntg1), transcript variant 2, mRNA. // chr1 // 100 // 95 // 19 // 19 // 0 /// NM_001290392 // RefSeq // Mus musculus syntrophin, gamma 1 (Sntg1), transcript variant 3, mRNA. // chr1 // 100 // 85 // 17 // 17 // 0 /// NM_001290393 // RefSeq // Mus musculus syntrophin, gamma 1 (Sntg1), transcript variant 4, mRNA. // chr1 // 100 // 95 // 19 …	Sntg1	syntrophin, gamma 1	71096	54212	Mm.336395//Mm.388998	NM_001290390//NM_001290392//NM_001290393//NM_027671//NP_001277319//NP_001277321//NP_001277322//NP_081947//XM_006495568//XM_006495569//XM_006495570//XM_006495571//XM_006495572//XM_006495573//XM_006495574//XM_006495575//XP_006495631//XP_006495632//XP_006495633//XP_006495634//XP_006495635//XP_006495636//XP_006495637//XP_006495638	2.73056	2.37667	2.27697	2.02359	2.28298	3.07129	2.7534	2.1552	2.53004	6.19096	5.57742	6.55575	3.09185	2.66938	3.22183	2.45355	3.15959	3.23751	3.68263	3.98833	3.25525	2.79065	2.34853	2.49295	-0.436732	2.4614	2.45929	2.47955	6.10804	2.99435	3.64207	2.54404	0.154759
0.0563758	0.651101	1	0	0.532412	0.922538	1	0	17522555	NM_008522 // Ltf // lactotransferrin // 9 F|9 60.79 cM // 17002 /// ENSMUST00000035077 // Ltf // lactotransferrin // 9 F|9 60.79 cM // 17002 /// BC006904 // Ltf // lactotransferrin // 9 F|9 60.79 cM // 17002 /// CT010339 // Ltf // lactotransferrin // 9 F|9 60.79 cM // 17002 /// D88510 // Ltf // lactotransferrin // 9 F|9 60.79 cM // 17002 /// FJ538998 // Ltf // lactotransferrin // 9 F|9 60.79 cM /…	NM_008522 // RefSeq // Mus musculus lactotransferrin (Ltf), mRNA. // chr9 // 100 // 100 // 29 // 29 // 1 /// ENSMUST00000035077 // ENSEMBL // ensembl:known chromosome:GRCm38:9:111019292:111042766:1 gene:ENSMUSG00000032496 gene_biotype:protein_coding transcript_biotype:protein_coding // chr9 // 100 // 100 // 29 // 29 // 1 /// BC006904 // GenBank // Mus musculus lactotransferrin, mRNA (cDNA clone M…	Ltf	lactotransferrin	17002	4057	Mm.282359	NM_008522//NP_032548	3.47773	3.95627	3.55324	5.93782	5.59062	5.50269	3.55452	3.91877	4.15353	9.78378	8.60718	10.0385	4.87148	5.70163	4.97302	4.17992	6.48736	4.9822	7.6206	7.58737	8.0669	4.52028	4.9368	5.71395	-0.439811	3.66241	5.67704	3.8756	9.47647	5.18205	7.75829	5.05701	0.199649
			#NUM!				#NUM!	17497724	NM_001033632 // Ifitm6 // interferon induced transmembrane protein 6 // 7 F5|7 // 213002 /// ENSMUST00000081924 // Ifitm6 // interferon induced transmembrane protein 6 // 7 F5|7 // 213002 /// BC104338 // Ifitm6 // interferon induced transmembrane protein 6 // 7 F5|7 // 213002 /// BC104339 // Ifitm6 // interferon induced transmembrane protein 6 // 7 F5|7 // 213002	NM_001033632 // RefSeq // Mus musculus interferon induced transmembrane protein 6 (Ifitm6), mRNA. // chr7 // 100 // 100 // 19 // 19 // 1 /// ENSMUST00000081924 // ENSEMBL // ensembl:known chromosome:GRCm38:7:141015812:141016892:-1 gene:ENSMUSG00000059108 gene_biotype:protein_coding transcript_biotype:protein_coding // chr7 // 100 // 100 // 19 // 19 // 1 /// BC104338 // GenBank // Mus musculus int…	Ifitm6	interferon induced transmembrane protein 6	213002	#N/A	Mm.276440	NM_001033632//NP_001028804	2.39798	2.38149	3.17861	2.2574	2.6983	3.30589	2.06757	2.61607	2.34164	6.11815	4.73164	7.235	2.73774	2.60323	2.42046	2.51697	2.93972	2.69585	4.90518	4.91572	3.89486	2.30567	2.62056	2.08982	-1.05168	2.65269	2.75386	2.34176	6.02827	2.58714	4.57192	2.33868	0.431596
0.0787378	1.4648	1	0				#NUM!	17410435	NM_001029836 // Npnt // nephronectin // 3 G3|3 // 114249 /// NM_001287101 // Npnt // nephronectin // 3 G3|3 // 114249 /// NM_001287102 // Npnt // nephronectin // 3 G3|3 // 114249 /// NM_001287103 // Npnt // nephronectin // 3 G3|3 // 114249 /// NM_033525 // Npnt // nephronectin // 3 G3|3 // 114249 /// ENSMUST00000042729 // Npnt // nephronectin // 3 G3|3 // 114249 /// ENSMUST00000042744 // Npnt // …	NM_001029836 // RefSeq // Mus musculus nephronectin (Npnt), transcript variant 2, mRNA. // chr3 // 85 // 85 // 22 // 26 // 1 /// NM_001287101 // RefSeq // Mus musculus nephronectin (Npnt), transcript variant 3, mRNA. // chr3 // 100 // 100 // 26 // 26 // 1 /// NM_001287102 // RefSeq // Mus musculus nephronectin (Npnt), transcript variant 4, mRNA. // chr3 // 92 // 92 // 24 // 26 // 1 /// NM_0012871…	Npnt	nephronectin	114249	255743	Mm.279310//Mm.440226	NM_001029836//NM_001287101//NM_001287102//NM_001287103//NM_033525//NP_001025007//NP_001274030//NP_001274031//NP_001274032//NP_277060//XM_006500915//XP_006500978	4.66585	4.84049	5.42186	4.9691	4.90088	4.77369	4.02571	3.92968	4.15859	7.07194	8.07831	7.42762	5.28251	6.23274	5.28421	5.08502	4.62101	5.09459	7.00176	6.73653	6.28037	6.22892	6.86318	6.4929	0.174835	4.97607	4.88122	4.03799	7.52595	5.59982	6.67289	6.52833	0.148123
			#NUM!				#NUM!	17415375	NR_033533 // Gm12603 // predicted gene 12603 // 4 C4|4 // 100040617 /// ENSMUST00000146678 // Gm12603 // predicted gene 12603 // 4 C4|4 // 100040617 /// ENSMUST00000129601 // Gm12603 // predicted gene 12603 // 4 C4|4 // 100040617	NR_033533 // RefSeq // Mus musculus predicted gene 12603 (Gm12603), long non-coding RNA. // chr4 // 85 // 85 // 17 // 20 // 1 /// ENSMUST00000146678 // ENSEMBL // havana:known chromosome:GRCm38:4:89050308:89084511:1 gene:ENSMUSG00000085183 gene_biotype:lincRNA transcript_biotype:lincRNA // chr4 // 85 // 85 // 17 // 20 // 1 /// ENSMUST00000129601 // ENSEMBL // havana:known chromosome:GRCm38:4:8905…	Gm12603	predicted gene 12603	100040617	#N/A	Mm.171720	NR_033533	2.28666	2.19196	2.3196	2.37031	3.28886	2.40452	2.11705	2.57211	2.16213	6.20969	7.0018	5.63104	2.21559	1.88125	2.18668	1.61783	2.19056	2.22358	2.61761	2.13079	2.25862	1.928	2.43649	2.26958	0.512456	2.26607	2.6879	2.28376	6.28084	2.0945	2.33567	2.21136	0.169254
3.43585e-09	6.25196	6.25196	2.64431	0.0294525	2.05972	1	0	17218861	NM_007976 // F5 // coagulation factor V // 1 H2.2|1 71.46 cM // 14067 /// ENSMUST00000086040 // F5 // coagulation factor V // 1 H2.2|1 71.46 cM // 14067 /// U52925 // F5 // coagulation factor V // 1 H2.2|1 71.46 cM // 14067	NM_007976 // RefSeq // Mus musculus coagulation factor V (F5), mRNA. // chr1 // 100 // 100 // 23 // 23 // 0 /// ENSMUST00000086040 // ENSEMBL // ensembl_havana_transcript:known chromosome:GRCm38:1:164151838:164220277:1 gene:ENSMUSG00000026579 gene_biotype:protein_coding transcript_biotype:protein_coding // chr1 // 100 // 100 // 23 // 23 // 0 /// U52925 // GenBank // Mus musculus coagulation facto…	F5	coagulation factor V	14067	2153	Mm.12900	NM_007976//NP_032002	3.79866	4.16202	4.81242	5.06162	5.10489	4.66484	3.97048	4.07566	3.90877	7.98551	8.28549	8.45108	4.89605	5.95097	5.79352	4.73285	5.29277	5.16704	9.05296	9.07535	8.68739	5.59328	5.85174	6.32039	-0.0676473	4.2577	4.94378	3.98497	8.24069	5.54685	8.93857	5.92181	0.141856
0.36961	0.675137	1	0				#NUM!	17516087	NM_020518 // Vsig2 // V-set and immunoglobulin domain containing 2 // 9|9 B // 57276 /// ENSMUST00000002008 // Vsig2 // V-set and immunoglobulin domain containing 2 // 9|9 B // 57276 /// BC099457 // Vsig2 // V-set and immunoglobulin domain containing 2 // 9|9 B // 57276	NM_020518 // RefSeq // Mus musculus V-set and immunoglobulin domain containing 2 (Vsig2), mRNA. // chr9 // 100 // 100 // 23 // 23 // 1 /// ENSMUST00000002008 // ENSEMBL // ensembl:known chromosome:GRCm38:9:37539255:37544205:1 gene:ENSMUSG00000001943 gene_biotype:protein_coding transcript_biotype:protein_coding // chr9 // 100 // 100 // 23 // 23 // 1 /// BC099457 // GenBank // Mus musculus V-set an…	Vsig2	V-set and immunoglobulin domain containing 2	57276	23584	Mm.27478	NM_020518//NP_065264//XM_006510506//XP_006510569	8.7577	5.73077	8.82967	8.9979	9.11607	8.9988	4.47443	5.35889	5.38225	10.0618	9.62485	10.0178	5.46086	4.69316	4.91919	8.25267	8.75231	5.40824	8.80752	8.58702	8.97323	10.2464	10.2894	10.1585	0.373575	7.77271	9.03759	5.07186	9.90148	5.0244	8.78926	10.2314	0.722881
			#NUM!				#NUM!	17399374	NM_013605 // Muc1 // mucin 1, transmembrane // 3 F1|3 39.02 cM // 17829 /// ENSMUST00000041142 // Muc1 // mucin 1, transmembrane // 3 F1|3 39.02 cM // 17829 /// BC005441 // Muc1 // mucin 1, transmembrane // 3 F1|3 39.02 cM // 17829 /// M84683 // Muc1 // mucin 1, transmembrane // 3 F1|3 39.02 cM // 17829 /// ENSMUST00000139206 // Muc1 // mucin 1, transmembrane // 3 F1|3 39.02 cM // 17829 /// ENSMU…	NM_013605 // RefSeq // Mus musculus mucin 1, transmembrane (Muc1), mRNA. // chr3 // 87 // 87 // 26 // 30 // 1 /// ENSMUST00000041142 // ENSEMBL // ensembl_havana_transcript:known chromosome:GRCm38:3:89229057:89233381:1 gene:ENSMUSG00000042784 gene_biotype:protein_coding transcript_biotype:protein_coding // chr3 // 87 // 87 // 26 // 30 // 1 /// BC005441 // GenBank // Mus musculus mucin 1, transmem…	Muc1	mucin 1, transmembrane	17829	#N/A	Mm.16193	NM_013605//NP_038633	5.27317	6.73692	5.0361	4.35825	5.48605	5.34442	5.1958	7.43913	6.26586	9.66151	9.00943	9.03096	5.13993	4.88552	5.15804	5.66817	5.55643	4.7786	7.59536	7.45783	6.67588	10.3348	10.2435	10.2856	-0.457469	5.68207	5.06291	6.30026	9.23397	5.06116	7.24302	10.288	0.529092
0.264152	0.852027	1	0	0.277596	0.893865	1	0	17540059	NM_016913 // Porcn // porcupine homolog (Drosophila) // X A1.1|X 3.7 cM // 53627 /// NM_023638 // Porcn // porcupine homolog (Drosophila) // X A1.1|X 3.7 cM // 53627 /// NM_145907 // Porcn // porcupine homolog (Drosophila) // X A1.1|X 3.7 cM // 53627 /// NM_145908 // Porcn // porcupine homolog (Drosophila) // X A1.1|X 3.7 cM // 53627 /// ENSMUST00000077595 // Porcn // porcupine homolog (Drosophil…	NM_016913 // RefSeq // Mus musculus porcupine homolog (Drosophila) (Porcn), transcript variant Mporc-a, mRNA. // chrX // 100 // 100 // 25 // 25 // 1 /// NM_023638 // RefSeq // Mus musculus porcupine homolog (Drosophila) (Porcn), transcript variant Mporc-d, mRNA. // chrX // 100 // 100 // 25 // 25 // 1 /// NM_145907 // RefSeq // Mus musculus porcupine homolog (Drosophila) (Porcn), transcript varian…	Porcn	porcupine homolog (Drosophila)	53627	64840	Mm.443425	NM_016913//NM_023638//NM_145907//NM_145908//NP_058609//NP_076127//NP_665914//NP_665915//XM_006527644//XM_006527645//XM_006527646//XM_006527647//XP_006527707//XP_006527708//XP_006527709//XP_006527710	4.76762	4.97209	4.78717	4.66543	4.23721	3.5431	4.46772	4.32813	4.30021	7.36544	6.96575	7.33869	5.15558	5.01641	4.75831	4.67736	4.55145	5.08983	5.67803	5.61643	5.22789	6.30597	6.56918	6.01964	0.136631	4.8423	4.14858	4.36535	7.22329	4.97677	5.50745	6.29826	0.0864287
4.1693e-08	0.423779	0.423779	-1.23862	0.00133626	0.442925	0.442925	-1.17487	17544385	NM_019656 // Tspan6 // tetraspanin 6 // X E3|X // 56496 /// ENSMUST00000087557 // Tspan6 // tetraspanin 6 // X E3|X // 56496 /// AF053454 // Tspan6 // tetraspanin 6 // X E3|X // 56496 /// BC003733 // Tspan6 // tetraspanin 6 // X E3|X // 56496 /// BC110314 // Tspan6 // tetraspanin 6 // X E3|X // 56496 /// ENSMUST00000176641 // Tspan6 // tetraspanin 6 // X E3|X // 56496 /// ENSMUST00000176718 // Ts…	NM_019656 // RefSeq // Mus musculus tetraspanin 6 (Tspan6), mRNA. // chrX // 100 // 100 // 25 // 25 // 1 /// ENSMUST00000087557 // ENSEMBL // ensembl_havana_transcript:known chromosome:GRCm38:X:133891068:133898429:-1 gene:ENSMUSG00000067377 gene_biotype:protein_coding transcript_biotype:protein_coding // chrX // 100 // 100 // 25 // 25 // 1 /// AF053454 // GenBank // Mus musculus tetraspan TM4SF (…	Tspan6	tetraspanin 6	56496	7105	Mm.46701	NM_019656//NP_062630	5.63678	6.68206	6.0437	6.23704	6.67845	6.19887	5.72932	5.67105	6.17265	9.70853	9.59469	9.63427	6.1965	6.34141	6.44077	6.52378	7.00204	6.23156	8.07809	7.90793	8.05905	6.75361	7.13693	6.98669	-0.181313	6.12085	6.37146	5.85767	9.64583	6.32623	8.01503	6.95907	0.0884706
0.00212554	2.06631	2.06631	1.04706	0.757482	1.11177	1	0	17407363	NM_001281852 // S100a9 // S100 calcium binding protein A9 (calgranulin B) // 3 F1-F2|3 39.91 cM // 20202 /// NM_009114 // S100a9 // S100 calcium binding protein A9 (calgranulin B) // 3 F1-F2|3 39.91 cM // 20202 /// ENSMUST00000117167 // S100a9 // S100 calcium binding protein A9 (calgranulin B) // 3 F1-F2|3 39.91 cM // 20202 /// ENSMUST00000069960 // S100a9 // S100 calcium binding protein A9 (calg…	NM_001281852 // RefSeq // Mus musculus S100 calcium binding protein A9 (calgranulin B) (S100a9), transcript variant 1, mRNA. // chr3 // 100 // 100 // 18 // 18 // 1 /// NM_009114 // RefSeq // Mus musculus S100 calcium binding protein A9 (calgranulin B) (S100a9), transcript variant 2, mRNA. // chr3 // 100 // 100 // 18 // 18 // 1 /// ENSMUST00000117167 // ENSEMBL // ensembl_havana_transcript:known c…	S100a9	S100 calcium binding protein A9 (calgranulin B)	20202	6280	Mm.2128	NM_001281852//NM_009114//NP_001268781//NP_033140	2.49135	2.19944	2.11998	2.26753	2.40721	3.40941	2.13155	2.48684	1.91696	6.15396	5.32438	6.92451	3.73253	3.394	3.06248	2.03612	3.79514	3.55622	5.16584	4.56836	3.91554	2.62438	2.9778	2.41908	-0.651753	2.27026	2.69472	2.17845	6.13428	3.39634	4.54991	2.67375	0.252337
0.00692172	1.57637	1.57637	0.656608				#NUM!	17529099	NM_001290308 // Col12a1 // collagen, type XII, alpha 1 // 9 E1|9 43.82 cM // 12816 /// XM_006510797 // Col12a1 // collagen, type XII, alpha 1 // 9 E1|9 43.82 cM // 12816 /// ENSMUST00000071750 // Col12a1 // collagen, type XII, alpha 1 // 9 E1|9 43.82 cM // 12816 /// ENSMUST00000121227 // Col12a1 // collagen, type XII, alpha 1 // 9 E1|9 43.82 cM // 12816 /// U25652 // Col12a1 // collagen, type XII…	NM_001290308 // RefSeq // Mus musculus collagen, type XII, alpha 1 (Col12a1), mRNA. // chr9 // 98 // 98 // 53 // 54 // 1 /// XM_006510797 // RefSeq // PREDICTED: Mus musculus collagen, type XII, alpha 1 (Col12a1), transcript variant X1, mRNA. // chr9 // 96 // 96 // 52 // 54 // 1 /// ENSMUST00000071750 // ENSEMBL // ensembl_havana_transcript:known chromosome:GRCm38:9:79598991:79718518:-1 gene:ENSM…	Col12a1	collagen, type XII, alpha 1	12816	1303	Mm.3819	NM_001290308//NM_007730//NP_001277237//NP_031756//XM_006510797//XM_006510798//XM_006510799//XM_006510800//XP_006510860//XP_006510861//XP_006510862//XP_006510863	5.5929	5.50154	6.13643	5.37744	5.73917	4.71738	5.27321	5.76666	5.53943	8.15465	8.81865	8.80135	6.42884	7.45597	6.33451	5.49959	5.70648	6.40162	8.89118	8.52086	8.05645	5.80135	6.09025	5.65516	0.318496	5.74362	5.278	5.52643	8.59155	6.73977	8.48949	5.84892	0.19548
0.00218581	0.378136	0.378136	-1.40302				#NUM!	17301414	NM_028903 // Scara5 // scavenger receptor class A, member 5 (putative) // 14 D1|14 // 71145 /// ENSMUST00000022610 // Scara5 // scavenger receptor class A, member 5 (putative) // 14 D1|14 // 71145 /// ENSMUST00000154373 // Scara5 // scavenger receptor class A, member 5 (putative) // 14 D1|14 // 71145 /// AK016543 // Scara5 // scavenger receptor class A, member 5 (putative) // 14 D1|14 // 71145 //…	NM_028903 // RefSeq // Mus musculus scavenger receptor class A, member 5 (putative) (Scara5), transcript variant 1, mRNA. // chr14 // 100 // 76 // 13 // 13 // 0 /// ENSMUST00000022610 // ENSEMBL // ensembl_havana_transcript:known chromosome:GRCm38:14:65666403:65764826:1 gene:ENSMUSG00000022032 gene_biotype:protein_coding transcript_biotype:protein_coding // chr14 // 100 // 76 // 13 // 13 // 0 ///…	Scara5	scavenger receptor class A, member 5 (putative)	71145	286133	Mm.83840	NM_001168318//NM_028903//NP_001161790//NP_083179	3.87389	4.17351	4.19059	4.05431	4.02557	4.37677	4.00027	3.39922	3.84384	7.39353	6.65583	7.99209	4.55703	4.31155	3.87095	4.70335	4.80831	4.44341	5.56617	5.47043	4.75475	4.89252	4.42327	4.65751	-0.560661	4.07933	4.15222	3.74778	7.34715	4.24651	5.26378	4.65777	0.14717
			#NUM!				#NUM!	17438975	NM_203320 // Cxcl3 // chemokine (C-X-C motif) ligand 3 // 5 E1|5 // 330122 /// ENSMUST00000031326 // Cxcl3 // chemokine (C-X-C motif) ligand 3 // 5 E1|5 // 330122 /// AY311403 // Cxcl3 // chemokine (C-X-C motif) ligand 3 // 5 E1|5 // 330122	NM_203320 // RefSeq // Mus musculus chemokine (C-X-C motif) ligand 3 (Cxcl3), mRNA. // chr5 // 100 // 100 // 8 // 8 // 1 /// ENSMUST00000031326 // ENSEMBL // ensembl:known chromosome:GRCm38:5:90786103:90788086:1 gene:ENSMUSG00000029379 gene_biotype:protein_coding transcript_biotype:protein_coding // chr5 // 100 // 100 // 8 // 8 // 1 /// AY311403 // GenBank // Mus musculus dendritic cell inflammat…	Cxcl3	chemokine (C-X-C motif) ligand 3	330122	#N/A	Mm.244289	NM_203320//NP_976065	1.91831	2.84443	1.75578	1.59958	3.18021	4.11449	1.97659	3.07959	2.04018	6.24991	6.36797	7.33827	3.51892	3.85826	4.15518	2.071	3.73151	3.90628	5.53678	5.73899	4.24529	2.17172	2.36216	1.28604	-0.844167	2.17284	2.96476	2.36545	6.65205	3.84412	5.17369	1.93998	0.560479
			#NUM!				#NUM!	17307025	NM_010371 // Gzmc // granzyme C // 14 C3|14 28.19 cM // 14940 /// ENSMUST00000015585 // Gzmc // granzyme C // 14 C3|14 28.19 cM // 14940 /// BC120755 // Gzmc // granzyme C // 14 C3|14 28.19 cM // 14940 /// BC120757 // Gzmc // granzyme C // 14 C3|14 28.19 cM // 14940 /// BC145030 // Gzmc // granzyme C // 14 C3|14 28.19 cM // 14940 /// M18459 // Gzmc // granzyme C // 14 C3|14 28.19 cM // 14940	NM_010371 // RefSeq // Mus musculus granzyme C (Gzmc), mRNA. // chr14 // 100 // 100 // 20 // 20 // 0 /// ENSMUST00000015585 // ENSEMBL // ensembl:known chromosome:GRCm38:14:56231401:56234656:-1 gene:ENSMUSG00000079186 gene_biotype:protein_coding transcript_biotype:protein_coding // chr14 // 100 // 100 // 20 // 20 // 0 /// BC120755 // GenBank // Mus musculus granzyme C, mRNA (cDNA clone MGC:155992…	Gzmc	granzyme C	14940	#N/A	Mm.14465	NM_010371//NP_034501//XM_006518568//XP_006518631	2.58528	2.53409	2.99175	2.4288	2.1964	2.38792	2.28323	2.21015	2.05137	5.45348	5.01747	5.41835	3.32513	3.04627	3.22315	2.35108	2.38425	3.17266	2.11886	2.13538	2.27038	2.62874	2.28724	2.55967	-0.223802	2.70371	2.3377	2.18158	5.29643	3.19818	2.17488	2.49188	0.0341816
0.000601913	2.06813	2.06813	1.04833	0.290173	1.29593	1	0	17364176	NM_013468 // Ankrd1 // ankyrin repeat domain 1 (cardiac muscle) // 19|19 C3 // 107765 /// ENSMUST00000025718 // Ankrd1 // ankyrin repeat domain 1 (cardiac muscle) // 19|19 C3 // 107765 /// BC037138 // Ankrd1 // ankyrin repeat domain 1 (cardiac muscle) // 19|19 C3 // 107765 /// AF041847 // Ankrd1 // ankyrin repeat domain 1 (cardiac muscle) // 19|19 C3 // 107765	NM_013468 // RefSeq // Mus musculus ankyrin repeat domain 1 (cardiac muscle) (Ankrd1), mRNA. // chr19 // 100 // 100 // 21 // 21 // 1 /// ENSMUST00000025718 // ENSEMBL // ensembl:known chromosome:GRCm38:19:36111965:36119844:-1 gene:ENSMUSG00000024803 gene_biotype:protein_coding transcript_biotype:protein_coding // chr19 // 100 // 100 // 21 // 21 // 1 /// BC037138 // GenBank // Mus musculus ankyrin…	Ankrd1	ankyrin repeat domain 1 (cardiac muscle)	107765	27063	Mm.10279	NM_013468//NP_038496	4.79136	3.41277	4.09882	3.51742	3.03089	4.56597	4.02123	3.73209	4.24439	6.28005	7.5547	7.23642	5.55324	7.50213	5.46171	3.62992	4.62104	5.649	8.32521	8.17617	7.91772	2.97811	3.93241	3.84851	0.180073	4.10098	3.70476	3.99924	7.02372	6.17236	8.1397	3.58634	0.584996
0.137426	1.60539	1	0	0.351981	1.26525	1	0	17485924	NM_001290423 // Il11 // interleukin 11 // 7 A1|7 2.76 cM // 16156 /// NM_008350 // Il11 // interleukin 11 // 7 A1|7 2.76 cM // 16156 /// ENSMUST00000163481 // Il11 // interleukin 11 // 7 A1|7 2.76 cM // 16156 /// ENSMUST00000094892 // Il11 // interleukin 11 // 7 A1|7 2.76 cM // 16156 /// BC134354 // Il11 // interleukin 11 // 7 A1|7 2.76 cM // 16156 /// U03421 // Il11 // interleukin 11 // 7 A1|7 2…	NM_001290423 // RefSeq // Mus musculus interleukin 11 (Il11), transcript variant 2, mRNA. // chr7 // 95 // 95 // 20 // 21 // 1 /// NM_008350 // RefSeq // Mus musculus interleukin 11 (Il11), transcript variant 1, mRNA. // chr7 // 81 // 81 // 17 // 21 // 1 /// ENSMUST00000163481 // ENSEMBL // havana:putative chromosome:GRCm38:7:4773233:4782857:-1 gene:ENSMUSG00000004371 gene_biotype:protein_coding …	Il11	interleukin 11	16156	3589	Mm.35814	NM_001290423//NM_008350//NP_001277352//NP_032376//XM_006539562//XP_006539625	3.03384	3.41553	3.33402	2.5717	3.17805	3.55533	2.69209	2.57946	3.15454	6.47056	5.87173	5.84932	3.0252	4.08652	3.2083	2.55467	2.92397	3.3176	5.97159	5.85805	5.15241	2.91411	2.93618	2.75096	-0.43653	3.26113	3.10169	2.8087	6.06387	3.44001	5.66068	2.86708	0.165115
			#NUM!				#NUM!	17468602	NM_026860 // Gkn3 // gastrokine 3 // 6 D1|6 // 68888 /// ENSMUST00000032127 // Gkn3 // gastrokine 3 // 6 D1|6 // 68888 /// BC116955 // Gkn3 // gastrokine 3 // 6 D1|6 // 68888 /// GU220566 // Gkn3 // gastrokine 3 // 6 D1|6 // 68888	NM_026860 // RefSeq // Mus musculus gastrokine 3 (Gkn3), mRNA. // chr6 // 100 // 100 // 27 // 27 // 1 /// ENSMUST00000032127 // ENSEMBL // ensembl_havana_transcript:known chromosome:GRCm38:6:87383268:87388935:-1 gene:ENSMUSG00000030048 gene_biotype:protein_coding transcript_biotype:protein_coding // chr6 // 100 // 100 // 27 // 27 // 1 /// BC116955 // GenBank // Mus musculus RIKEN cDNA 1190003M12 …	Gkn3	gastrokine 3	68888	#N/A	Mm.46387	NM_026860//NP_081136	2.6113	2.06741	2.35924	3.00224	5.65982	4.50346	2.41367	2.37357	2.04533	7.575	7.94076	7.619	2.12464	2.15362	2.151	3.1506	4.00836	1.96084	8.1825	8.08967	8.09754	8.31786	8.2525	6.63148	0.189771	2.34598	4.38851	2.27752	7.71158	2.14309	8.12323	7.73395	0.38613
			#NUM!				#NUM!	17293348	NM_001145801 // Ctla2b // cytotoxic T lymphocyte-associated protein 2 beta // 13|13 // 13025 /// ENSMUST00000171347 // Ctla2b // cytotoxic T lymphocyte-associated protein 2 beta // 13|13 // 13025	NM_001145801 // RefSeq // Mus musculus cytotoxic T lymphocyte-associated protein 2 beta (Ctla2b), transcript variant 2, mRNA. // chr13 // 100 // 100 // 10 // 10 // 0 /// ENSMUST00000171347 // ENSEMBL // ensembl:known chromosome:GRCm38:13:60895351:60897447:-1 gene:ENSMUSG00000074874 gene_biotype:protein_coding transcript_biotype:protein_coding // chr13 // 100 // 100 // 10 // 10 // 0	Ctla2b	cytotoxic T lymphocyte-associated protein 2 beta	13025	#N/A	Mm.30144	NM_001145801//NM_007797//NP_001139273//NP_031823//XR_382421	3.86374	4.12767	3.46842	3.86544	3.8443	3.63245	3.63879	3.33193	3.9026	6.7481	6.97028	7.20043	4.83433	4.23676	4.25449	4.0175	4.09192	4.93999	5.96111	5.28644	4.08305	4.3033	3.60905	3.57503	0.0947085	3.81994	3.78073	3.62444	6.97294	4.44186	5.1102	3.82912	0.0750051
5.73106e-06	0.433162	0.433162	-1.20702	0.134999	0.626883	1	0	17412102	NM_010281 // Ggh // gamma-glutamyl hydrolase // 4 A3|4 // 14590 /// ENSMUST00000098242 // Ggh // gamma-glutamyl hydrolase // 4 A3|4 // 14590 /// AF051102 // Ggh // gamma-glutamyl hydrolase // 4 A3|4 // 14590 /// BC150898 // Ggh // gamma-glutamyl hydrolase // 4 A3|4 // 14590 /// XM_006537619 // Ggh // gamma-glutamyl hydrolase // 4 A3|4 // 14590 /// BC009809 // Ggh // gamma-glutamyl hydrolase // 4 …	NM_010281 // RefSeq // Mus musculus gamma-glutamyl hydrolase (Ggh), mRNA. // chr4 // 90 // 90 // 28 // 31 // 1 /// ENSMUST00000098242 // ENSEMBL // ensembl_havana_transcript:known chromosome:GRCm38:4:20042052:20066750:1 gene:ENSMUSG00000073987 gene_biotype:protein_coding transcript_biotype:protein_coding // chr4 // 100 // 100 // 31 // 31 // 1 /// AF051102 // GenBank // Mus musculus gamma glutamyl…	Ggh	gamma-glutamyl hydrolase	14590	8836	Mm.20461	NM_010281//NP_034411//XM_006537619//XP_006537682	6.01739	6.58366	6.22019	5.33815	5.45545	5.62482	5.33649	7.14675	6.16291	9.04439	8.69138	8.66623	6.36618	6.23905	6.47005	6.27825	6.35127	6.89285	7.38886	7.4281	7.46597	7.32932	7.6114	7.012	-0.258824	6.27375	5.47281	6.21539	8.80067	6.35843	7.42764	7.31758	0.196501
0.608879	1.11454	1	0	0.497047	0.913943	1	0	17381589	NM_010582 // Itih2 // inter-alpha trypsin inhibitor, heavy chain 2 // 2 A1|2 6.89 cM // 16425 /// ENSMUST00000042290 // Itih2 // inter-alpha trypsin inhibitor, heavy chain 2 // 2 A1|2 6.89 cM // 16425 /// BC034341 // Itih2 // inter-alpha trypsin inhibitor, heavy chain 2 // 2 A1|2 6.89 cM // 16425 /// ENSMUST00000155809 // Itih2 // inter-alpha trypsin inhibitor, heavy chain 2 // 2 A1|2 6.89 cM // …	NM_010582 // RefSeq // Mus musculus inter-alpha trypsin inhibitor, heavy chain 2 (Itih2), mRNA. // chr2 // 88 // 88 // 23 // 26 // 1 /// ENSMUST00000042290 // ENSEMBL // ensembl_havana_transcript:known chromosome:GRCm38:2:10094593:10130663:-1 gene:ENSMUSG00000037254 gene_biotype:protein_coding transcript_biotype:protein_coding // chr2 // 85 // 85 // 22 // 26 // 1 /// BC034341 // GenBank // Mus mu…	Itih2	inter-alpha trypsin inhibitor, heavy chain 2	16425	3698	Mm.182043	NM_010582//NP_034712	2.80841	3.12315	3.44225	2.98239	4.09235	3.4385	2.95518	3.40348	3.05165	6.86399	7.08313	6.75723	3.15473	2.70772	2.83621	3.1012	3.12854	3.07023	5.48527	5.29723	6.35224	5.12086	4.77403	4.57261	-0.0342989	3.1246	3.50442	3.13677	6.90145	2.89955	5.71158	4.8225	0.10959
8.05741e-05	2.40068	2.40068	1.26344	0.328603	1.24041	1	0	17212252	NM_010553 // Il18rap // interleukin 18 receptor accessory protein // 1 B|1 // 16174 /// XM_006495711 // Il18rap // interleukin 18 receptor accessory protein // 1 B|1 // 16174 /// ENSMUST00000027237 // Il18rap // interleukin 18 receptor accessory protein // 1 B|1 // 16174 /// ENSMUST00000163057 // Il18rap // interleukin 18 receptor accessory protein // 1 B|1 // 16174 /// AF077347 // Il18rap // int…	NM_010553 // RefSeq // Mus musculus interleukin 18 receptor accessory protein (Il18rap), mRNA. // chr1 // 100 // 100 // 26 // 26 // 0 /// XM_006495711 // RefSeq // PREDICTED: Mus musculus interleukin 18 receptor accessory protein (Il18rap), transcript variant X4, mRNA. // chr1 // 100 // 54 // 14 // 14 // 0 /// ENSMUST00000027237 // ENSEMBL // ensembl_havana_transcript:known chromosome:GRCm38:1:40…	Il18rap	interleukin 18 receptor accessory protein	16174	8807	Mm.20466//Mm.392521	NM_010553//NP_034683//XM_006495708//XM_006495709//XM_006495710//XM_006495711//XM_006495712//XP_006495771//XP_006495772//XP_006495773//XP_006495774//XP_006495775	3.65236	3.9543	4.20974	4.49021	4.22639	3.95712	4.11561	3.99332	4.61689	8.19647	7.40708	8.11715	5.98557	5.20426	5.51279	3.64657	5.88314	6.142	5.39075	5.5977	5.27362	3.08414	2.99847	3.64774	-0.2594	3.9388	4.22457	4.24194	7.9069	5.56754	5.42069	3.24345	0.120374
			#NUM!				#NUM!	17544396	ENSMUST00000130431 // 4930570D08Rik // RIKEN cDNA 4930570D08 gene // --- // --- /// AK019796 // 4930570D08Rik // RIKEN cDNA 4930570D08 gene // X|X // 78225	ENSMUST00000130431 // ENSEMBL // havana:putative chromosome:GRCm38:X:133898699:133901213:-1 gene:ENSMUSG00000084875 gene_biotype:processed_transcript transcript_biotype:processed_transcript // chrX // 100 // 100 // 14 // 14 // 1 /// AK019796 // GenBank HTC // Mus musculus adult male testis cDNA, RIKEN full-length enriched library, clone:4930570D08 product:unclassifiable, full insert sequence. // …	4930570D08Rik	RIKEN cDNA 4930570D08 gene	78225	#N/A	NA	NA	1.88045	2.77629	2.88443	2.05731	2.37882	1.92999	1.96964	2.47475	2.21078	5.052	5.19845	5.34739	1.88048	1.60531	1.97253	2.1869	1.82363	2.08565	4.31634	3.39538	2.20209	1.48244	2.15312	1.86724	-0.221024	2.51372	2.12204	2.21839	5.19928	1.81944	3.3046	1.83426	0.0958691
0.611349	1.12046	1	0	0.31564	1.53599	1	0	17330359	NM_134102 // Pla1a // phospholipase A1 member A // 16 B4|16 26.83 cM // 85031 /// XM_006522771 // Pla1a // phospholipase A1 member A // 16 B4|16 26.83 cM // 85031 /// XM_006522773 // Pla1a // phospholipase A1 member A // 16 B4|16 26.83 cM // 85031 /// ENSMUST00000002926 // Pla1a // phospholipase A1 member A // 16 B4|16 26.83 cM // 85031 /// AF063498 // Pla1a // phospholipase A1 member A // 16 B4|…	NM_134102 // RefSeq // Mus musculus phospholipase A1 member A (Pla1a), mRNA. // chr16 // 100 // 100 // 24 // 24 // 0 /// XM_006522771 // RefSeq // PREDICTED: Mus musculus phospholipase A1 member A (Pla1a), transcript variant X1, mRNA. // chr16 // 100 // 92 // 22 // 22 // 0 /// XM_006522773 // RefSeq // PREDICTED: Mus musculus phospholipase A1 member A (Pla1a), transcript variant X3, mRNA. // chr1…	Pla1a	phospholipase A1 member A	85031	51365	Mm.279805	NM_134102//NP_598863//XM_006522771//XM_006522772//XM_006522773//XM_006522774//XP_006522834//XP_006522835//XP_006522836//XP_006522837	3.39555	4.58087	3.33187	3.76173	4.28662	4.11707	4.04346	4.58729	4.42222	8.23571	7.29804	8.43355	5.77582	6.22103	5.80149	3.61822	5.3603	6.12552	6.40465	6.15421	6.20752	3.80949	3.04884	3.00265	-0.563436	3.76943	4.05514	4.35099	7.9891	5.93278	6.25546	3.28699	0.214955
0.00464425	1.53844	1.53844	0.621465	0.000210333	2.23192	2.23192	1.15828	17232235	NM_010217 // Ctgf // connective tissue growth factor // 10 A3-B1|10 11.84 cM // 14219 /// ENSMUST00000020171 // Ctgf // connective tissue growth factor // 10 A3-B1|10 11.84 cM // 14219 /// ENSMUST00000176228 // Ctgf // connective tissue growth factor // 10 A3-B1|10 11.84 cM // 14219 /// BC006783 // Ctgf // connective tissue growth factor // 10 A3-B1|10 11.84 cM // 14219 /// M70642 // Ctgf // conn…	NM_010217 // RefSeq // Mus musculus connective tissue growth factor (Ctgf), mRNA. // chr10 // 100 // 88 // 21 // 21 // 0 /// ENSMUST00000020171 // ENSEMBL // ensembl_havana_transcript:known chromosome:GRCm38:10:24595442:24598678:1 gene:ENSMUSG00000019997 gene_biotype:protein_coding transcript_biotype:protein_coding // chr10 // 100 // 88 // 21 // 21 // 0 /// ENSMUST00000176228 // ENSEMBL // havana…	Ctgf	connective tissue growth factor	14219	1490	Mm.390287	NM_010217//NP_034347	4.84295	5.58382	5.69051	4.32394	4.95013	4.78528	5.5455	5.52419	5.47872	8.0629	8.45292	7.99112	5.64853	6.65663	5.71041	5.11845	4.76044	5.95898	8.13377	7.81503	6.51709	5.31647	5.68151	5.97071	-0.172184	5.37243	4.68645	5.51614	8.16898	6.00519	7.48863	5.65623	0.140122
			#NUM!				#NUM!	17295196	NM_010217 // Ctgf // connective tissue growth factor // 10 A3-B1|10 11.84 cM // 14219 /// ENSMUST00000020171 // Ctgf // connective tissue growth factor // 10 A3-B1|10 11.84 cM // 14219 /// ENSMUST00000176228 // Ctgf // connective tissue growth factor // 10 A3-B1|10 11.84 cM // 14219 /// BC006783 // Ctgf // connective tissue growth factor // 10 A3-B1|10 11.84 cM // 14219 /// M70642 // Ctgf // conn…	NM_010217 // RefSeq // Mus musculus connective tissue growth factor (Ctgf), mRNA. // chr10 // 100 // 88 // 21 // 21 // 0 /// ENSMUST00000020171 // ENSEMBL // ensembl_havana_transcript:known chromosome:GRCm38:10:24595442:24598678:1 gene:ENSMUSG00000019997 gene_biotype:protein_coding transcript_biotype:protein_coding // chr10 // 100 // 88 // 21 // 21 // 0 /// ENSMUST00000176228 // ENSEMBL // havana…	Ankdd1b	ankyrin repeat and death domain containing 1B	271144	728780	Mm.470057	NM_001042714//NP_001036179//XM_006517681//XM_006517682//XM_006517683//XM_006517684//XM_006517685//XP_006517744//XP_006517745//XP_006517746//XP_006517747//XP_006517748	2.78752	3.35593	2.39247	2.88785	4.08109	3.33087	3.09482	2.73655	3.02356	6.86729	6.78896	6.92952	2.81441	3.18466	3.17173	2.80857	3.48565	2.70667	4.37198	4.27118	4.39766	7.10074	7.19685	5.81684	-0.0141758	2.84531	3.43327	2.95164	6.86192	3.05693	4.34694	6.70481	0.136694
8.38932e-06	0.163774	0.163774	-2.61022	0.736939	1.04534	1	0	17309557	NM_053079 // Slc15a1 // solute carrier family 15 (oligopeptide transporter), member 1 // 14 E5|14 // 56643 /// ENSMUST00000088386 // Slc15a1 // solute carrier family 15 (oligopeptide transporter), member 1 // 14 E5|14 // 56643 /// AF205540 // Slc15a1 // solute carrier family 15 (oligopeptide transporter), member 1 // 14 E5|14 // 56643 /// BC116248 // Slc15a1 // solute carrier family 15 (oligopept…	NM_053079 // RefSeq // Mus musculus solute carrier family 15 (oligopeptide transporter), member 1 (Slc15a1), mRNA. // chr14 // 100 // 100 // 36 // 36 // 0 /// ENSMUST00000088386 // ENSEMBL // ensembl:known chromosome:GRCm38:14:121459621:121505254:-1 gene:ENSMUSG00000025557 gene_biotype:protein_coding transcript_biotype:protein_coding // chr14 // 100 // 100 // 36 // 36 // 0 /// AF205540 // GenBank…	Slc15a1	solute carrier family 15 (oligopeptide transporter), member 1	56643	6564	Mm.155618	NM_053079//NP_444309	3.7919	4.23708	5.11322	5.90951	5.99032	4.99929	8.78996	8.26183	8.183	2.78203	2.41062	4.03227	5.3681	3.3081	5.00923	6.20024	3.74761	5.30656	3.03282	3.1245	2.96814	5.57886	5.96142	6.06835	-0.309716	4.38073	5.63304	8.41159	3.07497	4.56181	3.04182	5.86954	0.559315
0.907373	1.05598	1	0	0.202941	0.681812	1	0	17410636	NM_001163457 // Mttp // microsomal triglyceride transfer protein // 3 G3|3 64.06 cM // 17777 /// NM_008642 // Mttp // microsomal triglyceride transfer protein // 3 G3|3 64.06 cM // 17777 /// ENSMUST00000029805 // Mttp // microsomal triglyceride transfer protein // 3 G3|3 64.06 cM // 17777 /// ENSMUST00000098580 // Mttp // microsomal triglyceride transfer protein // 3 G3|3 64.06 cM // 17777 /// BC…	NM_001163457 // RefSeq // Mus musculus microsomal triglyceride transfer protein (Mttp), transcript variant 1, mRNA. // chr3 // 94 // 94 // 34 // 36 // 1 /// NM_008642 // RefSeq // Mus musculus microsomal triglyceride transfer protein (Mttp), transcript variant 2, mRNA. // chr3 // 83 // 83 // 30 // 36 // 1 /// ENSMUST00000029805 // ENSEMBL // ensembl:known chromosome:GRCm38:3:138089855:138131377:-…	Mttp	microsomal triglyceride transfer protein	17777	4547	Mm.2941	NM_001163457//NM_008642//NP_001156929//NP_032668//XM_006501102//XM_006501103//XP_006501165//XP_006501166	3.85412	3.91256	3.32733	8.86836	8.84958	8.31602	5.04173	4.25539	5.27966	4.13288	4.24143	4.81674	4.28174	4.07982	4.48627	4.14852	8.27211	4.43434	4.98205	4.98681	5.29918	4.23384	3.76149	4.4138	0.181248	3.698	8.67799	4.85893	4.39702	4.28261	5.08935	4.13638	0.133195
1.9395e-06	0.258212	0.258212	-1.95337	0.532669	0.684081	1	0	17354157	NM_009258 // Spink3 // serine peptidase inhibitor, Kazal type 3 // 18 B3|18 // 20730 /// ENSMUST00000025381 // Spink3 // serine peptidase inhibitor, Kazal type 3 // 18 B3|18 // 20730 /// BC086887 // Spink3 // serine peptidase inhibitor, Kazal type 3 // 18 B3|18 // 20730 /// X06342 // Spink3 // serine peptidase inhibitor, Kazal type 3 // 18 B3|18 // 20730	NM_009258 // RefSeq // Mus musculus serine peptidase inhibitor, Kazal type 3 (Spink3), mRNA. // chr18 // 100 // 100 // 28 // 28 // 1 /// ENSMUST00000025381 // ENSEMBL // ensembl:known chromosome:GRCm38:18:43728069:43737237:-1 gene:ENSMUSG00000024503 gene_biotype:protein_coding transcript_biotype:protein_coding // chr18 // 100 // 100 // 28 // 28 // 1 /// BC086887 // GenBank // Mus musculus serine …	Spink3	serine peptidase inhibitor, Kazal type 3	20730	6690	Mm.272	NM_009258//NP_033284	4.68857	8.50153	5.05434	7.53541	7.01552	7.61982	8.54289	9.07612	8.27857	4.9886	4.56328	4.21919	4.55842	4.33264	5.3266	4.81643	5.93522	4.6964	4.75005	4.07127	4.24448	4.01821	3.85289	3.53486	-0.824778	6.08148	7.39025	8.63253	4.59035	4.73922	4.35527	3.80199	1.02362
0.504634	0.78961	1	0	0.000505789	0.687573	0.687573	-0.540415	17476800	NM_001199015 // Slc7a9 // solute carrier family 7 (cationic amino acid transporter, y+ system), member 9 // 7 B2|7 // 30962 /// NM_001199016 // Slc7a9 // solute carrier family 7 (cationic amino acid transporter, y+ system), member 9 // 7 B2|7 // 30962 /// NM_021291 // Slc7a9 // solute carrier family 7 (cationic amino acid transporter, y+ system), member 9 // 7 B2|7 // 30962 /// ENSMUST00000032703…	NM_001199015 // RefSeq // Mus musculus solute carrier family 7 (cationic amino acid transporter, y+ system), member 9 (Slc7a9), transcript variant 2, mRNA. // chr7 // 90 // 90 // 28 // 31 // 1 /// NM_001199016 // RefSeq // Mus musculus solute carrier family 7 (cationic amino acid transporter, y+ system), member 9 (Slc7a9), transcript variant 3, mRNA. // chr7 // 84 // 84 // 26 // 31 // 1 /// NM_02…	Slc7a9	solute carrier family 7 (cationic amino acid transporter, y+ system), member 9	30962	11136	Mm.45874	NM_001199015//NM_001199016//NM_021291//NP_001185944//NP_001185945//NP_067266//XM_006540044//XM_006540045//XM_006540046//XM_006540047//XP_006540107//XP_006540108//XP_006540109//XP_006540110	2.36918	5.25124	3.18466	7.06925	7.04051	7.03034	5.44807	4.39938	5.04781	2.99365	3.18102	3.41824	3.37512	3.13695	3.37339	3.90113	6.5338	3.54759	2.94235	3.08889	2.97655	3.22077	2.4858	3.83853	-0.616386	3.60169	7.0467	4.96509	3.19764	3.29515	3.0026	3.1817	0.510304
0.287211	0.64356	1	0	0.303951	1.38267	1	0	17533253	NM_008769 // Otc // ornithine transcarbamylase // X A1|X 4.66 cM // 18416 /// ENSMUST00000049910 // Otc // ornithine transcarbamylase // X A1|X 4.66 cM // 18416 /// ENSMUST00000115528 // Otc // ornithine transcarbamylase // X A1|X 4.66 cM // 18416 /// BC024893 // Otc // ornithine transcarbamylase // X A1|X 4.66 cM // 18416 /// M17030 // Otc // ornithine transcarbamylase // X A1|X 4.66 cM // 18416	NM_008769 // RefSeq // Mus musculus ornithine transcarbamylase (Otc), mRNA. // chrX // 86 // 86 // 19 // 22 // 1 /// ENSMUST00000049910 // ENSEMBL // ensembl_havana_transcript:known chromosome:GRCm38:X:10252305:10321024:1 gene:ENSMUSG00000031173 gene_biotype:protein_coding transcript_biotype:protein_coding // chrX // 86 // 86 // 19 // 22 // 1 /// ENSMUST00000115528 // ENSEMBL // havana:novel chro…	Otc	ornithine transcarbamylase	18416	5009	Mm.2611	NM_008769//NP_032795	7.06891	7.81874	6.07148	8.84597	8.53921	7.89786	7.86655	6.92379	7.39006	3.54806	4.33233	4.06592	5.16192	3.66012	5.83963	7.30791	7.25711	5.03561	3.25267	3.8376	5.19742	2.67985	3.49571	3.22177	0.481291	6.98638	8.42768	7.39347	3.9821	4.88722	4.0959	3.13244	0.52556
0.299306	1.38694	1	0	0.662375	1.17442	1	0	17319091	NM_025622 // Lgals2 // lectin, galactose-binding, soluble 2 // 15 E1|15 // 107753 /// ENSMUST00000044584 // Lgals2 // lectin, galactose-binding, soluble 2 // 15 E1|15 // 107753	NM_025622 // RefSeq // Mus musculus lectin, galactose-binding, soluble 2 (Lgals2), mRNA. // chr15 // 100 // 100 // 14 // 14 // 0 /// ENSMUST00000044584 // ENSEMBL // ensembl:known chromosome:GRCm38:15:78850862:78855529:-1 gene:ENSMUSG00000043501 gene_biotype:protein_coding transcript_biotype:protein_coding // chr15 // 100 // 100 // 14 // 14 // 0 /// GENSCAN00000034725 // ENSEMBL // cdna:genscan c…	Lgals2	lectin, galactose-binding, soluble 2	107753	3957	Mm.390793	NM_025622//NP_079898	6.23842	5.96771	5.93662	10.2791	10.3369	9.53754	8.13917	7.33677	7.69621	6.34501	7.51928	7.26208	5.39588	6.78706	5.04951	5.35651	9.96476	5.07813	6.12766	5.84014	6.66899	10.7583	10.5447	10.4821	0.590814	6.04758	10.0512	7.72405	7.04212	5.74415	6.21226	10.595	0.322911
0.000105275	3.2946	3.2946	1.7201	0.368106	1.24332	1	0	17437459	NM_011402 // Slc34a2 // solute carrier family 34 (sodium phosphate), member 2 // 5 C1|5 28.92 cM // 20531 /// ENSMUST00000094787 // Slc34a2 // solute carrier family 34 (sodium phosphate), member 2 // 5 C1|5 28.92 cM // 20531 /// AF081499 // Slc34a2 // solute carrier family 34 (sodium phosphate), member 2 // 5 C1|5 28.92 cM // 20531 /// BC096369 // Slc34a2 // solute carrier family 34 (sodium phosp…	NM_011402 // RefSeq // Mus musculus solute carrier family 34 (sodium phosphate), member 2 (Slc34a2), mRNA. // chr5 // 97 // 97 // 28 // 29 // 1 /// ENSMUST00000094787 // ENSEMBL // ensembl_havana_transcript:known chromosome:GRCm38:5:53049353:53071664:1 gene:ENSMUSG00000029188 gene_biotype:protein_coding transcript_biotype:protein_coding // chr5 // 97 // 97 // 28 // 29 // 1 /// AF081499 // GenBank…	Slc34a2	solute carrier family 34 (sodium phosphate), member 2	20531	10568	Mm.284891	NM_011402//NP_035532//XM_006503807//XP_006503870	3.09099	5.48795	3.85376	7.0648	6.36363	5.96784	5.284	5.42096	5.78796	2.87257	3.05794	3.7901	3.32035	3.28386	3.68114	3.75983	5.21203	3.78762	3.39276	3.24895	3.35128	3.50977	3.6746	4.04911	-0.368956	4.14423	6.46542	5.49764	3.2402	3.42845	3.331	3.74449	0.431948
0.00415088	3.36828	3.36828	1.75201	0.54935	0.876373	1	0	17213894	NM_001080809 // Cps1 // carbamoyl-phosphate synthetase 1 // 1 C3|1 33.75 cM // 227231 /// ENSMUST00000027144 // Cps1 // carbamoyl-phosphate synthetase 1 // 1 C3|1 33.75 cM // 227231 /// BC126969 // Cps1 // carbamoyl-phosphate synthetase 1 // 1 C3|1 33.75 cM // 227231	NM_001080809 // RefSeq // Mus musculus carbamoyl-phosphate synthetase 1 (Cps1), mRNA. // chr1 // 100 // 97 // 32 // 32 // 0 /// ENSMUST00000027144 // ENSEMBL // ensembl_havana_transcript:known chromosome:GRCm38:1:67123026:67231259:1 gene:ENSMUSG00000025991 gene_biotype:protein_coding transcript_biotype:protein_coding // chr1 // 100 // 100 // 33 // 33 // 0 /// BC126969 // GenBank // Mus musculus c…	Cps1	carbamoyl-phosphate synthetase 1	227231	1373	Mm.343942	NM_001080809//NP_001074278	7.06519	4.81743	6.09638	10.0503	10.1908	10.1571	4.52081	3.36334	6.69328	4.39234	4.45122	5.0848	3.10822	3.80132	3.69129	6.42156	9.70946	3.25741	4.25515	3.9443	4.63331	3.78586	3.95702	4.45343	0.428117	5.993	10.1328	4.85914	4.64279	3.53361	4.27759	4.06544	0.884125
3.22381e-05	0.124052	0.124052	-3.01098	0.0715327	1.94455	1	0	17254508	NM_007607 // Car4 // carbonic anhydrase 4 // 11 C|11 // 12351 /// XM_006532095 // Car4 // carbonic anhydrase 4 // 11 C|11 // 12351 /// ENSMUST00000103194 // Car4 // carbonic anhydrase 4 // 11 C|11 // 12351 /// ENSMUST00000108076 // Car4 // carbonic anhydrase 4 // 11 C|11 // 12351 /// ENSMUST00000150596 // Car4 // carbonic anhydrase 4 // 11 C|11 // 12351 /// BC012704 // Car4 // carbonic anhydrase …	NM_007607 // RefSeq // Mus musculus carbonic anhydrase 4 (Car4), mRNA. // chr11 // 100 // 85 // 17 // 17 // 0 /// XM_006532095 // RefSeq // PREDICTED: Mus musculus carbonic anhydrase 4 (Car4), transcript variant X1, mRNA. // chr11 // 100 // 75 // 15 // 15 // 0 /// ENSMUST00000103194 // ENSEMBL // ensembl_havana_transcript:known chromosome:GRCm38:11:84957788:84966044:1 gene:ENSMUSG00000000805 gene…	Car4	carbonic anhydrase 4	12351	762	Mm.1641	NM_007607//NP_031633//XM_006532095//XP_006532158	9.58655	9.30053	9.26569	8.64549	8.40674	7.84094	9.22715	9.18872	8.96277	3.61993	3.85425	4.271	6.81889	4.52264	6.69511	9.05662	7.76803	6.76875	4.84454	4.34028	4.47059	5.40806	5.70897	5.4408	0.299131	9.38426	8.29772	9.12621	3.91506	6.01221	4.5518	5.51928	0.399766
			#NUM!				#NUM!	17420539	NR_002926 // Pla2g2a // phospholipase A2, group IIA (platelets, synovial fluid) // 4 D3|4 70.57 cM // 18780 /// ENSMUST00000077582 // Pla2g2a // phospholipase A2, group IIA (platelets, synovial fluid) // 4 D3|4 70.57 cM // 18780 /// ENSMUST00000135748 // Pla2g2a // phospholipase A2, group IIA (platelets, synovial fluid) // 4 D3|4 70.57 cM // 18780 /// NM_001082531 // Pla2g2a // phospholipase A2, …	NR_002926 // RefSeq // Mus musculus phospholipase A2, group IIA (platelets, synovial fluid) (Pla2g2a), non-coding RNA. // chr4 // 87 // 87 // 20 // 23 // 1 /// ENSMUST00000077582 // ENSEMBL // ensembl:known chromosome:GRCm38:4:138831857:138835183:1 gene:ENSMUSG00000058908 gene_biotype:polymorphic_pseudogene transcript_biotype:protein_coding // chr4 // 87 // 87 // 20 // 23 // 1 /// ENSMUST00000135…	Pla2g2a	phospholipase A2, group IIA (platelets, synovial fluid)	18780	#N/A	Mm.4675	NM_001082531//NM_011108//NP_001076000//NR_002926	4.68525	7.56872	5.03877	7.86677	8.35433	7.83119	7.8114	7.84659	8.08971	6.37659	5.60871	6.36892	10.3588	10.3935	10.094	5.67683	8.36165	10.3941	10.064	10.3618	10.0705	2.26717	2.29765	3.10594	-0.70106	5.76425	8.01743	7.9159	6.11807	10.2821	10.1654	2.55692	0.560639
0.0933884	0.820242	1	0	0.570808	1.09156	1	0	17464455	NM_178797 // Far2 // fatty acyl CoA reductase 2 // 6 G3|6 // 330450 /// XM_006507070 // Far2 // fatty acyl CoA reductase 2 // 6 G3|6 // 330450 /// ENSMUST00000032443 // Far2 // fatty acyl CoA reductase 2 // 6 G3|6 // 330450 /// ENSMUST00000111607 // Far2 // fatty acyl CoA reductase 2 // 6 G3|6 // 330450 /// BC055759 // Far2 // fatty acyl CoA reductase 2 // 6 G3|6 // 330450	NM_178797 // RefSeq // Mus musculus fatty acyl CoA reductase 2 (Far2), mRNA. // chr6 // 83 // 83 // 20 // 24 // 1 /// XM_006507070 // RefSeq // PREDICTED: Mus musculus fatty acyl CoA reductase 2 (Far2), transcript variant X2, mRNA. // chr6 // 79 // 79 // 19 // 24 // 1 /// ENSMUST00000032443 // ENSEMBL // havana:known chromosome:GRCm38:6:148047259:148176849:1 gene:ENSMUSG00000030303 gene_biotype:p…	Far2	fatty acyl CoA reductase 2	330450	55711	Mm.475174	NM_178797//NP_848912//XM_006507069//XM_006507070//XM_006536090//XM_006536091//XP_006507132//XP_006507133//XP_006536153//XP_006536154	6.17407	7.16887	6.29431	7.32068	7.33236	7.3847	6.7615	6.22855	7.01322	3.534	3.14377	3.89134	5.89721	4.33152	5.69362	6.83657	7.06097	5.98801	4.75266	4.69265	4.30771	5.14917	5.50072	5.83953	-0.394868	6.54575	7.34591	6.66776	3.52304	5.30745	4.58434	5.49647	0.264201
			#NUM!				#NUM!	17242311	XM_006542826 // Gm9736 // predicted gene 9736 // 10 C1|10 // 77763 /// XM_006542827 // Gm9736 // predicted gene 9736 // 10 C1|10 // 77763	XM_006542826 // RefSeq // PREDICTED: Mus musculus predicted gene 9736 (Gm9736), transcript variant X1, mRNA. // chr10 // 100 // 78 // 7 // 7 // 0 /// XM_006542827 // RefSeq // PREDICTED: Mus musculus predicted gene 9736 (Gm9736), transcript variant X2, mRNA. // chr10 // 100 // 100 // 9 // 9 // 1 /// GENSCAN00000054434 // ENSEMBL // cdna:genscan chromosome:GRCm38:10:77750432:77750821:-1 transcript…	Gm9736	predicted gene 9736	77763	#N/A	NA	XM_001477721//XM_006514354//XM_006542826//XM_006542827//XP_001477771//XP_006514417//XP_006542889//XP_006542890	7.15858	7.3275	6.44823	7.86787	8.29732	6.98031	9.30296	9.35641	8.85078	6.23681	5.90213	6.33598	6.31163	6.31838	7.66557	7.86856	6.84263	5.72031	5.73246	6.60336	6.17201	7.35728	6.27049	6.18304	0.329579	6.9781	7.71516	9.17005	6.15831	6.7652	6.16927	6.60361	0.281137
			#NUM!				#NUM!	17474797	NM_001166754 // Vmn1r157 // vomeronasal 1 receptor 157 // 7 A3|7 // 667551 /// ENSMUST00000178215 // Vmn1r157 // vomeronasal 1 receptor 157 // 7 A3|7 // 667551	NM_001166754 // RefSeq // Mus musculus vomeronasal 1 receptor 157 (Vmn1r157), mRNA. // chr7 // 100 // 100 // 8 // 8 // 1 /// ENSMUST00000178215 // ENSEMBL // ensembl_havana_transcript:known chromosome:GRCm38:7:22761697:22762590:1 gene:ENSMUSG00000095619 gene_biotype:protein_coding transcript_biotype:protein_coding // chr7 // 100 // 100 // 8 // 8 // 1	Vmn1r157	vomeronasal 1 receptor 157	667551	#N/A	Mm.484969	NM_001166754//NP_001160226	4.04919	4.33456	2.75236	5.58299	5.63548	3.87911	5.20059	5.62925	5.27198	2.67584	3.18832	3.07516	3.4303	3.31598	4.62126	5.32	2.93415	2.52506	3.58895	2.69767	3.43334	3.3722	2.37354	2.90642	0.849558	3.71204	5.03252	5.36727	2.97977	3.78918	3.23999	2.88405	0.471466
3.40544e-11	0.142907	0.142907	-2.80685	0.116761	0.600781	1	0	17340135	NM_009205 // Slc3a1 // solute carrier family 3, member 1 // 17 E4|17 55.17 cM // 20532 /// ENSMUST00000024944 // Slc3a1 // solute carrier family 3, member 1 // 17 E4|17 55.17 cM // 20532 /// BC013441 // Slc3a1 // solute carrier family 3, member 1 // 17 E4|17 55.17 cM // 20532 /// D88533 // Slc3a1 // solute carrier family 3, member 1 // 17 E4|17 55.17 cM // 20532	NM_009205 // RefSeq // Mus musculus solute carrier family 3, member 1 (Slc3a1), mRNA. // chr17 // 100 // 100 // 29 // 29 // 0 /// ENSMUST00000024944 // ENSEMBL // ensembl:known chromosome:GRCm38:17:85028347:85064243:1 gene:ENSMUSG00000024131 gene_biotype:protein_coding transcript_biotype:protein_coding // chr17 // 100 // 100 // 29 // 29 // 0 /// BC013441 // GenBank // Mus musculus solute carrier …	Slc3a1	solute carrier family 3, member 1	20532	6519	Mm.227176//Mm.461481	NM_009205//NP_033231	6.49043	8.14519	7.54563	7.78939	7.55519	7.58474	9.7113	9.09746	8.82346	5.76286	6.06806	5.89798	6.62908	4.35262	6.73462	7.66784	6.80874	6.70449	5.56025	5.79806	5.23044	3.83966	4.16774	3.90639	-0.343262	7.39375	7.64311	9.21074	5.90963	5.90544	5.52958	3.97126	0.551882
0.169806	0.735148	1	0	0.0970748	0.740965	1	0	17501787	NM_001293795 // Tm6sf2 // transmembrane 6 superfamily member 2 // 8 B3.3|8 // 107770 /// NM_181540 // Tm6sf2 // transmembrane 6 superfamily member 2 // 8 B3.3|8 // 107770 /// ENSMUST00000049197 // Tm6sf2 // transmembrane 6 superfamily member 2 // 8 B3.3|8 // 107770 /// ENSMUST00000110160 // Tm6sf2 // transmembrane 6 superfamily member 2 // 8 B3.3|8 // 107770 /// BC024498 // Tm6sf2 // transmembran…	NM_001293795 // RefSeq // Mus musculus transmembrane 6 superfamily member 2 (Tm6sf2), transcript variant 1, mRNA. // chr8 // 100 // 100 // 30 // 30 // 1 /// NM_181540 // RefSeq // Mus musculus transmembrane 6 superfamily member 2 (Tm6sf2), transcript variant 2, mRNA. // chr8 // 100 // 100 // 30 // 30 // 1 /// ENSMUST00000049197 // ENSEMBL // ensembl_havana_transcript:known chromosome:GRCm38:8:700…	Tm6sf2	transmembrane 6 superfamily member 2	107770	53345	Mm.37974	NM_001293795//NM_181540//NP_001280724//NP_853518//XM_006509533//XP_006509596	5.90269	5.81769	5.66612	7.56734	7.58895	7.34694	7.67002	7.02785	7.41109	5.52266	5.4937	5.56125	4.248	4.26026	4.06614	6.01885	6.63566	4.31435	4.60783	4.61939	4.29873	4.17184	4.26843	4.7028	0.114582	5.7955	7.50107	7.36965	5.52587	4.19147	4.50865	4.38102	0.0299292
			#NUM!				#NUM!	17467407	ENSMUST00000103336 // LOC434035 // immunoglobulin kappa-chain VK-1 // 6 C1|6 // 434035 /// L12155 // Igk-V4 // immunoglobulin kappa chain variable 4 (V4) // --- // 16121	ENSMUST00000103336 // ENSEMBL // ensembl_ig_gene:known chromosome:GRCm38:6:68862265:68863031:-1 gene:ENSMUSG00000076535 gene_biotype:IG_LV_gene transcript_biotype:IG_LV_gene // chr6 // 100 // 100 // 11 // 11 // 1 /// L12155 // GenBank // Mus musculus IgK (R15) chain mRNA with insertion deletion mutations. // chr6 // 91 // 91 // 10 // 11 // 1	Igk-V4	immunoglobulin kappa chain variable 4 (V4)	16121	#N/A	Mm.291979	NA	7.21096	7.41463	6.21288	8.77992	8.25359	7.89019	8.76372	7.67365	8.26379	6.90709	5.49973	5.81292	6.61497	6.2947	5.65635	7.60426	6.93885	6.49352	5.63822	6.16185	7.98947	4.18464	4.75135	2.67519	0.0544976	6.94616	8.3079	8.23372	6.07325	6.18867	6.59651	3.87039	0.339131
7.7013e-05	0.390981	0.390981	-1.35483	0.847384	0.959503	1	0	17252058	NM_029360 // Tm4sf5 // transmembrane 4 superfamily member 5 // 11 B3|11 // 75604 /// ENSMUST00000019063 // Tm4sf5 // transmembrane 4 superfamily member 5 // 11 B3|11 // 75604 /// ENSMUST00000141924 // Tm4sf5 // transmembrane 4 superfamily member 5 // 11 B3|11 // 75604 /// ENSMUST00000179986 // Tm4sf5 // transmembrane 4 superfamily member 5 // 11 B3|11 // 75604 /// BC010782 // Tm4sf5 // transmembr…	NM_029360 // RefSeq // Mus musculus transmembrane 4 superfamily member 5 (Tm4sf5), mRNA. // chr11 // 100 // 100 // 23 // 23 // 0 /// ENSMUST00000019063 // ENSEMBL // ensembl_havana_transcript:known chromosome:GRCm38:11:70505244:70511178:1 gene:ENSMUSG00000018919 gene_biotype:protein_coding transcript_biotype:protein_coding // chr11 // 100 // 100 // 23 // 23 // 0 /// ENSMUST00000141924 // ENSEMBL …	Tm4sf5	transmembrane 4 superfamily member 5	75604	9032	Mm.24400	NM_029360//NP_083636	5.32372	5.15871	5.08764	8.052	7.70092	8.16915	6.14331	5.74248	6.35274	4.97335	5.58183	5.49946	4.31019	4.47877	4.63145	5.45287	8.07841	4.68834	4.23965	4.11386	5.13223	7.561	6.83567	7.05958	0.084425	5.19002	7.97402	6.07951	5.35155	4.47347	4.49525	7.15208	0.0609985
2.3814e-05	0.44183	0.44183	-1.17844	0.955342	1.01743	1	0	17343488	NM_001204335 // Cyp4f14 // cytochrome P450, family 4, subfamily f, polypeptide 14 // 17 B1|17 // 64385 /// NM_001204336 // Cyp4f14 // cytochrome P450, family 4, subfamily f, polypeptide 14 // 17 B1|17 // 64385 /// NM_022434 // Cyp4f14 // cytochrome P450, family 4, subfamily f, polypeptide 14 // 17 B1|17 // 64385 /// ENSMUST00000054174 // Cyp4f14 // cytochrome P450, family 4, subfamily f, polypept…	NM_001204335 // RefSeq // Mus musculus cytochrome P450, family 4, subfamily f, polypeptide 14 (Cyp4f14), transcript variant 2, mRNA. // chr17 // 100 // 88 // 15 // 15 // 0 /// NM_001204336 // RefSeq // Mus musculus cytochrome P450, family 4, subfamily f, polypeptide 14 (Cyp4f14), transcript variant 3, mRNA. // chr17 // 100 // 88 // 15 // 15 // 0 /// NM_022434 // RefSeq // Mus musculus cytochrome …	Cyp4f14	cytochrome P450, family 4, subfamily f, polypeptide 14	64385	66002	Mm.486449	NM_001204333//NM_001204334//NM_001204335//NM_001204336//NM_022434//NP_001191262//NP_001191263//NP_001191264//NP_001191265//NP_071879//XM_006524780//XM_006524781//XM_006524782//XM_006524783//XP_006524843//XP_006524844//XP_006524845//XP_006524846	7.48154	7.39547	7.05061	8.50745	7.84187	7.63954	8.46905	8.09747	8.30647	5.49953	5.48478	5.65368	4.91416	3.49357	5.23303	7.83908	7.32055	4.81464	4.98792	4.88853	4.6852	3.87929	3.42055	3.02259	0.233934	7.3092	7.99628	8.291	5.546	4.54692	4.85388	3.44081	0.231848
0.00349335	0.263447	0.263447	-1.92442	0.780791	1.09415	1	0	17260308	NM_207242 // Npc1l1 // NPC1-like 1 // 11 A1|11 // 237636 /// XM_006514693 // Npc1l1 // NPC1-like 1 // 11 A1|11 // 237636 /// ENSMUST00000004505 // Npc1l1 // NPC1-like 1 // 11 A1|11 // 237636 /// AY437866 // Npc1l1 // NPC1-like 1 // 11 A1|11 // 237636 /// BC131789 // Npc1l1 // NPC1-like 1 // 11 A1|11 // 237636	NM_207242 // RefSeq // Mus musculus NPC1-like 1 (Npc1l1), mRNA. // chr11 // 100 // 100 // 33 // 33 // 0 /// XM_006514693 // RefSeq // PREDICTED: Mus musculus NPC1-like 1 (Npc1l1), transcript variant X1, mRNA. // chr11 // 100 // 48 // 16 // 16 // 0 /// ENSMUST00000004505 // ENSEMBL // ensembl_havana_transcript:known chromosome:GRCm38:11:6211013:6230143:-1 gene:ENSMUSG00000020447 gene_biotype:prote…	Npc1l1	NPC1-like 1	237636	29881	Mm.212492	NM_207242//NP_997125//XM_006514693//XP_006514756	3.09187	3.12756	3.45576	6.09053	5.47531	6.63672	3.97135	3.37933	4.12328	3.00181	3.07144	3.63849	3.56369	3.27348	3.30043	3.64039	4.61243	3.21641	3.45566	3.37902	3.61541	4.19327	4.39763	3.93708	-0.434097	3.22507	6.06752	3.82465	3.23725	3.3792	3.48336	4.17599	0.136004
0.748092	1.11932	1	0	0.72051	1.09617	1	0	17329423	NM_009215 // Sst // somatostatin // 16 cen-C3|16 15.0 cM // 20604 /// ENSMUST00000004480 // Sst // somatostatin // 16 cen-C3|16 15.0 cM // 20604 /// BC010770 // Sst // somatostatin // 16 cen-C3|16 15.0 cM // 20604	NM_009215 // RefSeq // Mus musculus somatostatin (Sst), mRNA. // chr16 // 100 // 100 // 21 // 21 // 0 /// ENSMUST00000004480 // ENSEMBL // ensembl:known chromosome:GRCm38:16:23889581:23890844:-1 gene:ENSMUSG00000004366 gene_biotype:protein_coding transcript_biotype:protein_coding // chr16 // 100 // 100 // 21 // 21 // 0 /// BC010770 // GenBank // Mus musculus somatostatin, mRNA (cDNA clone MGC:186…	Sst	somatostatin	20604	6750	Mm.2453	NM_009215//NP_033241	5.57818	8.09073	6.34498	5.67059	5.25201	6.03553	8.8944	8.45087	8.23363	4.07962	4.07817	4.28677	4.66593	3.97641	4.90252	7.41546	5.61113	4.67681	4.695	4.22671	3.99405	10.6821	10.4395	10.801	-0.772977	6.6713	5.65271	8.5263	4.14819	4.51495	4.30526	10.6409	0.434228
4.37019e-14	0.117125	0.117125	-3.09388				#NUM!	17528934	NM_012033 // Tinag // tubulointerstitial nephritis antigen // 9 D|9 // 26944 /// ENSMUST00000034911 // Tinag // tubulointerstitial nephritis antigen // 9 D|9 // 26944 /// ENSMUST00000184897 // Tinag // tubulointerstitial nephritis antigen // 9 D|9 // 26944 /// AF153366 // Tinag // tubulointerstitial nephritis antigen // 9 D|9 // 26944 /// BC010745 // Tinag // tubulointerstitial nephritis antigen …	NM_012033 // RefSeq // Mus musculus tubulointerstitial nephritis antigen (Tinag), mRNA. // chr9 // 100 // 100 // 30 // 30 // 1 /// ENSMUST00000034911 // ENSEMBL // ensembl_havana_transcript:known chromosome:GRCm38:9:76951693:77045794:-1 gene:ENSMUSG00000032357 gene_biotype:protein_coding transcript_biotype:protein_coding // chr9 // 100 // 100 // 30 // 30 // 1 /// ENSMUST00000184897 // ENSEMBL // …	Tinag	tubulointerstitial nephritis antigen	26944	27283	Mm.23199	NM_012033//NP_036163//XM_006511201//XM_006511202//XM_006511203//XP_006511264//XP_006511265//XP_006511266//XR_379422	5.44485	6.65476	6.18604	6.49955	6.43779	6.24391	6.58638	6.47754	6.33512	3.11952	3.77991	3.36125	4.14	3.01448	4.74388	6.10956	6.11637	4.1704	4.18737	3.84437	4.54055	5.8822	5.50309	5.98552	-0.0704212	6.09521	6.39375	6.46635	3.42023	3.96612	4.19076	5.79027	0.257571
[truncated: 50 more columns]

## Sheet: CDT
label	NAME	GWEIGHT	control1	control2	control3	f1	Cdx2 KO1	Cdx2 KO2	Cdx2 KO3	f2	Braf1	Braf2	Braf3	f3	Cdx2+Braf1	Cdx2+Braf2	Cdx2+Braf3	f4	Apc KO1	Apc KO2	Apc KO3		TCGA_16v106	Finnish data, GSE 4045
EWEIGHT			1	1	1	1	1	1	1	1	1	1	1	1	1	1	1	1	1	1	1	1	1	1
Anxa10	Anxa10	1	0.0421774	0.0764337	-0.118611		0.172088	0.374749	0.0275809		-0.393306	-0.625143	-0.459874		6.63582	7.31349	6.42714		-0.6653	-0.374332	-0.424035		3.95479	3.04591
Npy	Npy	1	-0.0563544	0.102031	-0.0456766		-0.276635	-0.147852	-0.0144936		-0.0355022	-0.236657	-0.239244		6.86944	6.21483	6.9746		0.334272	0.728679	0.874977		0	0
Chil3	Chil3	1	0.0978149	-0.0548202	-0.0429947		-0.389715	-0.417545	-1.03236		-0.0800469	0.80346	-0.748078		6.59517	5.20066	6.89975		6.12332	4.13092	5.3323
Gkn2	Gkn2	1	1.25904	0.902012	-2.16105		1.55776	3.80789	0.764023		-2.47344	-2.65276	-2.70209		6.05404	6.33494	5.96085		-2.52938	-2.41626	-2.05635		0
Ivl	Ivl	1	0.2263	-0.380055	0.153754		-0.223473	-0.706943	-0.418724		-0.193268	-0.0735211	-0.362192		5.94982	6.46613	5.34058		-0.302087	-0.180561	-0.313113
Msln	Msln	1	0.108483	-0.229455	0.120972		-0.606099	-0.428863	-0.0332042		-0.257589	-0.265885	-0.396179		5.76771	5.62627	5.95547		0.314357	-0.226712	-0.25425		0	0
Gkn1	Gkn1	1	0.901257	0.644214	-1.54547		0.895862	2.6095	-0.412496		-1.46391	-1.01687	-1.02225		5.79464	6.19474	5.60211		-1.24379	-1.4174	-1.421		0	0
Tmprss11e	Tmprss11e	1	-0.334556	-0.11558	0.450136		-0.38207	-0.631969	0.276737		-0.568917	-0.418698	-0.0528205		5.11959	5.74024	5.30988		0.363393	0.712373	0.25855			0
Dpcr1	Dpcr1	1	-0.184983	0.662921	-0.477939		2.07991	4.18141	1.73808		-0.240592	-0.662048	-0.5511		8.06674	8.0427	8.13088		-0.119204	-0.781784	-0.322507		2.1562
Gzmd	Gzmd	1	-0.00441828	-0.162811	0.16723		0.0809586	-0.0365584	-0.0871354		-0.140962	-0.188999	-0.25508		5.71655	5.02425	5.73654		0.216789	-0.366617	-0.194387
Adam28	Adam28	1	0.0601835	-0.051002	-0.00918155		0.138344	1.64814	0.857669		-0.289459	-0.512357	-0.0343353		6.39176	6.32752	6.17036		-0.578862	-0.27182	-0.358403		1.30507	0
Otop3	Otop3	1	-0.429055	0.179689	0.249366		-0.272025	0.135244	-0.152991		0.0201505	-0.047517	0.228323		6.01213	5.03243	5.38841		0.223823	0.210682	-0.0923624		0
Gzmg	Gzmg	1	0.00846286	0.349915	-0.358378		0.069369	0.0230684	1.07711		-0.219416	-0.386659	-0.225874		5.38384	5.27549	5.6266		-0.0913206	-0.344975	-0.0191599
Prap1	Prap1	1	-0.301907	0.0966173	0.205289		-0.185195	-0.928487	-0.0434606		-1.45288	-1.40259	-1.02706		4.05723	2.81252	3.50947		-3.14642	-2.62548	-2.38644		-3.51098
Mmp8	Mmp8	1	-0.0321685	0.0553135	-0.023145		0.247273	0.3166	0.038913		-0.539292	-0.638156	-0.162591		4.62752	4.03628	5.43529		1.08055	0.411265	0.520524		1.81497	0
Esp15	Esp15	1	-0.797757	0.765395	0.032362		-0.189133	-0.0440822	0.18634		0.249257	0.108388	0.232646		4.27645	5.55134	5.17595		-0.0709972	0.284596	0.706494
Ngp	Ngp	1	-0.143101	-0.0897161	0.232817		-0.372225	-0.723922	-0.337608		-1.1304	-0.690756	-0.624458		3.84272	1.94096	4.75119		0.802195	0.424135	0.985534
Gzmf	Gzmf	1	0.479184	-0.440099	-0.0390847		-0.116165	-0.137535	0.685734		0.104047	0.316387	0.234039		5.54155	4.38128	5.41042		-0.103402	-0.457308	-0.259003
Chit1	Chit1	1	-0.00684589	0.101857	-0.0950112		-0.499874	1.48861	-0.0936723		-0.362905	0.0317331	-0.143869		5.17958	4.64708	4.61647		0.443987	0.595341	0.409115		0	0
Pi15	Pi15	1	-0.168928	0.529964	-0.361036		0.701002	0.911429	0.880858		-0.783914	-0.613645	-0.428178		4.7925	4.45541	5.15663		1.20288	1.94927	0.485109		1.79374	0
Dio2	Dio2	1	-0.282104	0.416795	-0.134691		-0.352988	0.424831	-0.0729136		0.21935	-0.0665681	0.293994		5.04808	3.59998	5.48193		1.07836	3.13938	1.00395		0	0
Ripply3	Ripply3	1	-0.337838	0.228732	0.109106		-0.236058	0.603982	0.318387		-0.0745487	0.120309	-0.169158		5.42999	3.90313	4.90153		-0.323767	-0.766276	-0.473251		-3.21138	0
Il1a	Il1a	1	0.220938	-0.512849	0.291912		0.875535	1.2036	0.242671		-0.254503	-0.289674	-0.187325		4.94758	4.83118	5.3789		3.67754	3.06835	3.65783		0	0
Vtcn1	Vtcn1	1	-0.506119	-0.0536179	0.559737		1.4369	1.74383	1.37328		-0.256386	-0.231583	-0.407977		6.04091	5.09699	5.9242		3.52199	4.1968	3.52983		0	0
Ptprz1	Ptprz1	1	-0.144947	0.188914	-0.0439668		-0.826281	-0.54612	-0.985978		-0.773362	-0.8322	-0.659206		2.35248	3.53344	2.32621		2.26497	3.22665	2.20957		0	0
Muc6	Muc6	1	-0.273187	0.190508	0.0826782		0.521899	1.6507	-0.050431		-0.244475	-0.0263352	0.0782671		5.10894	4.19201	5.33455		2.21354	3.54419	1.56016		4.07997	0
Ttc9	Ttc9	1	0.152239	-0.490731	0.338492		0.140146	0.00532183	-0.104659		-1.09554	-0.468101	-0.668153		3.69757	3.62207	3.10923		0.787836	0.684425	0.360286		0.897972	0
Ppbp	Ppbp	1	0.177093	-0.283229	0.106136		0.167904	0.704487	-0.135957		-0.0311558	-0.228501	-0.088306		4.08215	3.69226	5.00594		0.211797	0.0367773	-0.139152
Cxcl17	Cxcl17	1	-0.088557	-0.402376	0.490933		0.0438865	0.556568	0.116407		-0.122571	-0.142805	-0.528451		4.42781	3.82288	4.01685		0.0691304	-0.0169203	-0.397752		1.92895
Stfa2l1	Stfa2l1	1	-0.054086	-0.116004	0.170089		0.190882	-0.0889198	0.528347		-0.290873	0.267971	-0.719219		3.75848	3.07971	5.36222		2.49994	1.61529	1.04896
Acsm3	Acsm3	1	-0.824537	1.30858	-0.484045		-2.19741	-1.88724	-2.52475		0.0897399	-0.101586	-0.0372044		1.80544	2.09055	1.55808		-1.33269	-1.7206	-0.41959		0	0
Ctla2a	Ctla2a	1	-0.877945	1.05924	-0.181299		-0.732578	-0.444302	-0.140245		0.328273	-0.36091	-0.237974		3.4974	3.00189	3.92001		1.83689	2.12319	1.94089
S100a8	S100a8	1	-0.422979	0.186029	0.23695		0.781075	0.307555	0.905229		0.0368322	0.298818	0.226732		4.73192	4.01449	5.64842		1.69578	1.38218	1.11759		2.41331	0
Lox	Lox	1	-0.708731	0.753519	-0.0447879		0.296393	0.644177	-0.0119905		0.203956	-0.0435135	-0.111523		3.88566	4.10686	4.7522		2.27821	2.73233	2.07918		1.05683	0
Tff1	Tff1	1	0.29212	0.642684	-0.934803		1.47425	2.28105	0.972944		-1.06989	-0.316843	-0.110116		4.6688	5.24022	4.90969		-0.212318	-0.332177	-0.695645		0	2.08582
Atp6v0d2	Atp6v0d2	1	0.0168566	0.0741784	-0.091035		-0.204958	-0.620496	-0.508058		-0.747472	1.92758	-0.0869782		4.6142	2.67568	4.02745		1.97488	0.461178	3.16674		0
Nav3	Nav3	1	-0.0269312	0.0331405	-0.00620931		-0.184474	-0.0340325	-0.487541		-0.499134	-0.497752	-0.266763		2.8403	3.30935	3.36589		0.979519	2.20127	0.688434		0	0
St8sia6	St8sia6	1	0.545283	-0.0846993	-0.460584		0.624802	0.713872	0.00846025		0.334191	0.14596	-0.223665		4.35338	4.50684	4.14178		-0.00412234	0.466814	1.06103		-1.2895
Il6	Il6	1	0.120184	-0.332344	0.21216		0.48538	0.204665	0.802031		-0.0389081	-0.134521	0.270993		5.31988	3.43064	4.20018		0.183381	0.468006	0.535294		1.67814	0
Nrip3	Nrip3	1	-0.112185	-0.214738	0.326923		0.293494	-0.22852	0.632037		-0.127721	-0.386171	-0.324128		3.57983	3.94487	3.6404		-0.297327	-0.0970353	-0.145405		0	0
Scel	Scel	1	-0.351037	0.0274122	0.323625		-0.392656	0.104167	-0.208284		0.196918	0.348039	0.351684		3.70029	4.2383	3.6958		0.453229	-0.010192	0.118969		0	0
Cxcr2	Cxcr2	1	-0.424172	-0.000656971	0.424829		0.249998	0.606669	0.590757		-0.516162	-0.00419172	-0.212603		4.04892	4.03224	3.86676		-0.0492077	0.273077	-0.0946217		1.32791	0
Mmp10	Mmp10	1	-0.406047	-0.0148708	0.420918		0.0736985	2.11604	1.48658		0.466831	0.712623	0.732003		5.66498	5.47501	5.65825		3.58141	4.56465	4.1622		0	0
LOC102637941	LOC102637941	1	0.351599	-0.265248	-0.0863517		-0.201924	-0.0623132	-0.20527		-0.650212	-0.329487	-0.505817		2.98352	3.61133	2.59129		-0.16592	0.216503	0.237804
Gabrp	Gabrp	1	0.21456	-0.257157	0.0425971		0.145219	0.0821697	0.190354		-0.633366	-0.522044	-0.254621		3.96995	2.45059	3.68283		-1.30314	-1.43593	-0.93918		3.2247	0
Aldh1a3	Aldh1a3	1	-0.407724	-0.193728	0.601452		0.335984	0.106396	0.437062		0.589064	0.680827	0.516319		4.6257	4.30346	4.8238		0.695433	1.12016	0.586514		0	0
Ptprn	Ptprn	1	-0.599593	0.245736	0.353857		-1.16893	-0.264851	-0.476151		-0.316728	-0.134123	0.102017		2.97805	3.47946	2.34708		-0.755025	-0.306972	-0.488178		0	0
Ptgs2	Ptgs2	1	0.198723	-0.112101	-0.0866226		0.577541	1.72768	-0.508198		-1.09491	-0.932213	-0.34536		3.86577	3.01651	3.50236		-0.377767	1.26015	0.191806		2.44848	0
Sntg1	Sntg1	1	0.269163	-0.0847275	-0.184436		-0.437811	-0.178421	0.609888		0.292	-0.306198	0.068643		3.72956	3.11602	4.09435		0.630448	0.207977	0.760428		0	0
Ltf	Ltf	1	-0.184681	0.293855	-0.109173		2.2754	1.92821	1.84028		-0.107894	0.256353	0.491112		6.12137	4.94477	6.37605		1.20907	2.03922	1.31061		0	0
Ifitm6	Ifitm6	1	-0.254713	-0.271201	0.525914		-0.395288	0.0456042	0.653194		-0.585121	-0.0366243	-0.311056		3.46546	2.07895	4.58231		0.0850439	-0.0494596	-0.232233
Npnt	Npnt	1	-0.310215	-0.135578	0.445793		-0.00696807	-0.075193	-0.202382		-0.950362	-1.04639	-0.817475		2.09587	3.10224	2.45155		0.306437	1.25667	0.308139		0
Gm12603	Gm12603	1	0.0205853	-0.0741126	0.0535273		0.10424	1.02279	0.138455		-0.149017	0.306036	-0.103944		3.94362	4.73573	3.36497		-0.0504846	-0.384816	-0.0793944
F5	F5	1	-0.459038	-0.0956792	0.554717		0.803916	0.847185	0.407138		-0.287225	-0.182041	-0.34893		3.7278	4.02779	4.19338		0.638353	1.69327	1.53582		2.64431	0
Vsig2	Vsig2	1	0.984988	-2.04194	1.05695		1.22519	1.34336	1.22609		-3.29828	-2.41382	-2.39047		2.28911	1.85214	2.24505		-2.31185	-3.07956	-2.85352		0
Muc1	Muc1	1	-0.408891	1.05486	-0.645968		-1.32381	-0.196014	-0.33765		-0.486261	1.75707	0.583792		3.97945	3.32736	3.3489		-0.542139	-0.796544	-0.524023
Porcn	Porcn	1	-0.0746717	0.129794	-0.0551224		-0.176869	-0.60509	-1.2992		-0.374574	-0.514171	-0.542088		2.52315	2.12345	2.4964		0.313281	0.174113	-0.0839845		0	0
Tspan6	Tspan6	1	-0.484066	0.561213	-0.0771469		0.116199	0.557609	0.0780268		-0.391523	-0.449798	0.0518066		3.58769	3.47384	3.51343		0.0756563	0.220564	0.319927		-1.23862	-1.17487
S100a9	S100a9	1	0.221091	-0.0708138	-0.150277		-0.00272419	0.136951	1.13916		-0.138703	0.21658	-0.353297		3.8837	3.05412	4.65425		1.46228	1.12374	0.792226		1.04706	0
Col12a1	Col12a1	1	-0.150724	-0.242083	0.392807		-0.36618	-0.00445407	-1.02624		-0.470408	0.0230426	-0.204193		2.41103	3.07503	3.05773		0.685215	1.71235	0.590888		0.656608
Scara5	Scara5	1	-0.205445	0.0941828	0.111262		-0.0250178	-0.0537653	0.297441		-0.0790631	-0.680112	-0.235489		3.3142	2.5765	3.91276		0.4777	0.232217	-0.208376		-1.40302
Cxcl3	Cxcl3	1	-0.254529	0.671591	-0.417062		-0.573259	1.00737	1.94165		-0.196253	0.906745	-0.132661		4.07707	4.19513	5.16542		1.34608	1.68542	1.98233
Gzmc	Gzmc	1	-0.118424	-0.169617	0.288041		-0.274911	-0.507311	-0.315787		-0.42048	-0.493556	-0.652333		2.74977	2.31376	2.71464		0.62142	0.342561	0.519445
Ankrd1	Ankrd1	1	0.690376	-0.688217	-0.00215865		-0.583557	-1.07009	0.464988		-0.0797547	-0.368895	0.143412		2.17906	3.45372	3.13543		1.45226	3.40115	1.36073		1.04833	0
Il11	Il11	1	-0.227286	0.154398	0.072888		-0.689427	-0.0830767	0.294202		-0.569041	-0.681663	-0.106584		3.20943	2.61061	2.58819		-0.235925	0.825397	-0.0528233		0	0
Gkn3	Gkn3	1	0.26532	-0.278578	0.0132577		0.65626	3.31384	2.15747		0.067688	0.0275911	-0.300657		5.22901	5.59477	5.27301		-0.221344	-0.192359	-0.194983
Ctla2b	Ctla2b	1	0.0437953	0.30773	-0.351525		0.0454989	0.024362	-0.187488		-0.181147	-0.488013	0.0826626		2.92816	3.15034	3.38049		1.01439	0.416816	0.434546
Ggh	Ggh	1	-0.256353	0.309912	-0.0535594		-0.935594	-0.818298	-0.648929		-0.937255	0.873003	-0.110834		2.77064	2.41763	2.39248		0.0924298	-0.034701	0.196305		-1.20702	0
Itih2	Itih2	1	-0.316195	-0.00145493	0.31765		-0.142209	0.96775	0.313897		-0.169419	0.278873	-0.0729564		3.73939	3.95853	3.63262		0.0301313	-0.416883	-0.288394		0	0
Il18rap	Il18rap	1	-0.286435	0.0154982	0.270936		0.551414	0.28759	0.0183206		0.176815	0.0545185	0.678087		4.25767	3.46828	4.17835		2.04677	1.26546	1.57399		1.26344	0
4930570D08Rik	4930570D08Rik	1	-0.633268	0.262563	0.370705		-0.456412	-0.134905	-0.583733		-0.544077	-0.0389737	-0.302939		2.53828	2.68473	2.83366		-0.633238	-0.908415	-0.541194
Pla1a	Pla1a	1	-0.373883	0.811441	-0.437558		-0.00770463	0.517193	0.347643		0.274029	0.817858	0.65279		4.46628	3.52861	4.66411		2.00639	2.45159	2.03206		0	0
Ctgf	Ctgf	1	-0.529477	0.211392	0.318085		-1.04849	-0.422302	-0.58715		0.173073	0.151763	0.106287		2.69047	3.08049	2.6187		0.276104	1.2842	0.337981		0.621465	1.15828
Ankdd1b	Ankdd1b	1	-0.0577872	0.510623	-0.452836		0.0425401	1.23577	0.485558		0.249515	-0.108759	0.178247		4.02198	3.94365	4.08421		-0.0309054	0.339351	0.326415
fakegene1	fakegene1	1
Slc15a1	Slc15a1	1	-0.588831	-0.143651	0.732482		1.52878	1.60959	0.618557		4.40923	3.88109	3.80226		-1.59871	-1.97012	-0.348463		0.98737	-1.07263	0.628493		-2.61022	0
Mttp	Mttp	1	0.156116	0.214556	-0.370672		5.17036	5.15157	4.61801		1.34372	0.557386	1.58166		0.434881	0.543423	1.11874		0.583731	0.381815	0.788267		0	0
Spink3	Spink3	1	-1.39291	2.42005	-1.02714		1.45393	0.93404	1.53834		2.46141	2.99464	2.19709		-1.09288	-1.5182	-1.86229		-1.52306	-1.74884	-0.754885		-1.95337	0
Slc7a9	Slc7a9	1	-1.23251	1.64954	-0.417032		3.46755	3.43882	3.42865		1.84637	0.797688	1.44612		-0.608047	-0.420677	-0.183453		-0.226578	-0.464748	-0.2283		0	-0.540415
Otc	Otc	1	0.0825306	0.832364	-0.914895		1.85959	1.55283	0.911477		0.880167	-0.062585	0.403683		-3.43832	-2.65405	-2.92046		-1.82446	-3.32626	-1.14675		0	0
Lgals2	Lgals2	1	0.190838	-0.0798718	-0.110966		4.23151	4.28931	3.48996		2.09158	1.28919	1.64862		0.29743	1.47169	1.21449		-0.651706	0.73948	-0.998079		0	0
Slc34a2	Slc34a2	1	-1.05324	1.34372	-0.290476		2.92057	2.2194	1.8236		1.13977	1.27673	1.64373		-1.27167	-1.08629	-0.354136		-0.823887	-0.860369	-0.463093		1.7201	0
Cps1	Cps1	1	1.07219	-1.17557	0.10338		4.05735	4.19778	4.16415		-1.47219	-2.62966	0.700283		-1.60066	-1.54178	-0.908198		-2.88478	-2.19168	-2.3017		1.75201	0
Car4	Car4	1	0.202295	-0.0837254	-0.11857		-0.738768	-0.977523	-1.54331		-0.157107	-0.195536	-0.42149		-5.76433	-5.53001	-5.11326		-2.56537	-4.86162	-2.68915		-3.01098	0
Pla2g2a	Pla2g2a	1	-1.079	1.80447	-0.725475		2.10252	2.59009	2.06694		2.04715	2.08234	2.32546		0.612341	-0.15554	0.604669		4.59453	4.62927	4.32975
Far2	Far2	1	-0.371683	0.623124	-0.251441		0.774927	0.786614	0.838947		0.215753	-0.317204	0.467473		-3.01175	-3.40198	-2.65441		-0.648543	-2.21423	-0.852132		0	0
Gm9736	Gm9736	1	0.180474	0.349395	-0.529869		0.889766	1.31921	0.002203		2.32485	2.37831	1.87268		-0.741295	-1.07597	-0.642119		-0.666469	-0.659719	0.68747
Vmn1r157	Vmn1r157	1	0.337151	0.622525	-0.959676		1.87096	1.92344	0.167068		1.48856	1.91721	1.55994		-1.0362	-0.523719	-0.636874		-0.281735	-0.396057	0.909223
Slc3a1	Slc3a1	1	-0.903316	0.751438	0.151878		0.395647	0.161439	0.190994		2.31755	1.70371	1.42971		-1.63088	-1.32569	-1.49577		-0.764672	-3.04112	-0.659131		-2.80685	0
Tm6sf2	Tm6sf2	1	0.107192	0.0221882	-0.12938		1.77184	1.79345	1.55144		1.87453	1.23236	1.61559		-0.27284	-0.301795	-0.234252		-1.54749	-1.53524	-1.72936		0	0
Igk-V4	Igk-V4	1	0.2648	0.468475	-0.733275		1.83376	1.30743	0.944032		1.81757	0.727492	1.31764		-0.0390647	-1.44642	-1.13324		-0.331188	-0.651457	-1.2898
Tm4sf5	Tm4sf5	1	0.133695	-0.0313115	-0.102384		2.86198	2.5109	2.97913		0.953287	0.552457	1.16272		-0.216672	0.391811	0.309439		-0.879831	-0.711255	-0.558568		-1.35483	0
Cyp4f14	Cyp4f14	1	0.172336	0.0862614	-0.258597		1.19825	0.532663	0.330333		1.15985	0.788269	0.997269		-1.80968	-1.82443	-1.65552		-2.39504	-3.81563	-2.07617		-1.17844	0
Npc1l1	Npc1l1	1	-0.133193	-0.0975035	0.230696		2.86546	2.25025	3.41165		0.746279	0.154266	0.898217		-0.22326	-0.153621	0.413422		0.33862	0.0484144	0.0753635		-1.92442	0
Sst	Sst	1	-1.09312	1.41943	-0.326314		-1.00071	-1.41929	-0.635764		2.22311	1.77958	1.56233		-2.59168	-2.59313	-2.38453		-2.00537	-2.69489	-1.76878		0	0
Tinag	Tinag	1	-0.650368	0.559545	0.0908231		0.404337	0.34257	0.148693		0.491162	0.382325	0.239907		-2.97569	-2.3153	-2.73397		-1.95521	-3.08074	-1.35133		-3.09388
Genes chosen for q-RT-PCR were marked as red.
