# Supplementary material for: BRAFV600E cooperates with CDX2 inactivation to promote serrated colorectal tumorigenesis
Source: eLife journal article supplement (doi:10.7554/elife.20331), 2017-01-10
Supplement: supp [file elife-20331-supp-v1.zip › elife_poa_e20331_Figure_8_source_data_1.xlsx]

## Sheet: Sheet1
	D: DMSO							(Reverse sign)						pairwise contrasts														2-factor Interactions, there are several I'm not showing (eg. Braf vs Cdx2 for DMSO vs AZD6224)										3 factor interaction
	A: AZD6244 (a MEK inhibitor)							means		variances		MSE	comment	A vs D		Compare		Compare		Compare		Compare		Compare		Compare		Cdx2 by Braf		Cdx2 by Braf		CDX2 by treatment		Braf by treatment		C+B by treatment		Is the Cdx2 by Braf
Npy	D1	D2	D3	A1	A2	A3	A4	DMSO	AZD6244	DMSO	AZD6244	17 df		for each		to NC		to NC		to Cdx2		to Cdx2		to Braf		to Braf		(CD-B)-(C-N)		(CD-B)-(C-N)								interaction bigger for
NC	21.4088	22.3631	17.5022	24.7404	23.8822	19.5468								condition		just	FC	just	FC	just	FC	just	FC	just	FC	just	FC	just	ratio	just	ratio		ratio		ratio		ratio	AZD than for DMSO
Cdx2 -/-	21.7729	21.6531	20.271	22.6547	undetermined	20.271								P-value	FC A / D	DMSO	vs NC	AZD6224	vs NC	DMSO	vs Cdx2	AZD6244	vs Cdx2	DMSO	vs Braf	AZD6244	vs Braf	DMSO	of ratios	AZD6224	of ratios	p	of ratios	p	of ratios	p	of ratios	p	ratio of
Braf V600E	20.4554	19.1584	19.723	24.2674	undetermined	undetermined	22.2335																																ratio of
Cdx2 -/- Braf V600E	12.1832	12.6908	12.0779	15.9361	16.1476	16.517																																	ratios
Npy (imputed)	D1	D2	D3	A1	A2	A3	A4
NC	21.4088	22.3631	17.5022	24.7404	23.8822	19.5468		-20.4247	-22.7231	6.63348	7.75116	2.56331	Large MSE due to NC samples	0.0966913	0.203279
Cdx2 -/-	21.7729	21.6531	20.271	22.6547	23.6547	20.271		-21.2324	-22.1935	0.696682	3.02181	2.56331		0.472224	0.513659	0.544852	0.571292	0.690408	1.44358
Braf V600E	20.4554	19.1584	19.723	24.2674	25.2674	25.2674	22.2335	-19.7789	-24.2589	0.42293	2.04549	2.56331		0.0019238	0.0448124	0.627642	1.56455	0.226135	0.344902	0.281681	2.73862	0.109465	0.238921
Cdx2 -/- Braf V600E	12.1832	12.6908	12.0779	15.9361	16.1476	16.517		-12.3173	-16.2002	0.107393	0.0864336	2.56331		0.0085804	0.0677838	9.65903e-06	275.779	0.000111932	91.9589	2.98303e-06	482.728	0.000263526	63.702	2.56401e-05	176.267	4.58724e-06	266.623	0.000334522	308.541	0.000593722	184.696	0.479274	2.52687	0.239599	0.220448	0.403335	0.333452	0.777063	0.598611
Tmprss11e	D1	D2	D3	A1	A2	A3	A4
NC	15.3635	14.5732	14.8812	17.2931	16.8405	17.4825		-14.9393	-17.2054	0.158672	0.108828	0.160226		2.41658e-06	0.207896
Cdx2 -/-	14.77	14.8741	14.6204	16.6922	16.1836	15.6057		-14.7548	-16.1605	0.0162567	0.295465	0.160226		0.000484119	0.377452	0.579844	1.1364	0.00528058	2.06322
Braf V600E	15.5332	15.8087	15.621	18.4946	18.0282	17.2122	17.1436	-15.6543	-17.7197	0.0198145	0.428371	0.160226		3.36163e-06	0.238929	0.0429515	0.609205	0.110808	0.700143	0.0136079	0.536085	8.89357e-05	0.339344
Cdx2 -/- Braf V600E	13.4665	13.1384	13.1781	17.0953	16.5596	16.605		-13.261	-16.7533	0.0320709	0.0882554	0.160226		5.80853e-09	0.0888593	8.266e-05	3.20058	0.184504	1.368	0.000271446	2.81643	0.0873846	0.663039	1.19074e-06	5.2537	0.00570803	1.95389	0.000174446	4.62312	0.862738	0.947006	0.0800437	1.81558	0.65945	1.14927	0.0167334	0.427422	0.00243333	0.204841
Dusp6	D1	D2	D3	A1	A2	A3	A4
NC	6.41635	6.2334	6.26085	8.92875	8.57305	9.00705		-6.30353	-8.83628	0.00973408	0.0535016	0.0561364		2.62478e-10	0.172809
Cdx2 -/-	5.70645	6.2615	5.82855	8.64225	8.6278	8.9049		-5.93217	-8.72498	0.0850724	0.0243297	0.0561364		5.67482e-11	0.144304	0.0718426	1.29358	0.572604	1.0802
Braf V600E	5.69865	5.93385	5.8123	7.7975	7.79115	7.5767	8.0883	-5.81493	-7.81341	0.013835	0.0441149	0.0561364		3.54511e-09	0.250264	0.0217716	1.40308	2.86652e-05	2.03196	0.552519	1.08465	0.000101329	1.88109
Cdx2 -/- Braf V600E	5.0137	5.52235	5.1944	7.62335	8.41065	7.9211		-5.24348	-7.98503	0.0664881	0.158026	0.0561364		7.59963e-11	0.149524	4.06919e-05	2.085	0.000390947	1.80406	0.00240951	1.61181	0.00135541	1.67012	0.00888467	1.48602	0.356216	0.887845	0.474532	1.14876	0.300435	0.821925	0.355133	0.835049	0.0597833	1.44821	0.455805	0.865257	0.221768	0.715486
Ivl	D1	D2	D3	A1	A2	A3	A4
NC	13.6802	13.4523	14.5051	14.2087	12.5928	13.672		-13.8792	-13.4912	0.306829	0.677309	0.528187		0.521951	1.30858
Cdx2 -/-	14.953	12.9351	15.1668	14.8505	14.7855	13.2417		-14.3517	-14.2926	1.51635	0.829244	0.528187		0.921831	1.04182	0.436893	0.720731	0.194572	0.573805
Braf V600E	12.5869	12.8647	13.9854	14.4201	15.4445	14.3326	14.3892	-13.1456	-14.6466	0.548129	0.284267	0.528187		0.0150465	0.353317	0.233188	1.66275	0.0528138	0.448943	0.0580376	2.30703	0.532099	0.782396
Cdx2 -/- Braf V600E	11.6992	11.7088	11.1884	14.3793	13.947	13.776		-11.5322	-14.0341	0.0886291	0.0966998	0.528187		0.000580847	0.176538	0.00102164	5.08783	0.373042	0.68639	0.000184902	7.05926	0.66863	1.19621	0.0145834	3.05989	0.285209	1.5289	0.0236313	4.24553	0.0999228	2.6645	0.699985	0.796143	0.032727	0.27	0.00310004	0.134908	0.572586	0.6276
Tff1	D1	D2	D3	A1	A2	A3	A4
NC	16.6345	17.7877	16.6881	16.2737	15.5323	16.3082		-17.0368	-16.038	0.423644	0.192173	0.153523		0.00620786	1.99822
Cdx2 -/-	10.0825	9.7684	10.1905	9.3736	9.73565	9.69185		-10.0138	-9.60037	0.0480819	0.039047	0.153523		0.213543	1.33185	6.49731e-14	130.054	2.70767e-13	86.6834
Braf V600E	15.9128	16.0556	16.2304	15.1083	15.0111	13.9893	14.6242	-16.0663	-14.6832	0.0253028	0.257734	0.153523		0.000243537	2.60824	0.00749777	1.95952	0.000297778	2.55773	7.40774e-13	0.015067	4.24476e-12	0.0295066
Cdx2 -/- Braf V600E	10.4917	10.1649	10.5503	12.0327	11.7857	12.5378		-10.4023	-12.1187	0.0431246	0.146969	0.153523		5.14187e-05	0.304304	1.65403e-13	99.3513	7.3262e-10	15.1299	0.241207	0.763923	4.5445e-07	0.174542	2.17296e-12	50.7019	1.4136e-07	5.91538	0.00799054	0.389852	9.11246e-08	0.0682412	0.213094	0.666518	0.392498	1.30528	1.43068e-05	0.152287	0.000942761	0.175044
Gkn2	D1	D2	D3	A1	A2	A3	A4
NC	16.0711	16.5386	15.4151	15.4936	13.5145	14.7145		-16.0083	-14.5742	0.318501	0.993919	0.453646		0.0183862	2.70204
Cdx2 -/-	13.5889	14.1672	13.8036	14.7369	14.1117	14.5779		-13.8532	-14.4755	0.0854685	0.105588	0.453646		0.27352	0.649634	0.00110586	4.45384	0.859686	1.07081
Braf V600E	15.6729	14.9995	16.5344	14.7387	15.3015	14.3785	15.5374	-15.7356	-14.989	0.591888	0.27795	0.453646		0.16491	1.67779	0.626353	1.20805	0.43117	0.750119	0.00324311	0.271238	0.332165	0.700517
Cdx2 -/- Braf V600E	10.7467	12.8729	11.4717	13.7299	12.9415	13.0912		-11.6971	-13.2542	1.16834	0.175352	0.453646		0.011518	0.339837	4.80563e-07	19.8511	0.028109	2.49669	0.00110129	4.45708	0.0402387	2.33159	1.14759e-06	16.4323	0.00361748	3.32839	0.0269176	3.68948	0.0442313	3.1083	0.0170502	0.240424	0.374027	0.620932	0.0012949	0.125771	0.822034	0.842476
Otop3	D1	D2	D3	A1	A2	A3	A4
NC	17.6759	19.2483	18.6791	17.9483	20.236	17.479		-18.5344	-18.5545	0.633814	2.17586	0.547345		0.973952	0.986221
Cdx2 -/-	14.0768	14.2158	14.0127	13.2855	13.0828	12.8871		-14.1018	-13.0851	0.0107755	0.0396748	0.547345		0.110636	2.02326	1.15888e-06	21.5956	6.50596e-08	44.304
Braf V600E	18.7102	18.8799	19.8589	19.563	19.442	18.2114	20.0169	-19.1496	-19.3083	0.384472	0.596017	0.547345		0.782242	0.895847	0.322749	0.652839	0.199756	0.593015	2.00599e-07	0.0302302	3.69442e-09	0.0133851
Cdx2 -/- Braf V600E	13.2834	14.3511	13.2666	15.3823	15.984	15.3488		-13.6337	-15.5717	0.386031	0.127776	0.547345		0.00515486	0.260975	3.01405e-07	29.8729	0.000124831	7.90501	0.449035	1.38329	0.00072065	0.178426	5.76506e-08	45.7585	4.39551e-06	13.3302	0.22186	2.11888	0.0514724	0.30088	0.241516	2.05153	0.86885	0.908364	0.0383485	0.264621	0.0299913	0.142
Fos	D1	D2	D3	A1	A2	A3	A4
NC	5.5465	6.68405	6.4539	8.6176	8.61515	8.6343		-6.22815	-8.62235	0.361727	0.000108603	0.0816251		1.05613e-08	0.190228
Cdx2 -/-	9.48295	9.24435	9.0058	10.2401	9.80525	10.0257		-9.24437	-10.0237	0.056918	0.0472659	0.0816251		0.00387404	0.582649	3.18607e-10	0.123603	1.41385e-05	0.378583
Braf V600E	8.4751	8.47595	8.38165	10.8295	10.9325	11.0801	11.1047	-8.44423	-10.9867	0.00293769	0.0167626	0.0816251		1.57729e-09	0.17165	3.26653e-08	0.215225	4.71833e-09	0.194206	0.00319338	1.74126	0.000380164	0.512982
Cdx2 -/- Braf V600E	7.9073	8.47155	7.6914	10.1242	10.3125	9.92555		-8.02342	-10.1207	0.162271	0.0374413	0.0816251		7.19e-08	0.233692	6.16065e-07	0.288118	6.30256e-06	0.35395	6.73614e-05	2.331	0.682538	0.934932	0.0889866	1.33869	0.000992748	1.82254	8.4619e-09	10.8305	1.7875e-06	4.81412	0.000136542	3.0629	0.648442	0.902342	0.380734	1.22849	0.0208213	0.444495
Anxa10	D1	D2	D3	A1	A2	A3	A4
NC	9.4046	8.67465	8.93645	11.4658	11.3753	11.7854		-9.00523	-11.5422	0.136755	0.0464194	0.241417		7.63076e-06	0.172309
Cdx2 -/-	14.4245	12.845	13.3896	13.7797	14.0991	14.1894		-13.553	-14.0228	0.643738	0.0463336	0.241417		0.257798	0.722098	2.39132e-09	0.0427539	1.00154e-05	0.17917
Braf V600E	10.4962	11.2023	10.6362	14.9819	15.178	14.5678	14.7086	-10.7782	-14.8591	0.139796	0.0747315	0.241417		4.4695e-09	0.0590928	0.000375246	0.292606	9.15368e-08	0.100349	2.49264e-06	6.84397	0.0396293	0.560075
Cdx2 -/- Braf V600E	11.2434	12.1529	12.5485	14.2067	15.2289	15.5263		-11.9816	-14.9873	0.447829	0.479075	0.241417		8.80906e-07	0.124506	1.00317e-06	0.127069	1.37279e-07	0.0918167	0.00110961	2.9721	0.0278905	0.512456	0.0080627	0.434266	0.736838	0.914978	1.76545e-05	10.1573	0.000503847	5.10676	0.00200948	4.19073	0.012035	0.342947	0.4201	0.722574	0.226036	0.502766

## Sheet: graph
Carefully copy the next 5 rows in to make the graphs.
Anxa10	D1	D2	D3	A1	A2	A3	A4
NC	9.4046	8.67465	8.93645	11.4658	11.3753	11.7854		-9.00523	-11.5422	0.136755	0.0464194	0.241417		7.63076e-06	0.172309
Cdx2 -/-	14.4245	12.845	13.3896	13.7797	14.0991	14.1894		-13.553	-14.0228	0.643738	0.0463336	0.241417		0.257798	0.722098	2.39132e-09	0.0427539	1.00154e-05	0.17917
Braf V600E	10.4962	11.2023	10.6362	14.9819	15.178	14.5678	14.7086	-10.7782	-14.8591	0.139796	0.0747315	0.241417		4.4695e-09	0.0590928	0.000375246	0.292606	9.15368e-08	0.100349	2.49264e-06	6.84397	0.0396293	0.560075
Cdx2 -/- Braf V600E	11.2434	12.1529	12.5485	14.2067	15.2289	15.5263		-11.9816	-14.9873	0.447829	0.479075	0.241417		8.80906e-07	0.124506	1.00317e-06	0.127069	1.37279e-07	0.0918167	0.00110961	2.9721	0.0278905	0.512456	0.0080627	0.434266	0.736838	0.914978	1.76545e-05	10.1573	0.000503847	5.10676	0.00200948	4.19073	0.012035	0.342947	0.4201	0.722574	0.226036	0.502766
				1	1	1	2	2	2	3	3	3	4	4	4	5	5	5	6	6	6	6	7	7	7	8	8	8
min	max			NC_D1	NC_D2	NC_D3	NC_A1	NC_A2	NC_A3	Cdx2_D1	Cdx2_D2	Cdx2_D3	Cdx2_A1	Cdx2_A2	Cdx2_A3	Braf_D1	Braf_D2	Braf_D3	Braf_A1	Braf_A2	Braf_A3	Braf_A4	C+B_D1	C+B_D2	C+B_D3	C+B_A1	C+B_A2	C+B_A3
-15.5263	-8.67465	As is		-9.4046	-8.67465	-8.93645	-11.4658	-11.3753	-11.7854	-14.4245	-12.845	-13.3896	-13.7797	-14.0991	-14.1894	-10.4962	-11.2023	-10.6362	-14.9819	-15.178	-14.5678	-14.7086	-11.2434	-12.1529	-12.5485	-14.2067	-15.2289	-15.5263
-6.52102	0.330583	Center NC, DMSO		-0.399367	0.330583	0.0687833	-2.46057	-2.37007	-2.78017	-5.41927	-3.83977	-4.38437	-4.77452	-5.09387	-5.18422	-1.49092	-2.19707	-1.63092	-5.97662	-6.17272	-5.56262	-5.70342	-2.23812	-3.14762	-3.54322	-5.20147	-6.22362	-6.52102
															Below, copies where I customize the Y-axis ranges.

## Sheet: Table
Gene	Pairwise contrast P-values														Interaction	Ratio of ratios	Interaction	Ratio of ratios
	Cdx2KO vs. Cont, DMSO	BrafVE vs. Cont, DMSO	Cdx2KO+BrafVE vs. Cont, DMSO	Cdx2KO+BrafVE vs. Cdx2KO, DMSO	Cdx2KO+BrafVE vs. BrafVE, DMSO	Cdx2KO vs. Cont, AZD6244	BrafVE vs. Cont, AZD6244	Cdx2KO+BrafVE vs. Cont, AZD6244	Cdx2KO+BrafVE vs. Cdx2KO, AZD6244	Cdx2KO+BrafVE vs. BrafVE, AZD6244	AZD6244 vs. DMSO, Cont	AZD6244 vs. DMSO, Cdx2KO	AZD6244 vs. DMSO, BrafVE	AZD6244 vs. DMSO, Cdx2KO +BrafVE	(Cdx2KO+BrafVE - BrafVE) - (Cdx2KO - Cont), DMSO	(Cdx2KO+BrafVE / BrafVE) / (Cdx2KO/Cont), DMSO	(Cdx2KO+BrafVE - BrafVE) - (Cdx2KO - Cont), AZD6244	(Cdx2KO+BrafVE / BrafVE) / (Cdx2KO/Cont), AZD6244	3-way interaction, P-value
Npy	0.544852	0.627642	9.65903e-06	2.98303e-06	2.56401e-05	0.690408	0.226135	0.000111932	0.000263526	4.58724e-06	0.0966913	0.472224	0.0019238	0.0085804	0.000334522	308.541	0.000593722	184.696	0.777063
Tmprss11e	0.579844	0.0429515	8.266e-05	0.000271446	1.19074e-06	0.00528058	0.110808	0.184504	0.0873846	0.00570803	2.41658e-06	0.000484119	3.36163e-06	5.80853e-09	0.000174446	4.62312	0.862738	0.947006	0.00243333
Dusp6	0.0718426	0.0217716	4.06919e-05	0.00240951	0.00888467	0.572604	2.86652e-05	0.000390947	0.00135541	0.356216	2.62478e-10	5.67482e-11	3.54511e-09	7.59963e-11	0.474532	1.14876	0.300435	0.821925	0.221768
Ivl	0.436893	0.233188	0.00102164	0.000184902	0.0145834	0.194572	0.0528138	0.373042	0.66863	0.285209	0.521951	0.921831	0.0150465	0.000580847	0.0236313	4.24553	0.0999228	2.6645	0.572586
Tff1	6.49731e-14	0.00749777	1.65403e-13	0.241207	2.17296e-12	2.70767e-13	0.000297778	7.3262e-10	4.5445e-07	1.4136e-07	0.00620786	0.213543	0.000243537	5.14187e-05	0.00799054	0.389852	9.11246e-08	0.0682412	0.000942761
Gkn2	0.00110586	0.626353	4.80563e-07	0.00110129	1.14759e-06	0.859686	0.43117	0.028109	0.0402387	0.00361748	0.0183862	0.27352	0.16491	0.011518	0.0269176	3.68948	0.0442313	3.1083	0.822034
Otop3	1.15888e-06	0.322749	3.01405e-07	0.449035	5.76506e-08	6.50596e-08	0.199756	0.000124831	0.00072065	4.39551e-06	0.973952	0.110636	0.782242	0.00515486	0.22186	2.11888	0.0514724	0.30088	0.0299913
Fos	3.18607e-10	3.26653e-08	6.16065e-07	6.73614e-05	0.0889866	1.41385e-05	4.71833e-09	6.30256e-06	0.682538	0.000992748	1.05613e-08	0.00387404	1.57729e-09	7.19e-08	8.4619e-09	10.8305	1.7875e-06	4.81412	0.0208213
Anxa10	2.39132e-09	0.000375246	1.00317e-06	0.00110961	0.0080627	1.00154e-05	9.15368e-08	1.37279e-07	0.0278905	0.736838	7.63076e-06	0.257798	4.4695e-09	8.80906e-07	1.76545e-05	10.1573	0.000503847	5.10676	0.226036
