# Supplementary material for: BRAFV600E cooperates with CDX2 inactivation to promote serrated colorectal tumorigenesis
Source: eLife journal article supplement (doi:10.7554/elife.20331), 2017-01-10
Supplement: supp [file elife-20331-supp-v1.zip › elife_poa_e20331_Supplementary_File_1.docx]

| **Supplementary file 1. Antibodies for immunohistochemistry study**  **For Mouse tissue** | | | | | | | | | | | |
| --- | --- | --- | --- | --- | --- | --- | --- | --- | --- | --- | --- |
| **Antibody** | **Animal Species** | **Dilution** | | **Source** | |  | |  | |  | |
| CDX2 | mouse | | 50x | | BioGenex | |  | |  | |  | |
| -catenin | mouse | | 800x | | BD Biosciences | | | |  | |  | |
| BrdU | mouse | | 500x | | BD Biosciences | | | |  | |  | |
| p53 | rabbit | | 2000x | | Vector Laboratories Inc. | | | |  | |  | |
| MUC5AC | mouse | | 100x | | Thermo Fisher Scientific | | | |  | |  | |
| PDX1 | mouse | | 100x | | Developmental Studies Hybridoma Bank | | | | | | | |
| ANXA10 | rabbit | | 300x | | Novus | |  | |  | |  | |
| Phospho-EGFR  (Tyr845) | rabbit | | 100x | | Thermo Fisher Scientific | | | | | | | |
| Phospho-ERK | rabbit | | 100x | | Cell Signaling Technology | | | | | | | |
|  |  |  | |  | |  | |  | |  | |
| **For Human tissue** | |  | |  | |  | |  | |  | |
| **Antibody** | **Animal Species** | **Dilution** | | **Source** | |  | |  | |  | |
| CDX2 | mouse | 50x | | BioGenex | |  | |  | |  | |
| -catenin | mouse | 800x | | BD Biosciences | | | |  | |  | |
| MLH1 | mouse | Diluted | | Dako, Carpinteria | | | |  | |  | |
| MSH2 | mouse | 20x | | Dako, Carpinteria | | | |  | |  | |
| p16 | mouse | 50x | | Becton Dickinson Co | | | |  | |  | |
| p53 | mouse | 50x | | NovoCastra | | | |  | |  | |
| MUC5AC | mouse | 50x | | NovoCastra | | | |  | |  | |
| MUC6 | mouse | 50x | | NovoCastra | | | |  | |  | |
| ANXA10 | rabbit | 300x | | Novus | |  | |  | |  | |
| PDX1 | rabbit | 1000x | | Abcam | |  | |  | |  | |
