# Supplementary material for: BRAFV600E cooperates with CDX2 inactivation to promote serrated colorectal tumorigenesis
Source: eLife journal article supplement (doi:10.7554/elife.20331), 2017-01-10
Supplement: supp [file elife-20331-supp-v1.zip › elife_poa_e20331_Table_2_source_data_1.xlsx]

## Sheet: Cdx2Braf_Int_p01F13_MS0_dn
634 down genes for Braf by Cdx2 interaction, p<.01, and ratio-of-ratios >1.3								Results (p-values) from 100 permuted data-sets in which the gene labels of our selected genes were randomly permuted.
15735 human homologs			p<.00001	2				0	0	0	0	0	0	0	0	0	0	0	0	0	0	0	0	0	0	0	0	0	0	0	0	0	0	0	0	0	0	0	0	0	0	0	0	0	0	0	0	0	0
50 Hallmark gene sets from MSigDB			p<.0001	5				0	0	0	0	0	0	0	0	0	0	0	0	0	0	0	0	0	0	0	0	0	0	0	0	0	0	0	0	0	0	0	0	0	0	0	0	0	0	0	0	0	0
http://www.broadinstitute.org/gsea/msigdb/index.jsp			p<.001	9				0	0	0	0	0	0	0	0	0	0	0	0	0	0	0	0	0	0	0	0	0	0	0	0	0	1	0	0	0	0	0	0	0	0	0	0	0	0	0	0	0	0
			p<.005	11				0	0	0	1	1	0	0	0	0	0	0	0	0	0	0	0	0	0	1	0	0	0	0	0	1	1	0	0	0	0	0	0	0	0	0	0	0	0	0	0	0	0
			p<.01	13				0	0	1	1	1	0	1	0	0	0	0	0	0	0	0	0	0	0	1	0	0	0	0	0	2	1	0	0	0	0	0	0	0	0	0	0	0	0	0	0	0	0
			p<.05	17				0	3	4	2	3	1	1	0	1	1	3	4	0	1	1	0	4	1	1	1	1	3	0	3	4	4	1	0	1	1	0	2	3	1	1	3	0	1	3	1	5	0
Path_ID	Title	number of genes on list	number of those genes we selected	actual pvalue (One-sided Fisher Exact test)	number of categories that good in our data	estimated FDR, based on perms (Q-value)	observed/expected	iteration0	iteration1	iteration2	iteration3	iteration4	iteration5	iteration6	iteration7	iteration8	iteration9	iteration10	iteration11	iteration12	iteration13	iteration14	iteration15	iteration16	iteration17	iteration18	iteration19	iteration20	iteration21	iteration22	iteration23	iteration24	iteration25	iteration26	iteration27	iteration28	iteration29	iteration30	iteration31	iteration32	iteration33	iteration34	iteration35	iteration36	iteration37	iteration38	iteration39	iteration40	iteration41
8	HALLMARK_CHOLESTEROL_HOMEOSTASIS	72	17	2.692e-09	1	0	5.85995	0.559	0.06975	0.33	0.1642	0.559	0.33	0.559	0.7925	0.559	0.33	0.7925	0.33	0.06975	0.06975	0.7925	0.7925	0.559	0.7925	0.9486	0.9486	0.33	0.33	0.7925	0.7925	0.33	0.33	0.1642	0.33	0.06975	1	0.9486	0.7925	0.9486	1	1	0.33	0.1642	0.1642	0.33	0.559	0.33	1
0	HALLMARK_ADIPOGENESIS	191	22	9.272e-06	2	0	2.85869	0.7866	0.5065	0.5065	0.7866	0.654	0.7866	0.9845	0.3639	0.7866	0.654	0.9966	0.3639	0.5065	0.3639	0.1494	0.3639	0.654	0.9845	0.7866	0.2422	0.7866	0.9845	0.5065	0.3639	0.04563	0.2422	0.9523	0.2422	0.9523	0.5065	0.654	0.02269	0.2422	0.888	0.7866	0.9845	0.7866	0.9845	0.08561	0.3639	0.2422	0.1494
49	HALLMARK_XENOBIOTIC_METABOLISM	194	22	1.191e-05	3	0	2.81448	0.8957	0.6699	0.5243	0.8957	0.6699	0.7987	0.5243	0.6699	0.09342	0.1608	0.1608	0.5243	0.09342	0.3811	0.8957	0.09342	0.8957	0.9561	0.257	0.6699	0.997	0.6699	0.9561	0.7987	0.05054	0.9561	0.3811	0.5243	0.5243	0.997	0.7987	0.1608	0.257	0.8957	0.5243	0.01205	0.986	0.9561	0.6699	0.257	0.6699	0.3811
15	HALLMARK_ESTROGEN_RESPONSE_LATE	189	21	2.55e-05	4	0	2.75762	0.8827	0.4945	0.7782	0.7782	0.004153	0.1421	0.6432	0.3524	0.8827	0.2325	0.7782	0.4945	0.7782	0.7782	0.1421	0.2325	0.4945	0.3524	0.7782	0.6432	0.3524	0.7782	0.6432	0.2325	0.4945	0.7782	0.1421	0.8827	0.7782	0.3524	0.9495	0.2325	0.08063	0.9495	0.8827	0.2325	0.4945	0.6432	0.2325	0.4945	0.6432	0.4945
30	HALLMARK_MTORC1_SIGNALING	193	21	3.491e-05	5	0	2.70047	0.3754	0.6647	0.6647	0.252	0.9855	0.04887	0.7948	0.8932	0.9548	0.5184	0.3754	0.5184	0.8932	0.8932	0.6647	0.1569	0.3754	0.3754	0.6647	0.5184	0.5184	0.7948	0.3754	0.7948	0.8932	0.9548	0.3754	0.5184	0.6647	0.7948	0.9855	0.9548	0.5184	0.5184	0.1569	0.7948	0.9548	0.7948	0.09077	0.3754	0.9548	0.5184
7	HALLMARK_BILE_ACID_METABOLISM	109	14	0.0001204	6	0	3.18771	0.645	0.2762	0.2762	0.2762	0.9376	0.449	0.0731	0.645	0.8207	0.2762	0.9376	0.01252	0.9376	0.449	0.645	0.449	0.03184	0.645	0.8207	0.645	0.9376	0.449	0.645	0.1505	0.449	0.645	0.645	0.449	0.2762	0.8207	1	0.645	0.01252	0.2762	0.8207	0.9376	0.2762	0.8207	0.1505	0.645	0.8207	0.449
16	HALLMARK_FATTY_ACID_METABOLISM	149	16	0.0003379	7	0.00428571	2.66509	0.559	0.559	0.07895	0.8558	0.07895	0.2529	0.9426	0.8558	0.559	0.7222	0.9845	0.3942	0.3942	0.8558	0.3942	0.7222	0.559	0.3942	0.559	0.3942	0.8558	0.9979	0.9845	0.559	0.7222	0.3942	0.559	0.559	0.8558	0.7222	0.07895	0.8558	0.3942	0.1478	0.7222	0.1478	0.559	0.1478	0.07895	0.7222	0.3942	0.8558
38	HALLMARK_PEROXISOME	101	12	0.0007422	8	0.005	2.94875	0.385	0.2222	0.007496	0.5849	0.385	0.2222	0.385	0.385	0.9184	0.9184	0.9845	0.02061	0.7788	0.385	0.5849	0.9184	0.05105	0.5849	0.385	0.1131	0.5849	0.9845	0.9184	0.385	0.7788	0.385	0.2222	0.5849	0.5849	0.9845	0.7788	0.7788	0.1131	0.385	0.9184	0.7788	0.05105	0.1131	0.2222	0.7788	0.385	0.9184
18	HALLMARK_GLYCOLYSIS	193	18	0.0008215	9	0.00444444	2.31469	0.09077	0.1569	0.8932	0.1569	0.6647	0.9548	0.9969	0.8932	0.3754	0.5184	0.7948	0.02455	0.6647	0.3754	0.3754	0.3754	0.9548	0.3754	0.9548	0.1569	0.6647	0.3754	0.5184	0.6647	0.252	0.3754	0.7948	0.6647	0.9855	0.252	0.8932	0.9548	0.252	0.6647	0.252	0.6647	0.5184	0.8932	0.3754	0.9548	0.9548	0.5184
14	HALLMARK_ESTROGEN_RESPONSE_EARLY	190	17	0.001781	10	0.005	2.22061	0.6486	0.3581	0.8854	0.5005	0.08309	0.1458	0.08309	0.3581	0.7825	0.8854	0.8854	0.7825	0.1458	0.08309	0.5005	0.2373	0.7825	0.9509	0.3581	0.5005	0.1458	0.8854	0.5005	0.3581	0.6486	0.7825	0.5005	0.984	0.3581	0.1458	0.7825	0.8854	0.2373	0.6486	0.9509	0.2373	0.5005	0.5005	0.08309	0.5005	0.04407	0.6486
26	HALLMARK_INTERFERON_GAMMA_RESPONSE	175	16	0.001924	11	0.00545455	2.26913	0.5619	0.5619	0.2743	0.9742	0.8387	0.9261	0.5619	0.8387	0.7125	0.4091	0.05095	0.5619	0.8387	0.5619	0.5619	0.2743	0.4091	0.05095	0.2743	0.09659	0.5619	0.1694	0.4091	0.09659	0.5619	0.09659	0.7125	0.5619	0.8387	0.9261	0.4091	0.5619	0.7125	0.1694	0.09659	0.1694	0.7125	0.1694	0.7125	0.09659	0.8387	0.09659
35	HALLMARK_OXIDATIVE_PHOSPHORYLATION	185	15	0.007984	12	0.02	2.01232	0.6209	0.7607	0.8713	0.4704	0.2136	0.9958	0.4704	0.9436	0.4704	0.7607	0.4704	0.2136	0.7607	0.7607	0.3297	0.3297	0.3297	0.8713	0.2136	0.07124	0.6209	0.4704	0.6209	0.3297	0.3297	0.4704	0.4704	0.3297	0.7607	0.2136	0.6209	0.3297	0.7607	0.6209	0.2136	0.2136	0.6209	1	0.9436	0.6209	0.8713	0.1281
41	HALLMARK_REACTIVE_OXIGEN_SPECIES_PATHWAY	46	6	0.009934	13	0.0207692	3.23721	0.8496	1	0.8496	0.2828	0.03678	0.5583	1	0.8496	0.8496	0.8496	1	0.1132	1	0.2828	0.5583	0.5583	1	0.5583	0.5583	0.5583	0.1132	0.8496	1	0.5583	1	1	0.8496	0.8496	1	1	0.2828	1	0.8496	0.5583	1	0.5583	0.5583	0.8496	0.8496	0.2828	0.8496	0.5583
12	HALLMARK_E2F_TARGETS	195	15	0.01259	14	0.0257143	1.90912	0.8027	0.5302	0.3869	0.9573	0.09612	0.8027	0.9997	0.6751	0.6751	0.9573	0.3869	0.262	0.8027	0.8981	0.8027	0.9573	0.8027	0.09612	0.1646	0.1646	0.8027	0.8027	0.8027	0.8981	0.5302	0.5302	0.8981	0.8027	0.8027	0.9573	0.8981	0.3869	0.9573	0.09612	0.09612	0.09612	0.6751	0.8981	0.3869	0.3869	0.6751	0.5302
2	HALLMARK_ANDROGEN_RESPONSE	94	9	0.01342	15	0.0293333	2.37625	0.7359	0.03573	0.8971	0.7359	0.5277	0.8971	0.5277	0.8971	0.5277	0.3287	0.5277	0.08487	0.7359	0.9793	0.5277	0.9793	0.3287	0.1783	0.3287	0.9793	0.8971	0.5277	0.1783	0.5277	0.8971	0.08487	0.3287	0.7359	0.3287	0.7359	0.5277	0.1783	0.1783	0.8971	0.8971	0.5277	0.3287	0.7359	0.1783	0.8971	0.1783	1
25	HALLMARK_INTERFERON_ALPHA_RESPONSE	82	8	0.0173	16	0.034375	2.42133	0.6474	0.8483	0.6474	0.966	0.6474	0.8483	0.6474	0.966	0.6474	0.6474	0.0173	0.4221	0.6474	0.8483	0.4221	0.8483	0.6474	0.4221	0.6474	0.2351	0.6474	0.966	0.8483	0.4221	0.2351	0.4221	0.6474	0.8483	0.1128	0.8483	0.966	0.8483	0.8483	0.4221	0.2351	0.2351	0.966	0.1128	0.8483	0.1128	0.4221	0.8483
37	HALLMARK_PANCREAS_BETA_CELLS	38	5	0.01747	17	0.0347059	3.26561	0.4563	0.7908	0.4563	1	0.7908	0.7908	0.7908	0.1963	0.7908	1	1	0.4563	0.7908	0.4563	0.7908	0.4563	0.7908	0.7908	0.7908	0.4563	0.7908	0.7908	0.4563	0.4563	0.1963	0.1963	0.1963	0.1963	1	0.4563	0.4563	1	1	0.1963	0.1963	0.4563	1	0.4563	0.7908	0.7908	0.7908	0.7908
32	HALLMARK_MYC_TARGETS_V2	55	5	0.06987	18	0.127222	2.25624	0.3828	0.6559	0.1803	0.6559	0.8963	0.1803	0.6559	0.8963	0.02273	1	0.3828	0.8963	1	0.8963	0.3828	1	0.6559	1	0.6559	0.6559	0.1803	1	0.1803	0.6559	0.8963	0.8963	0.3828	0.6559	0.6559	0.6559	0.6559	0.3828	1	0.6559	0.1803	0.6559	0.3828	0.8963	0.6559	0.3828	0.6559	0.6559
5	HALLMARK_APICAL_SURFACE	40	4	0.07617	19	0.134211	2.48186	0.8074	0.8074	1	0.8074	1	0.2174	1	0.8074	0.8074	0.8074	0.8074	0.2174	0.4831	1	0.8074	0.2174	0.2174	1	0.07617	0.8074	0.8074	0.4831	0.8074	0.4831	0.8074	0.07617	0.8074	1	0.2174	0.4831	0.8074	0.4831	0.8074	0.07617	0.8074	0.8074	0.4831	0.2174	0.8074	0.2174	0.4831	0.8074
20	HALLMARK_HEME_METABOLISM	182	11	0.1181	20	0.2105	1.50003	0.9388	0.1999	0.8622	0.4521	0.4521	0.1999	0.1999	0.1999	0.1181	0.3128	0.6036	0.1181	0.3128	0.01559	0.3128	0.06468	0.4521	0.9953	0.7469	0.1181	0.4521	0.01559	0.6036	0.9388	0.002863	0.6036	0.7469	0.4521	0.3128	0.4521	0.4521	0.3128	0.6036	0.7469	0.3128	0.7469	0.6036	0.9953	0.9388	0.7469	0.3128	0.7469
17	HALLMARK_G2M_CHECKPOINT	186	11	0.1315	21	0.21619	1.46777	0.7652	0.6265	0.9452	0.9818	0.6265	0.7652	0.7652	0.6265	0.4764	0.8742	0.9818	0.9818	0.8742	0.7652	0.9452	0.996	0.9995	0.7652	0.3353	0.8742	0.7652	0.6265	0.4764	0.9452	0.8742	0.7652	0.7652	0.6265	0.3353	0.2183	0.6265	0.2183	0.2183	0.6265	0.4764	0.7652	0.7652	0.7652	0.4764	0.7652	0.4764	0.6265
46	HALLMARK_UV_RESPONSE_DN	141	8	0.2091	22	0.330455	1.40815	0.9794	0.9272	0.1163	0.5047	0.6762	0.3413	0.5047	0.825	0.05894	0.2091	0.9272	0.3413	0.6762	0.6762	0.5047	0.6762	0.6762	0.5047	0.3413	0.2091	0.5047	0.6762	0.2091	0.3413	0.5047	0.5047	0.6762	0.6762	0.5047	0.02734	0.825	0.6762	0.2091	0.825	0.5047	0.05894	0.05894	0.6762	0.6762	0.1163	0.825	0.825
47	HALLMARK_UV_RESPONSE_UP	143	8	0.2197	23	0.345652	1.38845	0.6882	0.2197	0.0636	0.2197	0.2197	0.5185	0.6882	0.2197	0.5185	0.1238	0.6882	0.2197	0.8331	0.8331	0.02991	0.6882	0.9808	0.6882	0.5185	0.02991	0.1238	0.2197	0.6882	0.01294	0.5185	0.3545	0.2197	0.8331	0.3545	0.9808	0.1238	0.8331	0.0636	0.8331	0.1238	0.5185	0.3545	0.5185	0.8331	0.3545	0.1238	0.6882
4	HALLMARK_APICAL_JUNCTION	191	10	0.2422	24	0.377083	1.2994	0.5065	0.888	0.7866	0.654	0.5065	0.654	0.5065	0.3639	0.3639	0.9845	0.654	0.9845	0.5065	0.08561	0.654	0.888	0.2422	0.2422	0.5065	0.7866	0.3639	0.1494	0.7866	0.3639	0.2422	0.654	0.02269	0.654	0.888	0.7866	0.5065	0.888	0.08561	0.7866	0.3639	0.9523	0.2422	0.2422	0.3639	0.1494	0.04563	0.888
9	HALLMARK_COAGULATION	126	7	0.2457	25	0.3692	1.37881	0.2457	0.2457	0.3978	0.9652	0.7525	0.3978	0.7525	0.7525	0.8877	0.5775	0.9652	0.5775	0.5775	0.9652	0.7525	0.7525	0.06834	0.3978	0.5775	0.9652	0.3978	0.7525	0.9652	0.06834	0.7525	0.5775	0.1364	0.1364	0.7525	0.5775	0.5775	0.1364	0.5775	0.1364	0.2457	0.2457	0.5775	0.9945	0.8877	0.3978	0.9652	0.8877
34	HALLMARK_NOTCH_SIGNALING	30	2	0.3421	26	0.475385	1.65457	0.7092	1	0.7092	1	0.7092	0.7092	0.7092	0.7092	1	1	0.03116	1	0.3421	0.7092	1	0.7092	1	0.3421	0.7092	0.7092	1	0.1186	1	1	0.1186	0.1186	1	1	0.7092	1	0.1186	0.7092	0.3421	0.3421	0.7092	0.7092	0.7092	0.3421	0.7092	1	0.7092	0.1186
44	HALLMARK_TNFA_SIGNALING_VIA_NFKB	189	9	0.3524	27	0.482222	1.18184	0.9495	0.4945	0.7782	0.6432	0.6432	0.8827	0.8827	0.4945	0.1421	0.9495	0.4945	0.2325	0.3524	0.3524	0.7782	0.3524	0.6432	0.4945	0.9495	0.4945	0.7782	0.3524	0.4945	0.2325	0.04254	0.04254	0.9495	0.6432	0.8827	0.9835	0.4945	0.2325	0.3524	0.6432	0.2325	0.2325	0.8827	0.3524	0.04254	0.4945	0.04254	0.08063
33	HALLMARK_MYOGENESIS	192	9	0.3696	28	0.501786	1.16337	0.2471	0.6594	0.3696	0.1532	0.985	0.7907	0.1532	0.6594	0.1532	0.3696	0.6594	0.7907	0.9996	0.6594	0.5124	0.1532	0.5124	0.04723	0.9536	0.08816	0.5124	0.08816	0.8906	0.8906	0.5124	0.8906	0.5124	0.8906	0.5124	0.6594	0.7907	0.7907	0.7907	0.5124	0.6594	0.9536	0.8906	0.5124	0.2471	0.5124	0.08816	0.8906
36	HALLMARK_P53_PATHWAY	192	9	0.3696	29	0.484483	1.16337	0.9536	0.3696	0.01103	0.8906	0.2471	0.3696	0.3696	0.6594	0.2471	0.1532	0.2471	0.8906	0.3696	0.9536	0.08816	0.6594	0.3696	0.6594	0.9536	0.5124	0.3696	0.08816	0.5124	0.6594	0.8906	0.7907	0.7907	0.3696	0.08816	0.5124	0.6594	0.3696	0.5124	0.9536	0.5124	0.3696	0.6594	0.2471	0.6594	0.6594	0.1532	0.7907
21	HALLMARK_HYPOXIA	189	8	0.4945	30	0.652333	1.05052	0.6432	0.6432	0.3524	0.2325	0.6432	0.9495	0.7782	0.7782	0.6432	0.4945	0.6432	0.04254	0.8827	0.08063	0.4945	0.1421	0.7782	0.6432	0.6432	0.2325	0.4945	0.4945	0.8827	0.6432	0.00963	0.08063	0.9495	0.3524	0.6432	0.6432	0.4945	0.6432	0.9964	0.8827	0.4945	0.8827	0.7782	0.3524	0.2325	0.7782	0.7782	0.6432
22	HALLMARK_IL2_STAT5_SIGNALING	193	8	0.5184	31	0.709677	1.02875	0.252	0.6647	0.3754	0.3754	0.7948	0.1569	0.6647	0.6647	0.3754	0.5184	0.8932	0.6647	0.9548	0.5184	0.5184	0.6647	0.04887	0.1569	0.5184	0.7948	0.7948	0.3754	0.6647	0.6647	0.252	0.7948	0.9548	0.6647	0.8932	0.9855	0.3754	0.09077	0.8932	0.5184	0.8932	0.8932	0.9855	0.5184	0.3754	0.9548	0.7948	0.3754
27	HALLMARK_KRAS_SIGNALING_DN	193	8	0.5184	32	0.6875	1.02875	0.5184	0.5184	0.8932	0.6647	0.9548	0.6647	0.005082	0.1569	0.3754	0.7948	0.252	0.8932	0.7948	0.5184	0.6647	0.7948	0.7948	0.7948	0.6647	0.6647	0.8932	0.6647	0.3754	0.09077	0.5184	0.7948	0.1569	0.8932	0.8932	0.7948	0.5184	0.3754	0.1569	0.252	0.6647	0.3754	0.252	0.7948	0.04887	0.3754	0.6647	0.5184
10	HALLMARK_COMPLEMENT	173	7	0.5497	33	0.694545	1.00422	0.9935	0.7021	0.0909	0.9726	0.8314	0.7021	0.8314	0.7021	0.7021	0.9221	0.3967	0.0909	0.8314	0.5497	0.9221	0.1611	0.1611	0.7021	0.9221	0.9935	0.04743	0.1611	0.8314	0.7021	0.2635	0.7021	0.3967	0.2635	0.2635	0.5497	0.1611	0.7021	0.1611	0.3967	0.0909	0.3967	0.0909	0.5497	0.7021	0.7021	0.8314	0.5497
39	HALLMARK_PI3K_AKT_MTOR_SIGNALING	99	4	0.569	34	0.705	1.00277	0.569	0.569	0.569	0.1045	0.9128	0.1045	0.7672	0.7672	0.1045	0.3689	0.2093	0.9128	0.9832	0.569	0.7672	0.7672	0.3689	0.3689	1	0.7672	0.9832	0.0463	0.569	0.1045	0.569	0.1045	0.9832	0.7672	0.7672	0.3689	0.569	0.569	0.01832	0.7672	0.9128	0.2093	0.1045	0.7672	0.3689	0.9128	0.9128	0.2093
43	HALLMARK_TGF_BETA_SIGNALING	52	2	0.6254	35	0.731429	0.954562	0.6254	0.6254	0.3496	0.01765	0.3496	0.8826	0.8826	0.6254	0.3496	0.3496	0.8826	0.3496	0.8826	0.6254	0.3496	0.05747	0.8826	0.6254	1	0.3496	0.8826	1	0.05747	0.3496	0.6254	0.000206	0.8826	0.3496	1	1	0.6254	0.8826	0.6254	0.8826	0.6254	0.05747	1	0.6254	0.8826	0.6254	0.3496	0.6254
23	HALLMARK_IL6_JAK_STAT3_SIGNALING	81	3	0.6392	36	0.735278	0.919208	0.2277	0.2277	0.6392	0.6392	0.6392	0.8434	0.8434	0.6392	0.6392	0.6392	0.01616	0.4129	0.9646	0.6392	0.4129	0.4129	0.4129	0.4129	0.4129	0.4129	0.8434	0.9646	0.9646	0.8434	0.6392	0.2277	0.4129	0.8434	0.6392	0.4129	0.6392	0.4129	0.6392	1	0.8434	0.4129	0.6392	0.6392	0.4129	0.2277	0.4129	0.6392
28	HALLMARK_KRAS_SIGNALING_UP	192	7	0.6594	37	0.781892	0.904845	0.8906	0.04723	0.04723	0.7907	0.7907	0.2471	0.7907	0.9536	0.7907	0.04723	0.8906	0.6594	0.2471	0.985	0.5124	0.1532	0.08816	0.3696	0.5124	0.8906	0.7907	0.6594	0.8906	0.7907	0.985	0.7907	0.7907	0.1532	0.0236	0.9536	0.3696	0.7907	0.985	0.5124	0.8906	0.1532	0.6594	0.6594	0.04723	0.5124	0.3696	0.5124
29	HALLMARK_MITOTIC_SPINDLE	193	7	0.6647	38	0.782895	0.900157	0.3754	0.5184	0.3754	0.9548	0.5184	0.7948	0.8932	0.7948	0.8932	0.7948	0.6647	0.5184	0.252	0.7948	0.9969	0.7948	0.9548	0.6647	0.7948	0.6647	0.3754	0.6647	0.3754	0.3754	0.252	0.6647	0.8932	0.5184	0.3754	0.5184	0.7948	0.6647	0.8932	0.6647	0.04887	0.1569	0.7948	0.9969	0.6647	0.5184	0.3754	0.7948
42	HALLMARK_SPERMATOGENESIS	126	4	0.7525	39	0.829744	0.787892	0.1364	0.8877	0.8877	0.7525	0.01288	0.9652	0.9945	0.5775	0.5775	0.7525	0.7525	0.7525	0.8877	0.5775	0.8877	0.9945	0.03107	0.2457	0.5775	0.7525	0.8877	0.5775	0.3978	0.8877	0.3978	0.5775	0.7525	0.1364	0.8877	0.3978	0.8877	0.8877	0.03107	0.2457	0.5775	0.01288	0.5775	0.8877	0.9652	0.8877	0.7525	0.2457
3	HALLMARK_ANGIOGENESIS	36	1	0.7729	40	0.8465	0.689406	0.4288	1	0.7729	0.7729	1	0.4288	1	0.1758	0.7729	0.7729	0.1758	1	0.4288	0.7729	0.4288	0.4288	0.4288	0.7729	0.4288	0.1758	0.4288	1	0.1758	0.7729	0.1758	0.01401	0.7729	0.4288	1	0.7729	0.7729	0.4288	0.7729	0.4288	0.7729	0.1758	0.4288	0.4288	0.7729	0.7729	0.7729	1
31	HALLMARK_MYC_TARGETS_V1	179	5	0.8525	41	0.957561	0.693257	0.1865	0.1865	0.4337	0.7325	0.4337	0.586	0.586	0.2961	0.586	0.9337	0.586	0.8525	0.8525	0.1086	0.1086	0.7325	0.586	0.586	0.05853	0.8525	0.7325	0.9773	0.4337	0.9337	0.7325	0.9337	0.4337	0.9948	0.9773	0.2961	0.7325	0.586	0.7325	0.8525	0.4337	0.8525	0.4337	0.1865	0.9773	0.9337	0.2961	0.2961
6	HALLMARK_APOPTOSIS	155	4	0.8758	42	0.954524	0.64048	0.5978	0.8758	0.5978	0.434	0.2876	0.5978	0.7535	0.8758	0.8758	0.9521	0.2876	0.434	0.7535	0.9521	0.5978	0.174	0.8758	0.5978	0.7535	0.5978	0.0964	0.2876	0.9521	0.7535	0.0964	0.2876	0.8758	0.434	0.5978	0.7535	0.174	0.7535	0.434	0.04903	0.7535	0.8758	0.7535	0.5978	0.7535	0.04903	0.2876	0.434
11	HALLMARK_DNA_REPAIR	138	3	0.9205	43	1.00349	0.539535	0.1934	0.9771	0.6578	0.003818	0.6578	0.812	0.6578	0.6578	0.6578	0.6578	0.1055	0.6578	0.6578	0.9771	0.812	0.812	0.3217	0.812	0.812	0.3217	0.9205	0.4838	0.3217	0.6578	0.1055	0.812	0.9967	0.4838	0.4838	0.4838	0.9205	0.02379	0.1055	0.6578	0.4838	0.02379	0.6578	0.4838	0.4838	0.3217	0.3217	0.4838
13	HALLMARK_EPITHELIAL_MESENCHYMAL_TRANSITION	186	4	0.9452	44	1.005	0.533734	0.2183	0.3353	0.0185	0.6265	0.3353	0.9452	0.7652	0.8742	0.6265	0.3353	0.8742	0.4764	0.1315	0.2183	0.6265	0.1315	0.3353	0.3353	0.7652	0.2183	0.9818	0.6265	0.6265	0.7652	0.3353	0.1315	0.3353	0.996	0.3353	0.6265	0.1315	0.2183	0.3353	0.9818	0.7652	0.6265	0.8742	0.6265	0.6265	0.1315	0.4764	0.8742
40	HALLMARK_PROTEIN_SECRETION	91	1	0.9766	45	1.02511	0.272732	0.7156	0.03024	0.8865	0.9766	0.07417	0.1607	0.5021	0.7156	0.7156	0.07417	0.8865	0.1607	0.7156	0.8865	0.8865	0.5021	0.03024	0.8865	0.7156	0.9766	0.7156	0.1607	0.3048	0.5021	0.5021	0.9766	0.7156	0.5021	0.7156	0.8865	0.1607	0.5021	0.3048	0.1607	0.5021	0.7156	0.07417	0.7156	0.8865	0.8865	0.03024	1
24	HALLMARK_INFLAMMATORY_RESPONSE	189	3	0.9835	46	1.01457	0.393946	0.7782	0.3524	0.1421	0.3524	0.3524	0.8827	0.4945	0.8827	0.4945	0.4945	0.3524	0.1421	0.3524	0.9495	0.3524	0.08063	0.4945	0.4945	0.7782	0.3524	0.6432	0.04254	0.08063	0.3524	0.6432	0.4945	0.3524	0.3524	0.2325	0.9835	0.6432	0.4945	0.6432	0.6432	0.1421	0.1421	0.6432	0.4945	0.1421	0.3524	0.04254	0.1421
45	HALLMARK_UNFOLDED_PROTEIN_RESPONSE	107	1	0.9879	47	1.00362	0.23195	0.4331	0.6305	0.6305	0.2624	0.6305	0.6305	0.9879	0.6305	0.6305	0.1407	0.6305	0.4331	0.4331	0.9332	0.8109	0.2624	0.4331	0.4331	0.6305	0.4331	0.06712	0.8109	0.9332	0.4331	0.9332	0.02871	0.8109	0.2624	0.9879	0.9332	0.6305	0.8109	0.6305	0.8109	0.4331	0.06712	0.6305	0.02871	0.9332	0.9332	0.9332	0.2624
1	HALLMARK_ALLOGRAFT_REJECTION	181	2	0.9951	48	0.98625	0.274239	0.3072	0.3072	0.859	0.7422	0.4459	0.4459	0.4459	0.3072	0.5978	0.859	0.4459	0.4459	0.3072	0.9371	0.1954	0.06258	0.5978	0.4459	0.002709	0.1954	0.4459	0.3072	0.7422	0.4459	0.1149	0.1954	0.7422	0.1954	0.859	0.4459	0.1954	0.4459	0.9371	0.1954	0.5978	0.4459	0.4459	0.9371	0.859	0.1149	0.5978	0.1149
19	HALLMARK_HEDGEHOG_SIGNALING	36	0	1	49	1.02041	0	0.7729	1	0.7729	0.4288	0.4288	0.4288	0.7729	0.7729	0.7729	0.7729	0.05556	1	0.05556	0.7729	0.7729	1	0.4288	1	0.05556	0.7729	1	0.4288	0.7729	0.01401	0.7729	0.1758	1	1	1	1	1	1	0.4288	0.7729	0.7729	1	0.4288	0.7729	0.4288	0.4288	0.1758	0.7729
48	HALLMARK_WNT_BETA_CATENIN_SIGNALING	41	0	1	50	1	0	0.4962	0.8152	1	0.4962	0.8152	0.8152	0.2281	1	1	1	0.4962	0.4962	0.2281	1	0.4962	0.4962	1	1	0.4962	0.2281	0.8152	0.08185	0.8152	0.02366	0.8152	1	0.4962	0.2281	0.4962	0.4962	1	0.8152	0.4962	0.8152	0.8152	0.4962	1	1	1	0.4962	0.08185	0.4962
[truncated: 60 more columns]

## Sheet: dn_genes
Most significant paths, Individual gene entries show symbol, title, Entrez_gene_ID, fold_change (Symbol is for mouse, but gene ID is for human).
path_num	8	path_term	HALLMARK_CHOLESTEROL_HOMEOSTASIS	number_of_genes	72	number_hot_genes	17	Pvalue	2.692e-09
Anxa13	annexin A13	312	0.137783
Cyp51	cytochrome P450, family 51	1595	0.565574
Fdps	farnesyl diphosphate synthetase	2224	0.41132
Hmgcr	3-hydroxy-3-methylglutaryl-Coenzyme A reductase	3156	0.521121
Hmgcs1	3-hydroxy-3-methylglutaryl-Coenzyme A synthase 1	3157	0.399997
Idi1	isopentenyl-diphosphate delta isomerase	3422	0.51015
Ldlr	low density lipoprotein receptor	3949	0.402688
Lpl	lipoprotein lipase	4023	0.326875
Lss	lanosterol synthase	4047	0.274147
Mvd	mevalonate (diphospho) decarboxylase	4597	0.386391
Mvk	mevalonate kinase	4598	0.576948
Sqle	squalene epoxidase	6713	0.393769
Fads2	fatty acid desaturase 2	9415	0.402624
Tmem97	transmembrane protein 97	27346	0.413883
Nsdhl	NAD(P) dependent steroid dehydrogenase-like	50814	0.504375
Hsd17b7	hydroxysteroid (17-beta) dehydrogenase 7	51478	0.419493
Stard4	StAR-related lipid transfer (START) domain containing 4	134429	0.520985
path_num	0	path_term	HALLMARK_ADIPOGENESIS	number_of_genes	191	number_hot_genes	22	Pvalue	9.272e-06
Aco2	aconitase 2, mitochondrial	50	0.657198
Acox1	acyl-Coenzyme A oxidase 1, palmitoyl	51	0.663874
Ak2	adenylate kinase 2	204	0.666557
Cat	catalase	847	0.545899
Cpt2	carnitine palmitoyltransferase 2	1376	0.521958
Cyc1	cytochrome c-1	1537	0.516211
Gadd45a	growth arrest and DNA-damage-inducible 45 alpha	1647	0.350253
Hadh	hydroxyacyl-Coenzyme A dehydrogenase	3033	0.668832
Lpl	lipoprotein lipase	4023	0.326875
Mdh2	malate dehydrogenase 2, NAD (mitochondrial)	4191	0.724538
Me1	malic enzyme 1, NADP(+)-dependent, cytosolic	4199	0.516461
Mgst3	microsomal glutathione S-transferase 3	4259	0.512503
Tst	thiosulfate sulfurtransferase, mitochondrial	7263	0.442863
Uqcrc1	ubiquinol-cytochrome c reductase core protein 1	7384	0.581555
Dgat1	diacylglycerol O-acyltransferase 1	8694	0.414872
Lpcat3	lysophosphatidylcholine acyltransferase 3	10162	0.614194
Baz2a	bromodomain adjacent to zinc finger domain, 2A	11176	0.692207
Elovl6	ELOVL family member 6, elongation of long chain fatty acids (yeast)	79071	0.381658
Adipor2	adiponectin receptor 2	79602	0.498924
Coq5	coenzyme Q5 homolog, methyltransferase (yeast)	84274	0.545844
Fam73b	family with sequence similarity 73, member B	84895	0.622739
Chchd10	coiled-coil-helix-coiled-coil-helix domain containing 10	400916	0.403297
path_num	49	path_term	HALLMARK_XENOBIOTIC_METABOLISM	number_of_genes	194	number_hot_genes	22	Pvalue	1.191e-05
Aco2	aconitase 2, mitochondrial	50	0.657198
Acox1	acyl-Coenzyme A oxidase 1, palmitoyl	51	0.663874
Alas1	aminolevulinic acid synthase 1	211	0.470024
Aldh9a1	aldehyde dehydrogenase 9, subfamily A1	223	0.251487
Cat	catalase	847	0.545899
Entpd5	ectonucleoside triphosphate diphosphohydrolase 5	957	0.449971
Cdo1	cysteine dioxygenase 1, cytosolic	1036	0.234783
Cyp2c55	cytochrome P450, family 2, subfamily c, polypeptide 55	1562	0.186085
Ddc	dopa decarboxylase	1644	0.32538
Gart	phosphoribosylglycinamide formyltransferase	2618	0.580167
Gss	glutathione synthetase	2937	0.678203
Hnf4a	hepatic nuclear factor 4, alpha	3172	0.432629
Ccl25	chemokine (C-C motif) ligand 25	6370	0.266022
Shmt2	serine hydroxymethyltransferase 2 (mitochondrial)	6472	0.457459
Slc22a1	solute carrier family 22 (organic cation transporter), member 1	6580	0.444967
Acox2	acyl-Coenzyme A oxidase 2, branched chain	8309	0.2458
Abcc3	ATP-binding cassette, sub-family C (CFTR/MRP), member 3	8714	0.544046
Lpin2	lipin 2	9663	0.166736
Dak	dihydroxyacetone kinase 2 homolog (yeast)	26007	0.472417
Cyfip2	cytoplasmic FMR1 interacting protein 2	26999	0.385953
Tmem97	transmembrane protein 97	27346	0.413883
Cyp2s1	cytochrome P450, family 2, subfamily s, polypeptide 1	29785	0.422425
path_num	15	path_term	HALLMARK_ESTROGEN_RESPONSE_LATE	number_of_genes	189	number_hot_genes	21	Pvalue	2.55e-05
Ckb	creatine kinase, brain	1152	0.275899
Gale	galactose-4-epimerase, UDP	2582	0.472793
Itpk1	inositol 1,3,4-triphosphate 5/6 kinase	3705	0.235115
Krt19	keratin 19	3880	0.708447
Mapt	microtubule-associated protein tau	4137	0.496406
Myb	myeloblastosis oncogene	4602	0.261307
Mapk13	mitogen-activated protein kinase 13	5603	0.353006
Prlr	prolactin receptor	5618	0.410826
Slc1a4	solute carrier family 1 (glutamate/neutral amino acid transporter), member 4	6509	0.542983
Sult2b1	sulfotransferase family, cytosolic, 2B, member 1	6820	0.27539
Tff3	trefoil factor 3, intestinal	7033	0.329805
Tst	thiosulfate sulfurtransferase, mitochondrial	7263	0.442863
Xrcc3	X-ray repair complementing defective repair in Chinese hamster cells 3	7517	0.41128
Acox2	acyl-Coenzyme A oxidase 2, branched chain	8309	0.2458
Slc9a3r1	solute carrier family 9 (sodium/hydrogen exchanger), member 3 regulator 1	9368	0.463429
St6galnac2	ST6 (alpha-N-acetyl-neuraminyl-2,3-beta-galactosyl-1,3)-N-acetylgalactosaminide alpha-2,6-sialyltransferase 2	10610	0.438607
Plac1	placental specific protein 1	10761	0.648771
Slc27a2	solute carrier family 27 (fatty acid transporter), member 2	11001	0.322223
Il17rb	interleukin 17 receptor B	55540	0.29191
Hr	hairless	55806	0.526089
Cyp4f40	cytochrome P450, family 4, subfamily f, polypeptide 40	57834	0.419141
path_num	30	path_term	HALLMARK_MTORC1_SIGNALING	number_of_genes	193	number_hot_genes	21	Pvalue	3.491e-05
Cdc25a	cell division cycle 25A	993	0.601894
Cyp51	cytochrome P450, family 51	1595	0.565574
Hk2	hexokinase 2	3099	0.47528
Hmgcr	3-hydroxy-3-methylglutaryl-Coenzyme A reductase	3156	0.521121
Hmgcs1	3-hydroxy-3-methylglutaryl-Coenzyme A synthase 1	3157	0.399997
Idi1	isopentenyl-diphosphate delta isomerase	3422	0.51015
Insig1	insulin induced gene 1	3638	0.411019
Ldlr	low density lipoprotein receptor	3949	0.402688
Me1	malic enzyme 1, NADP(+)-dependent, cytosolic	4199	0.516461
Plk1	polo-like kinase 1	5347	0.490587
Shmt2	serine hydroxymethyltransferase 2 (mitochondrial)	6472	0.457459
Slc1a4	solute carrier family 1 (glutamate/neutral amino acid transporter), member 4	6509	0.542983
Sqle	squalene epoxidase	6713	0.393769
Slc9a3r1	solute carrier family 9 (sodium/hydrogen exchanger), member 3 regulator 1	9368	0.463429
Fads2	fatty acid desaturase 2	9415	0.402624
Tomm40	translocase of outer mitochondrial membrane 40 homolog (yeast)	10452	0.532669
Tmem97	transmembrane protein 97	27346	0.413883
Elovl6	ELOVL family member 6, elongation of long chain fatty acids (yeast)	79071	0.381658
Adipor2	adiponectin receptor 2	79602	0.498924
Egln3	egl-9 family hypoxia-inducible factor 3	112399	0.271201
Stard4	StAR-related lipid transfer (START) domain containing 4	134429	0.520985
path_num	7	path_term	HALLMARK_BILE_ACID_METABOLISM	number_of_genes	109	number_hot_genes	14	Pvalue	0.0001204
Aldh9a1	aldehyde dehydrogenase 9, subfamily A1	223	0.251487
Cat	catalase	847	0.545899
Idi1	isopentenyl-diphosphate delta isomerase	3422	0.51015
Slc22a18	solute carrier family 22 (organic cation transporter), member 18	5002	0.569088
Sult2b1	sulfotransferase family, cytosolic, 2B, member 1	6820	0.27539
Ttr	transthyretin	7276	0.165044
Hsd17b6	hydroxysteroid (17-beta) dehydrogenase 6	8630	0.12618
Nr1i2	nuclear receptor subfamily 1, group I, member 2	8856	0.238778
Fads2	fatty acid desaturase 2	9415	0.402624
Optn	optineurin	10133	0.455441
Slc27a2	solute carrier family 27 (fatty acid transporter), member 2	11001	0.322223
Pipox	pipecolic acid oxidase	51268	0.107567
Acsl5	acyl-CoA synthetase long-chain family member 5	51703	0.615893
Abcg8	ATP-binding cassette, sub-family G (WHITE), member 8	64241	0.164324
path_num	16	path_term	HALLMARK_FATTY_ACID_METABOLISM	number_of_genes	149	number_hot_genes	16	Pvalue	0.0003379
Aco2	aconitase 2, mitochondrial	50	0.657198
Acox1	acyl-Coenzyme A oxidase 1, palmitoyl	51	0.663874
Aldh9a1	aldehyde dehydrogenase 9, subfamily A1	223	0.251487
Car4	carbonic anhydrase 4	762	0.057328
Cpt2	carnitine palmitoyltransferase 2	1376	0.521958
Ehhadh	enoyl-Coenzyme A, hydratase/3-hydroxyacyl Coenzyme A dehydrogenase	1962	0.56806
Gpd1	glycerol-3-phosphate dehydrogenase 1 (soluble)	2819	0.289919
Hadh	hydroxyacyl-Coenzyme A dehydrogenase	3033	0.668832
Hmgcs1	3-hydroxy-3-methylglutaryl-Coenzyme A synthase 1	3157	0.399997
Idi1	isopentenyl-diphosphate delta isomerase	3422	0.51015
Mdh2	malate dehydrogenase 2, NAD (mitochondrial)	4191	0.724538
Me1	malic enzyme 1, NADP(+)-dependent, cytosolic	4199	0.516461
Nsdhl	NAD(P) dependent steroid dehydrogenase-like	50814	0.504375
Hsd17b7	hydroxysteroid (17-beta) dehydrogenase 7	51478	0.419493
Acsl5	acyl-CoA synthetase long-chain family member 5	51703	0.615893
Adipor2	adiponectin receptor 2	79602	0.498924
path_num	38	path_term	HALLMARK_PEROXISOME	number_of_genes	101	number_hot_genes	12	Pvalue	0.0007422
Acox1	acyl-Coenzyme A oxidase 1, palmitoyl	51	0.663874
Aldh9a1	aldehyde dehydrogenase 9, subfamily A1	223	0.251487
Cat	catalase	847	0.545899
Ehhadh	enoyl-Coenzyme A, hydratase/3-hydroxyacyl Coenzyme A dehydrogenase	1962	0.56806
Fdps	farnesyl diphosphate synthetase	2224	0.41132
Idi1	isopentenyl-diphosphate delta isomerase	3422	0.51015
Abcb1a	ATP-binding cassette, sub-family B (MDR/TAP), member 1A	5243	0.290831
Sult2b1	sulfotransferase family, cytosolic, 2B, member 1	6820	0.27539
Ttr	transthyretin	7276	0.165044
Nr1i2	nuclear receptor subfamily 1, group I, member 2	8856	0.238778
Slc27a2	solute carrier family 27 (fatty acid transporter), member 2	11001	0.322223
Acsl5	acyl-CoA synthetase long-chain family member 5	51703	0.615893
path_num	18	path_term	HALLMARK_GLYCOLYSIS	number_of_genes	193	number_hot_genes	18	Pvalue	0.0008215
Aldh9a1	aldehyde dehydrogenase 9, subfamily A1	223	0.251487
Aldob	aldolase B, fructose-bisphosphate	229	0.124697
Cldn3	claudin 3	1365	0.358749
Dsc2	desmocollin 2	1824	0.648347
Gale	galactose-4-epimerase, UDP	2582	0.472793
Got2	glutamate oxaloacetate transaminase 2, mitochondrial	2806	0.610774
Hk2	hexokinase 2	3099	0.47528
Mdh2	malate dehydrogenase 2, NAD (mitochondrial)	4191	0.724538
Me1	malic enzyme 1, NADP(+)-dependent, cytosolic	4199	0.516461
Mxi1	Max interacting protein 1	4601	0.491995
Pfkp	phosphofructokinase, platelet	5214	0.371087
Pmm2	phosphomannomutase 2	5373	0.703866
Tff3	trefoil factor 3, intestinal	7033	0.329805
Txn1	thioredoxin 1	7295	0.578733
Cacna1h	calcium channel, voltage-dependent, T type, alpha 1H subunit	8912	0.492077
Rbck1	RanBP-type and C3HC4-type zinc finger containing 1	10616	0.764951
Nsdhl	NAD(P) dependent steroid dehydrogenase-like	50814	0.504375
Egln3	egl-9 family hypoxia-inducible factor 3	112399	0.271201
path_num	14	path_term	HALLMARK_ESTROGEN_RESPONSE_EARLY	number_of_genes	190	number_hot_genes	17	Pvalue	0.001781
Abat	4-aminobutyrate aminotransferase	18	0.345874
Cldn7	claudin 7	1366	0.70954
Itpk1	inositol 1,3,4-triphosphate 5/6 kinase	3705	0.235115
Krt8	keratin 8	3856	0.688354
Krt19	keratin 19	3880	0.708447
Lad1	ladinin	3898	0.613771
Mapt	microtubule-associated protein tau	4137	0.496406
Myb	myeloblastosis oncogene	4602	0.261307
Slc1a4	solute carrier family 1 (glutamate/neutral amino acid transporter), member 4	6509	0.542983
Sult2b1	sulfotransferase family, cytosolic, 2B, member 1	6820	0.27539
Tff3	trefoil factor 3, intestinal	7033	0.329805
Slc9a3r1	solute carrier family 9 (sodium/hydrogen exchanger), member 3 regulator 1	9368	0.463429
Slc27a2	solute carrier family 27 (fatty acid transporter), member 2	11001	0.322223
Sec14l2	SEC14-like 2 (S. cerevisiae)	23541	0.348718
Il17rb	interleukin 17 receptor B	55540	0.29191
Mreg	melanoregulin	55686	0.235664
Hr	hairless	55806	0.526089
path_num	26	path_term	HALLMARK_INTERFERON_GAMMA_RESPONSE	number_of_genes	175	number_hot_genes	16	Pvalue	0.001924
Casp1	caspase 1	834	0.532411
Casp7	caspase 7	840	0.507373
Irf4	interferon regulatory factor 4	3662	0.246191
Nfkbia	nuclear factor of kappa light polypeptide gene enhancer in B cells inhibitor, alpha	4792	0.599842
Oas2	2'-5' oligoadenylate synthetase 2	4939	0.140861
Pfkp	phosphofructokinase, platelet	5214	0.371087
Trim25	tripartite motif-containing 25	7706	0.488064
Oasl1	2'-5' oligoadenylate synthetase-like 1	8638	0.229622
Rbck1	RanBP-type and C3HC4-type zinc finger containing 1	10616	0.764951
Ddx58	DEAD (Asp-Glu-Ala-Asp) box polypeptide 58	23586	0.467708
Ddx60	DEAD (Asp-Glu-Ala-Asp) box polypeptide 60	55601	0.116588
Rnf213	ring finger protein 213	57674	0.33315
Ifih1	interferon induced with helicase C domain 1	64135	0.415012
Parp12	poly (ADP-ribose) polymerase family, member 12	64761	0.335057
Cmpk2	cytidine monophosphate (UMP-CMP) kinase 2, mitochondrial	129607	0.246575
Mettl7b	methyltransferase like 7B	196410	0.391099
path_num	35	path_term	HALLMARK_OXIDATIVE_PHOSPHORYLATION	number_of_genes	185	number_hot_genes	15	Pvalue	0.007984
Aco2	aconitase 2, mitochondrial	50	0.657198
Alas1	aminolevulinic acid synthase 1	211	0.470024
Atp5a1	ATP synthase, H+ transporting, mitochondrial F1 complex, alpha subunit 1	498	0.76396
Atp5g3	ATP synthase, H+ transporting, mitochondrial F0 complex, subunit C3 (subunit 9)	518	0.674787
Slc25a20	solute carrier family 25 (mitochondrial carnitine/acylcarnitine translocase), member 20	788	0.601468
Casp7	caspase 7	840	0.507373
Cox10	cytochrome c oxidase assembly protein 10	1352	0.612355
Cyc1	cytochrome c-1	1537	0.516211
Got2	glutamate oxaloacetate transaminase 2, mitochondrial	2806	0.610774
Mdh2	malate dehydrogenase 2, NAD (mitochondrial)	4191	0.724538
Mgst3	microsomal glutathione S-transferase 3	4259	0.512503
Ogdh	oxoglutarate (alpha-ketoglutarate) dehydrogenase (lipoamide)	4967	0.632029
Uqcrc1	ubiquinol-cytochrome c reductase core protein 1	7384	0.581555
Pmpca	peptidase (mitochondrial processing) alpha	23203	0.724067
Htra2	HtrA serine peptidase 2	27429	0.582153
path_num	41	path_term	HALLMARK_REACTIVE_OXIGEN_SPECIES_PATHWAY	number_of_genes	46	number_hot_genes	6	Pvalue	0.009934
Cat	catalase	847	0.545899
Mgst1	microsomal glutathione S-transferase 1	4257	0.497381
Pfkp	phosphofructokinase, platelet	5214	0.371087
Txn1	thioredoxin 1	7295	0.578733
Txnrd2	thioredoxin reductase 2	10587	0.606008
Srxn1	sulfiredoxin 1 homolog (S. cerevisiae)	140809	0.340013
path_num	12	path_term	HALLMARK_E2F_TARGETS	number_of_genes	195	number_hot_genes	15	Pvalue	0.01259
Ak2	adenylate kinase 2	204	0.666557
Cdc25a	cell division cycle 25A	993	0.601894
Mcm5	minichromosome maintenance deficient 5, cell division cycle 46 (S. cerevisiae)	4174	0.451518
Mybl2	myeloblastosis oncogene-like 2	4605	0.548407
Plk1	polo-like kinase 1	5347	0.490587
Pold1	polymerase (DNA directed), delta 1, catalytic subunit	5424	0.580197
Pold2	polymerase (DNA directed), delta 2, regulatory subunit	5425	0.370996
Pole	polymerase (DNA directed), epsilon	5426	0.539866
Shmt1	serine hydroxymethyltransferase 1 (soluble)	6470	0.595397
Tk1	thymidine kinase 1	7083	0.562092
Pttg1	pituitary tumor-transforming gene 1	9232	0.609055
Trip13	thyroid hormone receptor interactor 13	9319	0.666253
Hn1	hematological and neurological expressed sequence 1	51155	0.670741
Lyar	Ly1 antibody reactive clone	55646	0.754803
E2f8	E2F transcription factor 8	79733	0.438363
path_num	2	path_term	HALLMARK_ANDROGEN_RESPONSE	number_of_genes	94	number_hot_genes	9	Pvalue	0.01342
Hmgcr	3-hydroxy-3-methylglutaryl-Coenzyme A reductase	3156	0.521121
Hmgcs1	3-hydroxy-3-methylglutaryl-Coenzyme A synthase 1	3157	0.399997
Idi1	isopentenyl-diphosphate delta isomerase	3422	0.51015
Insig1	insulin induced gene 1	3638	0.411019
Krt8	keratin 8	3856	0.688354
Krt19	keratin 19	3880	0.708447
Maf	avian musculoaponeurotic fibrosarcoma (v-maf) AS42 oncogene homolog	4094	0.419646
Cdc14b	CDC14 cell division cycle 14B	8555	0.478673
Zbtb10	zinc finger and BTB domain containing 10	65986	0.425594
path_num	25	path_term	HALLMARK_INTERFERON_ALPHA_RESPONSE	number_of_genes	82	number_hot_genes	8	Pvalue	0.0173
Casp1	caspase 1	834	0.532411
Mov10	Moloney leukemia virus 10	4343	0.481079
Trim25	tripartite motif-containing 25	7706	0.488064
Oasl1	2'-5' oligoadenylate synthetase-like 1	8638	0.229622
Ddx60	DEAD (Asp-Glu-Ala-Asp) box polypeptide 60	55601	0.116588
Ifih1	interferon induced with helicase C domain 1	64135	0.415012
Parp12	poly (ADP-ribose) polymerase family, member 12	64761	0.335057
Cmpk2	cytidine monophosphate (UMP-CMP) kinase 2, mitochondrial	129607	0.246575
path_num	37	path_term	HALLMARK_PANCREAS_BETA_CELLS	number_of_genes	38	number_hot_genes	5	Pvalue	0.01747
Pklr	pyruvate kinase liver and red blood cell	5313	0.334123
Sst	somatostatin	6750	0.097428
Hnf1a	HNF1 homeobox A	6927	0.400584
Vdr	vitamin D receptor	7421	0.199588
Mafb	v-maf musculoaponeurotic fibrosarcoma oncogene family, protein B (avian)	9935	0.450639
path_num	32	path_term	HALLMARK_MYC_TARGETS_V2	number_of_genes	55	number_hot_genes	5	Pvalue	0.06987
Hk2	hexokinase 2	3099	0.47528
Mcm5	minichromosome maintenance deficient 5, cell division cycle 46 (S. cerevisiae)	4174	0.451518
Plk1	polo-like kinase 1	5347	0.490587
Tcof1	Treacher Collins Franceschetti syndrome 1, homolog	6949	0.407736
Tmem97	transmembrane protein 97	27346	0.413883
path_num	5	path_term	HALLMARK_APICAL_SURFACE	number_of_genes	40	number_hot_genes	4	Pvalue	0.07617
Adam10	a disintegrin and metallopeptidase domain 10	102	0.661498
Ntng1	netrin G1	22854	0.582102
Adipor2	adiponectin receptor 2	79602	0.498924
Pcsk9	proprotein convertase subtilisin/kexin type 9	255738	0.160621
path_num	20	path_term	HALLMARK_HEME_METABOLISM	number_of_genes	182	number_hot_genes	11	Pvalue	0.1181
Cat	catalase	847	0.545899
E2f2	E2F transcription factor 2	1870	0.363694
Epb4.1	erythrocyte protein band 4.1	2035	0.702897
Mgst3	microsomal glutathione S-transferase 3	4259	0.512503
Mxi1	Max interacting protein 1	4601	0.491995
Slc6a8	solute carrier family 6 (neurotransmitter transporter, creatine), member 8	6535	0.347104
Top1	topoisomerase (DNA) I	7150	0.707896
Lpin2	lipin 2	9663	0.166736
Optn	optineurin	10133	0.455441
Htra2	HtrA serine peptidase 2	27429	0.582153
Fam46c	family with sequence similarity 46, member C	54855	0.41701
path_num	17	path_term	HALLMARK_G2M_CHECKPOINT	number_of_genes	186	number_hot_genes	11	Pvalue	0.1315
Cdc25a	cell division cycle 25A	993	0.601894
E2f2	E2F transcription factor 2	1870	0.363694
Mcm5	minichromosome maintenance deficient 5, cell division cycle 46 (S. cerevisiae)	4174	0.451518
Mybl2	myeloblastosis oncogene-like 2	4605	0.548407
Plk1	polo-like kinase 1	5347	0.490587
Pole	polymerase (DNA directed), epsilon	5426	0.539866
Rbl1	retinoblastoma-like 1 (p107)	5933	0.616373
Sqle	squalene epoxidase	6713	0.393769
Top1	topoisomerase (DNA) I	7150	0.707896
Pttg1	pituitary tumor-transforming gene 1	9232	0.609055
Hn1	hematological and neurological expressed sequence 1	51155	0.670741
path_num	46	path_term	HALLMARK_UV_RESPONSE_DN	number_of_genes	141	number_hot_genes	8	Pvalue	0.2091
Anxa4	annexin A4	307	0.655437
Dbp	D site albumin promoter binding protein	1628	0.334488
Id1	inhibitor of DNA binding 1	3397	0.265549
Insig1	insulin induced gene 1	3638	0.411019
Ldlr	low density lipoprotein receptor	3949	0.402688
Slc22a18	solute carrier family 22 (organic cation transporter), member 18	5002	0.569088
Plcb4	phospholipase C, beta 4	5332	0.450636
Ddah1	dimethylarginine dimethylaminohydrolase 1	23576	0.237083
path_num	47	path_term	HALLMARK_UV_RESPONSE_UP	number_of_genes	143	number_hot_genes	8	Pvalue	0.2197
Alas1	aminolevulinic acid synthase 1	211	0.470024
Bak1	BCL2-antagonist/killer 1	578	0.609823
Cdo1	cysteine dioxygenase 1, cytosolic	1036	0.234783
Nfkbia	nuclear factor of kappa light polypeptide gene enhancer in B cells inhibitor, alpha	4792	0.599842
Abcb1a	ATP-binding cassette, sub-family B (MDR/TAP), member 1A	5243	0.290831
Slc6a8	solute carrier family 6 (neurotransmitter transporter, creatine), member 8	6535	0.347104
Tst	thiosulfate sulfurtransferase, mitochondrial	7263	0.442863
Dgat1	diacylglycerol O-acyltransferase 1	8694	0.414872
path_num	4	path_term	HALLMARK_APICAL_JUNCTION	number_of_genes	191	number_hot_genes	10	Pvalue	0.2422
Cldn7	claudin 7	1366	0.70954
Dmp1	dentin matrix protein 1	1758	0.310284
Hadh	hydroxyacyl-Coenzyme A dehydrogenase	3033	0.668832
Insig1	insulin induced gene 1	3638	0.411019
Mvd	mevalonate (diphospho) decarboxylase	4597	0.386391
Mapk13	mitogen-activated protein kinase 13	5603	0.353006
Cldn15	claudin 15	24146	0.2479
Lima1	LIM domain and actin binding 1	51474	0.669047
Pdzd3	PDZ domain containing 3	79849	0.327314
Sirpa	signal-regulatory protein alpha	140885	0.571427
path_num	9	path_term	HALLMARK_COAGULATION	number_of_genes	126	number_hot_genes	7	Pvalue	0.2457
Apoc2	apolipoprotein C-II	344	0.287537
Hnf4a	hepatic nuclear factor 4, alpha	3172	0.432629
Mmp7	matrix metallopeptidase 7	4316	0.107318
Proc	protein C	5624	0.465298
Acox2	acyl-Coenzyme A oxidase 2, branched chain	8309	0.2458
Proz	protein Z, vitamin K-dependent plasma glycoprotein	8858	0.19387
Gng12	guanine nucleotide binding protein (G protein), gamma 12	55970	0.629552
path_num	34	path_term	HALLMARK_NOTCH_SIGNALING	number_of_genes	30	number_hot_genes	2	Pvalue	0.3421
Tcf7l2	transcription factor 7 like 2, T cell specific, HMG box	6934	0.438078
Fzd7	frizzled homolog 7 (Drosophila)	8324	0.663183
path_num	44	path_term	HALLMARK_TNFA_SIGNALING_VIA_NFKB	number_of_genes	189	number_hot_genes	9	Pvalue	0.3524
Gadd45a	growth arrest and DNA-damage-inducible 45 alpha	1647	0.350253
Ldlr	low density lipoprotein receptor	3949	0.402688
Nfkbia	nuclear factor of kappa light polypeptide gene enhancer in B cells inhibitor, alpha	4792	0.599842
Relb	avian reticuloendotheliosis viral (v-rel) oncogene related B	5971	0.590515
Tnip1	TNFAIP3 interacting protein 1	10318	0.641373
Ddx58	DEAD (Asp-Glu-Ala-Asp) box polypeptide 58	23586	0.467708
Ifih1	interferon induced with helicase C domain 1	64135	0.415012
Zbtb10	zinc finger and BTB domain containing 10	65986	0.425594
Zc3h12a	zinc finger CCCH type containing 12A	80149	0.477305
path_num	33	path_term	HALLMARK_MYOGENESIS	number_of_genes	192	number_hot_genes	9	Pvalue	0.3696
Ckb	creatine kinase, brain	1152	0.275899
Fdps	farnesyl diphosphate synthetase	2224	0.41132
Myl1	myosin, light polypeptide 1	4632	0.490203
Rb1	retinoblastoma 1	5925	0.553766
Slc6a8	solute carrier family 6 (neurotransmitter transporter, creatine), member 8	6535	0.347104
Cacna1h	calcium channel, voltage-dependent, T type, alpha 1H subunit	8912	0.492077
Ldb3	LIM domain binding 3	11155	0.333645
Dapk2	death-associated protein kinase 2	23604	0.501697
Plxnb2	plexin B2	23654	0.601248
path_num	36	path_term	HALLMARK_P53_PATHWAY	number_of_genes	192	number_hot_genes	9	Pvalue	0.3696
Abat	4-aminobutyrate aminotransferase	18	0.345874
Bak1	BCL2-antagonist/killer 1	578	0.609823
Casp1	caspase 1	834	0.532411
Gadd45a	growth arrest and DNA-damage-inducible 45 alpha	1647	0.350253
Rb1	retinoblastoma 1	5925	0.553766
Vdr	vitamin D receptor	7421	0.199588
Plxnb2	plexin B2	23654	0.601248
Cyfip2	cytoplasmic FMR1 interacting protein 2	26999	0.385953
Eps8l2	EPS8-like 2	64787	0.476174
path_num	21	path_term	HALLMARK_HYPOXIA	number_of_genes	189	number_hot_genes	8	Pvalue	0.4945
Aldob	aldolase B, fructose-bisphosphate	229	0.124697
Hk2	hexokinase 2	3099	0.47528
Mxi1	Max interacting protein 1	4601	0.491995
Pfkp	phosphofructokinase, platelet	5214	0.371087
Pklr	pyruvate kinase liver and red blood cell	5313	0.334123
Sult2b1	sulfotransferase family, cytosolic, 2B, member 1	6820	0.27539
Plac8	placenta-specific 8	51316	0.664793
B4galnt2	beta-1,4-N-acetyl-galactosaminyl transferase 2	124872	0.388818
path_num	22	path_term	HALLMARK_IL2_STAT5_SIGNALING	number_of_genes	193	number_hot_genes	8	Pvalue	0.5184
Anxa4	annexin A4	307	0.655437
Aplp1	amyloid beta (A4) precursor-like protein 1	333	0.358006
Tnfrsf8	tumor necrosis factor receptor superfamily, member 8	943	0.180585
Hk2	hexokinase 2	3099	0.47528
Irf4	interferon regulatory factor 4	3662	0.246191
Myo1e	myosin IE	4643	0.67866
Abcb1a	ATP-binding cassette, sub-family B (MDR/TAP), member 1A	5243	0.290831
Drc1	dynein regulatory complex subunit 1	92749	0.396227
path_num	27	path_term	HALLMARK_KRAS_SIGNALING_DN	number_of_genes	193	number_hot_genes	8	Pvalue	0.5184
Hnf1a	HNF1 homeobox A	6927	0.400584
Thrb	thyroid hormone receptor beta	7068	0.610191
Capn9	calpain 9	10753	0.28556
Mfsd6	major facilitator superfamily domain containing 6	54842	0.67613
Fam46c	family with sequence similarity 46, member C	54855	0.41701
Sphk2	sphingosine kinase 2	56848	0.570444
Akr1b8	aldo-keto reductase family 1, member B8	57016	0.520284
Camk1d	calcium/calmodulin-dependent protein kinase ID	57118	0.534024
path_num	10	path_term	HALLMARK_COMPLEMENT	number_of_genes	173	number_hot_genes	7	Pvalue	0.5497
Casp1	caspase 1	834	0.532411
Casp7	caspase 7	840	0.507373
Hnf4a	hepatic nuclear factor 4, alpha	3172	0.432629
Me1	malic enzyme 1, NADP(+)-dependent, cytosolic	4199	0.516461
Phex	phosphate regulating endopeptidase homolog, X-linked	5251	0.669492
Pik3r5	phosphoinositide-3-kinase, regulatory subunit 5, p101	23533	0.420294
Pcsk9	proprotein convertase subtilisin/kexin type 9	255738	0.160621
path_num	39	path_term	HALLMARK_PI3K_AKT_MTOR_SIGNALING	number_of_genes	99	number_hot_genes	4	Pvalue	0.569
Prkaa2	protein kinase, AMP-activated, alpha 2 catalytic subunit	5563	0.438563
Prkar2a	protein kinase, cAMP dependent regulatory, type II alpha	5576	0.584567
Ecsit	ECSIT homolog (Drosophila)	51295	0.675691
Pla2g12a	phospholipase A2, group XIIA	81579	0.618928
path_num	43	path_term	HALLMARK_TGF_BETA_SIGNALING	number_of_genes	52	number_hot_genes	2	Pvalue	0.6254
Id1	inhibitor of DNA binding 1	3397	0.265549
Id3	inhibitor of DNA binding 3	3399	0.549551
path_num	23	path_term	HALLMARK_IL6_JAK_STAT3_SIGNALING	number_of_genes	81	number_hot_genes	3	Pvalue	0.6392
Bak1	BCL2-antagonist/killer 1	578	0.609823
Pik3r5	phosphoinositide-3-kinase, regulatory subunit 5, p101	23533	0.420294
Il17rb	interleukin 17 receptor B	55540	0.29191
path_num	28	path_term	HALLMARK_KRAS_SIGNALING_UP	number_of_genes	192	number_hot_genes	7	Pvalue	0.6594
Hist1h2bb	histone cluster 1, H2bb	3018	0.616891
Abcb1a	ATP-binding cassette, sub-family B (MDR/TAP), member 1A	5243	0.290831
Mafb	v-maf musculoaponeurotic fibrosarcoma oncogene family, protein B (avian)	9935	0.450639
Ush1c	Usher syndrome 1C	10083	0.214985
Epb4.1l3	erythrocyte protein band 4.1-like 3	23136	0.23304
Hkdc1	hexokinase domain containing 1	80201	0.425634
Usp12	ubiquitin specific peptidase 12	219333	0.493547
path_num	29	path_term	HALLMARK_MITOTIC_SPINDLE	number_of_genes	193	number_hot_genes	7	Pvalue	0.6647
Abr	active BCR-related gene	29	0.431741
Epb4.1	erythrocyte protein band 4.1	2035	0.702897
Myo1e	myosin IE	4643	0.67866
Plk1	polo-like kinase 1	5347	0.490587
Arhgef11	Rho guanine nucleotide exchange factor (GEF) 11	9826	0.669745
Mid1ip1	Mid1 interacting protein 1 (gastrulation specific G12-like (zebrafish))	58526	0.554442
Sass6	spindle assembly 6 homolog (C. elegans)	163786	0.350493
path_num	42	path_term	HALLMARK_SPERMATOGENESIS	number_of_genes	126	number_hot_genes	4	Pvalue	0.7525
Mep1b	meprin 1 beta	4225	0.141025
Nefh	neurofilament, heavy polypeptide	4744	0.643471
Prkar2a	protein kinase, cAMP dependent regulatory, type II alpha	5576	0.584567
Strbp	spermatid perinuclear RNA binding protein	55342	0.656517
path_num	3	path_term	HALLMARK_ANGIOGENESIS	number_of_genes	36	number_hot_genes	1	Pvalue	0.7729
Lpl	lipoprotein lipase	4023	0.326875
path_num	31	path_term	HALLMARK_MYC_TARGETS_V1	number_of_genes	179	number_hot_genes	5	Pvalue	0.8525
Cyc1	cytochrome c-1	1537	0.516211
Got2	glutamate oxaloacetate transaminase 2, mitochondrial	2806	0.610774
Mcm5	minichromosome maintenance deficient 5, cell division cycle 46 (S. cerevisiae)	4174	0.451518
Pold2	polymerase (DNA directed), delta 2, regulatory subunit	5425	0.370996
Tufm	Tu translation elongation factor, mitochondrial	7284	0.525933
path_num	6	path_term	HALLMARK_APOPTOSIS	number_of_genes	155	number_hot_genes	4	Pvalue	0.8758
Casp1	caspase 1	834	0.532411
Casp7	caspase 7	840	0.507373
Gadd45a	growth arrest and DNA-damage-inducible 45 alpha	1647	0.350253
Nefh	neurofilament, heavy polypeptide	4744	0.643471
path_num	11	path_term	HALLMARK_DNA_REPAIR	number_of_genes	138	number_hot_genes	3	Pvalue	0.9205
Pold1	polymerase (DNA directed), delta 1, catalytic subunit	5424	0.580197
Rfc5	replication factor C (activator 1) 5	5985	0.674705
Cmpk2	cytidine monophosphate (UMP-CMP) kinase 2, mitochondrial	129607	0.246575
path_num	13	path_term	HALLMARK_EPITHELIAL_MESENCHYMAL_TRANSITION	number_of_genes	186	number_hot_genes	4	Pvalue	0.9452
Anpep	alanyl (membrane) aminopeptidase	290	0.145854
Aplp1	amyloid beta (A4) precursor-like protein 1	333	0.358006
Gadd45a	growth arrest and DNA-damage-inducible 45 alpha	1647	0.350253
Slc6a8	solute carrier family 6 (neurotransmitter transporter, creatine), member 8	6535	0.347104
path_num	40	path_term	HALLMARK_PROTEIN_SECRETION	number_of_genes	91	number_hot_genes	1	Pvalue	0.9766
Adam10	a disintegrin and metallopeptidase domain 10	102	0.661498
path_num	24	path_term	HALLMARK_INFLAMMATORY_RESPONSE	number_of_genes	189	number_hot_genes	3	Pvalue	0.9835
Ldlr	low density lipoprotein receptor	3949	0.402688
Nfkbia	nuclear factor of kappa light polypeptide gene enhancer in B cells inhibitor, alpha	4792	0.599842
Pik3r5	phosphoinositide-3-kinase, regulatory subunit 5, p101	23533	0.420294
path_num	45	path_term	HALLMARK_UNFOLDED_PROTEIN_RESPONSE	number_of_genes	107	number_hot_genes	1	Pvalue	0.9879
Slc1a4	solute carrier family 1 (glutamate/neutral amino acid transporter), member 4	6509	0.542983
path_num	1	path_term	HALLMARK_ALLOGRAFT_REJECTION	number_of_genes	181	number_hot_genes	2	Pvalue	0.9951
Cd7	CD7 antigen	924	0.196317
Irf4	interferon regulatory factor 4	3662	0.246191
path_num	19	path_term	HALLMARK_HEDGEHOG_SIGNALING	number_of_genes	36	number_hot_genes	0	Pvalue	1
path_num	48	path_term	HALLMARK_WNT_BETA_CATENIN_SIGNALING	number_of_genes	41	number_hot_genes	0	Pvalue	1

## Sheet: Cdx2Braf_Int_p01F13_MS0_up
1277 up genes for Braf by Cdx2 interaction, p<.01, and ratio-of-ratios >1.3									Results (p-values) from 100 permuted data-sets in which the gene labels of our selected genes were randomly permuted.
15735 human homologs			p<.00001	6					0	0	0	0	0	0	0	0	0	0	0	0	0	0	0	0	0	0	0	0	0	0	0	0	0	0	0	0	0	0	0	0	0	0	0	0	0	0	0	0	0
50 Hallmark gene sets from MSigDB			p<.0001	8					0	0	0	0	0	0	0	0	0	0	0	0	0	0	0	0	0	0	0	0	0	0	0	0	0	0	0	0	0	0	0	0	0	0	0	0	0	0	0	0	0
http://www.broadinstitute.org/gsea/msigdb/index.jsp			p<.001	10					0	0	0	0	0	0	0	0	0	0	0	0	0	0	0	0	0	0	0	0	0	0	0	0	0	0	0	0	0	0	0	0	0	0	0	0	0	0	0	0	0
			p<.005	13					0	0	0	0	0	0	0	0	0	0	0	0	1	0	0	0	0	0	0	0	0	0	1	0	0	0	0	0	0	0	0	0	0	0	1	0	0	0	0	0	0
			p<.01	13					0	0	1	1	0	0	0	0	0	0	0	0	1	0	0	0	0	0	0	0	0	0	2	1	0	1	0	0	1	0	0	0	0	0	1	0	0	0	0	0	0
			p<.05	16					1	4	3	2	3	0	4	1	3	1	4	1	2	1	0	2	2	2	1	3	2	1	2	2	1	3	1	1	2	1	0	0	0	0	5	1	2	3	4	1	0
Path_ID	Title	number of genes on list	number of those genes we selected	actual pvalue (One-sided Fisher Exact test)	number of categories that good in our data	estimated FDR, based on perms (Q-value)	observed/expected	rank on down list	iteration0	iteration1	iteration2	iteration3	iteration4	iteration5	iteration6	iteration7	iteration8	iteration9	iteration10	iteration11	iteration12	iteration13	iteration14	iteration15	iteration16	iteration17	iteration18	iteration19	iteration20	iteration21	iteration22	iteration23	iteration24	iteration25	iteration26	iteration27	iteration28	iteration29	iteration30	iteration31	iteration32	iteration33	iteration34	iteration35	iteration36	iteration37	iteration38	iteration39	iteration40
13	HALLMARK_EPITHELIAL_MESENCHYMAL_TRANSITION	186	69	1.049e-28	1	0	4.57101	44	0.177	0.02798	0.8341	0.942	0.5495	0.442	0.3406	0.3406	0.02798	0.7524	0.8341	0.442	0.442	0.7524	0.2511	0.177	0.8974	0.8974	0.6554	0.177	0.5495	0.442	0.177	0.6554	0.6554	0.442	0.8341	0.0769	0.1193	0.9704	0.3406	0.6554	0.5495	0.0769	0.1193	0.442	0.5495	0.3406	0.6554	0.6554	0.442
28	HALLMARK_KRAS_SIGNALING_UP	192	41	7.338e-09	2	0	2.63123	37	0.1489	0.2958	0.3905	0.9547	0.2145	0.7905	0.7905	0.02245	0.4941	0.7905	0.7012	0.9547	0.99	0.01258	0.8632	0.9547	0.8632	0.2958	0.099	0.3905	0.02245	0.6002	0.3905	0.4941	0.7012	0.7905	0.9775	0.7905	0.4941	0.9961	0.099	0.2958	0.4941	0.8632	0.03841	0.03841	0.2958	0.8632	0.6002	0.6002	0.7905
21	HALLMARK_HYPOXIA	189	36	1.148e-06	3	0	2.34702	30	0.6788	0.1337	0.908	0.908	0.3654	0.2731	0.3654	0.2731	0.5751	0.5751	0.4682	0.3654	0.1337	0.3654	0.4682	0.9954	0.5751	0.9742	0.1953	0.8492	0.03289	0.1953	0.2731	0.4682	0.5751	0.8492	0.4682	0.5751	0.908	0.3654	0.772	0.9742	0.2731	0.6788	0.3654	0.8492	0.4682	0.8492	0.2731	0.3654	0.1337
9	HALLMARK_COAGULATION	126	27	2.447e-06	4	0	2.6404	25	0.1424	0.7031	0.7031	0.7031	0.8119	0.8945	0.8945	0.8119	0.3248	0.5769	0.7031	0.3248	0.4464	0.2219	0.7031	0.2219	0.08584	0.2219	0.9932	0.8119	0.7031	0.7031	0.3248	0.2219	0.04866	0.5769	0.7031	0.4464	0.8945	0.3248	0.1424	0.9792	0.8119	0.08584	0.8119	0.9488	0.7031	0.3248	0.9932	0.9488	0.3248
44	HALLMARK_TNFA_SIGNALING_VIA_NFKB	189	35	3.151e-06	5	0	2.28182	27	0.8492	0.772	0.8492	0.4682	0.772	0.08749	0.4682	0.4682	0.5751	0.9742	0.3654	0.0189	0.3654	0.6788	0.908	0.3654	0.2731	0.5751	0.08749	0.05482	0.3654	0.8492	0.8492	0.1953	0.5751	0.3654	0.1337	0.3654	0.5751	0.8492	0.1953	0.9954	0.3654	0.6788	0.8492	0.5751	0.1337	0.5751	0.3654	0.6788	0.05482
46	HALLMARK_UV_RESPONSE_DN	141	28	7.615e-06	6	0	2.44689	22	0.9913	0.2538	0.5995	0.5995	0.03655	0.717	0.5995	0.717	0.4759	0.1702	0.3575	0.3575	0.5995	0.5995	0.06453	0.5995	0.4759	0.0196	0.8175	0.3575	0.4759	0.8175	0.717	0.8943	0.8175	0.8175	0.8943	0.0196	0.00997	0.9913	0.717	0.8943	0.3575	0.2538	0.4759	0.1702	0.4759	0.4759	0.5995	0.717	0.1078
3	HALLMARK_ANGIOGENESIS	36	12	1.544e-05	7	0	4.10728	40	0.8018	0.8018	0.8018	0.5682	0.8018	0.3343	0.8018	0.3343	0.1638	0.1638	0.9527	0.1638	0.06756	0.5682	0.9527	0.3343	0.8018	0.06756	0.5682	0.8018	0.9527	0.5682	0.5682	0.5682	0.9527	0.3343	0.5682	0.5682	0.3343	0.9527	0.9527	0.8018	0.8018	0.5682	0.02371	0.06756	0.5682	0.9527	0.02371	0.9527	0.8018
24	HALLMARK_INFLAMMATORY_RESPONSE	189	32	5.287e-05	8	0	2.08624	46	0.4682	0.08749	0.5751	0.8492	0.1953	0.2731	0.772	0.1337	0.4682	0.8492	0.0189	0.1953	0.4682	0.08749	0.9487	0.6788	0.2731	0.2731	0.1953	0.03289	0.05482	0.772	0.6788	0.05482	0.5751	0.1337	0.3654	0.05482	0.6788	0.1953	0.908	0.9954	0.772	0.5751	0.1337	0.9487	0.3654	0.1953	0.9487	0.4682	0.3654
22	HALLMARK_IL2_STAT5_SIGNALING	193	30	0.0004177	9	0	1.91531	31	0.3989	0.3989	0.3034	0.6084	0.7084	0.8677	0.6084	0.5027	0.06591	0.8677	0.5027	0.7084	0.6084	0.9207	0.8677	0.3034	0.9207	0.9785	0.3989	0.9207	0.3034	0.5027	0.007235	0.06591	0.9207	0.9905	0.3034	0.8677	0.06591	0.8677	0.6084	0.5027	0.6084	0.7964	0.3989	0.3989	0.7084	0.7084	0.3989	0.7084	0.6084
4	HALLMARK_APICAL_JUNCTION	191	29	0.0007621	10	0.001	1.87086	24	0.7844	0.6938	0.4855	0.5919	0.6938	0.9764	0.208	0.6938	0.06018	0.5919	0.3821	0.3821	0.1437	0.2881	0.9145	0.4855	0.3821	0.6938	0.2881	0.01182	0.9895	0.7844	0.8587	0.1437	0.09506	0.6938	0.7844	0.8587	0.1437	0.6938	0.8587	0.9528	0.3821	0.9528	0.09506	0.5919	0.6938	0.6938	0.6938	0.4855	0.2881
10	HALLMARK_COMPLEMENT	173	26	0.001616	11	0.00272727	1.85184	33	0.9745	0.4339	0.9035	0.6551	0.8395	0.4339	0.5451	0.2392	0.8395	0.9474	0.04105	0.4339	0.6551	0.2392	0.1089	0.4339	0.04105	0.1089	0.7555	0.7555	0.8395	0.1089	0.1653	0.1089	0.6551	0.5451	0.9745	0.9988	0.3298	0.1089	0.2392	0.6551	0.996	0.4339	0.5451	0.7555	0.5451	0.8395	0.8395	0.7555	0.5451
36	HALLMARK_P53_PATHWAY	192	28	0.001737	12	0.00333333	1.79694	29	0.7012	0.2145	0.2958	0.3905	0.02245	0.7012	0.7905	0.3905	0.4941	0.7012	0.2958	0.6002	0.9547	0.1489	0.3905	0.4941	0.6002	0.4941	0.3905	0.2958	0.9176	0.7012	0.3905	0.2145	0.2145	0.2958	0.099	0.3905	0.9176	0.4941	0.99	0.6002	0.2958	0.4941	0.9547	0.7012	0.099	0.3905	0.7905	0.6002	0.4941
23	HALLMARK_IL6_JAK_STAT3_SIGNALING	81	15	0.001996	13	0.00384615	2.28182	36	0.1193	0.6517	0.7969	0.489	0.6517	0.0622	0.9034	0.335	0.335	0.489	0.9915	0.7969	0.489	0.489	0.335	0.6517	0.9915	0.489	0.489	0.2093	0.489	0.6517	0.489	0.489	0.0622	0.9034	0.0622	0.6517	0.6517	0.9034	0.1193	0.335	0.489	0.6517	0.6517	0.7969	0.2093	0.6517	0.335	0.9651	0.489
8	HALLMARK_CHOLESTEROL_HOMEOSTASIS	72	11	0.02985	14	0.0792857	1.8825	1	0.1275	0.1275	0.2276	0.8463	0.3673	0.535	0.01258	0.9388	0.705	0.9388	0.1275	0.8463	0.06469	0.3673	0.8463	0.9388	1	0.2276	0.1275	0.3673	0.9388	0.535	0.8463	0.2276	0.3673	0.3673	0.705	0.9388	0.3673	0.535	0.1275	0.2276	0.9836	0.705	0.2276	0.705	0.1275	0.1275	0.535	0.3673	0.9388
33	HALLMARK_MYOGENESIS	192	23	0.03841	15	0.0973333	1.47605	28	0.3905	0.2145	0.9547	0.2958	0.099	0.9176	0.9547	0.2145	0.2145	0.2958	0.099	0.9775	0.7905	0.6002	0.9176	0.7905	0.4941	0.99	0.2145	0.1489	0.7012	0.8632	0.7905	0.6002	0.2958	0.9547	0.4941	0.2958	0.7012	0.8632	0.099	0.9775	0.7012	0.1489	0.8632	0.099	0.7905	0.1489	0.7012	0.9775	0.099
6	HALLMARK_APOPTOSIS	155	19	0.04613	16	0.110625	1.51042	42	0.8171	0.2759	0.6109	0.8907	0.9416	0.3785	0.722	0.493	0.6109	0.493	0.3785	0.1908	0.8171	0.3785	0.722	0.6109	0.1252	0.8907	0.8171	0.07799	0.493	0.6109	0.8171	0.1908	0.8171	0.04613	0.493	0.07799	0.493	0.493	0.8171	0.9962	0.8171	0.8171	0.1908	0.3785	0.2759	0.6109	0.6109	0.9889	0.2759
43	HALLMARK_TGF_BETA_SIGNALING	52	8	0.0569	17	0.122941	1.89567	35	0.6182	0.02283	0.6182	0.6182	0.2443	0.805	0.6182	0.0569	0.805	0.805	0.6182	0.2443	0.002617	0.805	0.9878	0.6182	0.805	0.4159	0.805	0.4159	0.805	0.9317	0.0569	0.2443	0.1256	0.6182	0.6182	0.4159	0.805	0.805	0.6182	0.6182	0.4159	0.4159	0.9317	0.0569	0.805	0.9317	0.1256	0.9317	0.1256
47	HALLMARK_UV_RESPONSE_UP	143	17	0.07165	18	0.144444	1.46484	23	0.3767	0.01157	0.3767	0.4959	0.1839	0.6185	0.7332	0.2707	0.9508	0.02241	0.04117	0.07165	0.1839	0.6185	0.7332	0.2707	0.2707	0.3767	0.6185	0.118	0.9026	0.3767	0.1839	0.3767	0.4959	0.1839	0.3767	0.4959	0.9026	0.3767	0.9026	0.8298	0.9508	0.1839	0.9026	0.7332	0.8298	0.02241	0.6185	0.6185	0.2707
34	HALLMARK_NOTCH_SIGNALING	30	5	0.09142	19	0.172105	2.05364	26	0.9213	0.9213	0.7122	0.9213	1	0.09142	0.9213	0.9213	0.7122	0.7122	0.4442	0.9213	0.09142	0.9213	0.4442	0.4442	0.4442	0.7122	0.7122	0.9213	0.2231	1	0.7122	1	0.9213	0.7122	0.7122	0.2231	0.9213	0.7122	1	0.9213	0.4442	0.4442	0.4442	1	0.2231	0.9213	0.9213	0.7122	0.7122
5	HALLMARK_APICAL_SURFACE	40	6	0.1017	20	0.186	1.84828	19	0.8469	0.9663	0.6408	0.9663	0.8469	0.4101	0.8469	0.2215	0.1017	0.6408	0.6408	0.8469	0.2215	0.6408	0.4101	0.6408	0.4101	0.6408	0.6408	0.2215	0.9663	0.6408	0.4101	0.4101	0.8469	0.1017	0.6408	0.4101	0.4101	0.8469	0.8469	0.6408	0.9663	0.8469	0.2215	0.9663	0.6408	0.8469	0.2215	0.6408	1
40	HALLMARK_PROTEIN_SECRETION	91	11	0.1182	21	0.214286	1.48945	45	0.1182	0.9442	0.01466	0.8709	0.2022	0.3184	0.9442	0.6148	0.2022	0.9817	0.461	0.2022	0.8709	0.8709	0.3184	0.461	0.2022	0.1182	0.9442	0.2022	0.8709	0.6148	0.2022	0.6148	0.1182	0.461	0.6148	0.996	0.1182	0.6148	0.461	0.2022	0.8709	0.758	0.3184	0.6148	0.8709	0.03176	0.3184	0.1182	0.6148
15	HALLMARK_ESTROGEN_RESPONSE_LATE	189	20	0.1337	22	0.231818	1.3039	4	0.772	0.772	0.00551	0.3654	0.6788	0.772	0.5751	0.3654	0.1953	0.908	0.4682	0.3654	0.5751	0.5751	0.908	0.08749	0.908	0.2731	0.2731	0.6788	0.4682	0.772	0.772	0.5751	0.5751	0.1337	0.5751	0.4682	0.5751	0.908	0.3654	0.4682	0.9884	0.4682	0.6788	0.6788	0.8492	0.9487	0.08749	0.8492	0.9884
2	HALLMARK_ANDROGEN_RESPONSE	94	11	0.1393	23	0.227826	1.44192	15	0.1393	0.8881	0.4982	0.7848	0.6491	0.1393	0.8881	0.7848	0.1393	0.985	0.231	0.7848	0.03996	0.6491	0.6491	0.03996	0.985	0.231	0.4982	0.4982	0.9529	0.4982	0.8881	0.07756	0.7848	0.1393	0.231	0.1393	0.3533	0.985	0.6491	0.985	0.8881	0.4982	0.7848	0.7848	0.6491	0.3533	0.231	0.9529	0.8881
18	HALLMARK_GLYCOLYSIS	193	20	0.1542	24	0.2425	1.27688	9	0.0404	0.3989	0.9566	0.9905	0.3989	0.06591	0.5027	0.7084	0.6084	0.6084	0.3989	0.3989	0.5027	0.9207	0.7084	0.7084	0.3989	0.7964	0.6084	0.9964	0.3989	0.5027	0.7964	0.6084	0.8677	0.01338	0.0404	0.7964	0.3034	0.8677	0.3034	0.9566	0.7084	0.9566	0.3989	0.9905	0.7084	0.7964	0.6084	0.5027	0.1542
19	HALLMARK_HEDGEHOG_SIGNALING	36	5	0.1638	25	0.2476	1.71137	49	0.9527	0.5682	0.3343	0.8018	0.8018	0.1638	0.1638	1	0.3343	0.5682	0.5682	0.1638	0.3343	1	1	0.8018	0.8018	0.8018	0.5682	0.1638	0.9527	0.9527	1	0.9527	1	0.8018	0.5682	0.8018	0.02371	1	0.5682	0.8018	0.9527	0.8018	0.5682	0.8018	0.3343	0.3343	0.8018	0.8018	0.1638
38	HALLMARK_PEROXISOME	101	11	0.1954	26	0.291154	1.34198	8	0.1167	0.1167	0.1954	0.3032	0.9207	0.4361	0.5816	0.8384	0.1167	0.1167	0.9906	0.7217	0.1954	0.4361	0.9686	0.5816	0.4361	0.1954	0.1167	0.5816	0.9207	0.5816	0.003015	0.7217	0.1954	0.4361	0.4361	0.7217	0.8384	0.5816	0.4361	0.1167	0.7217	0.5816	0.8384	0.7217	0.8384	0.5816	0.4361	0.7217	0.5816
1	HALLMARK_ALLOGRAFT_REJECTION	181	18	0.2162	27	0.303704	1.22538	48	0.1486	0.9291	0.3002	0.1486	0.9291	0.2162	0.8776	0.06124	0.03673	0.3984	0.3002	0.1486	0.3002	0.3984	0.3002	0.8065	0.3002	0.3984	0.9629	0.2162	0.2162	0.6146	0.3984	0.006088	0.5057	0.8776	0.3984	0.3984	0.1486	0.03673	0.5057	0.9291	0.8065	0.6146	0.8065	0.5057	0.03673	0.8065	0.7173	0.5057	0.5057
14	HALLMARK_ESTROGEN_RESPONSE_EARLY	190	18	0.2806	28	0.4	1.16733	10	0.4768	0.7782	0.02003	0.09122	0.989	0.6863	0.03466	0.4768	0.7782	0.5835	0.5835	0.3737	0.6863	0.7782	0.5835	0.5835	0.854	0.2806	0.09122	0.2016	0.6863	0.5835	0.1386	0.9957	0.5835	0.5835	0.05746	0.6863	0.854	0.9753	0.2806	0.5835	0.989	0.09122	0.6863	0.4768	0.4768	0.6863	0.3737	0.2806	0.5835
30	HALLMARK_MTORC1_SIGNALING	193	18	0.3034	29	0.433448	1.14919	5	0.6084	0.5027	0.5027	0.7964	0.8677	0.7084	0.7964	0.5027	0.3034	0.3989	0.6084	0.8677	0.7964	0.8677	0.9207	0.8677	0.3989	0.8677	0.3989	0.7964	0.6084	0.7964	0.2211	0.1542	0.9207	0.2211	0.7084	0.3034	0.3034	0.2211	0.2211	0.9566	0.5027	0.2211	0.2211	0.103	0.5027	0.2211	0.103	0.3989	0.3989
20	HALLMARK_HEME_METABOLISM	182	17	0.3082	30	0.421667	1.15094	20	0.623	0.7245	0.223	0.02233	0.1017	0.3082	0.02233	0.1541	0.9319	0.3082	0.02233	0.4071	0.3082	0.623	0.623	0.1541	0.5145	0.623	0.9977	0.5145	0.9835	0.5145	0.7245	0.8123	0.7245	0.7245	0.223	0.8123	0.9319	0.8818	0.9319	0.06418	0.4071	0.4071	0.06418	0.623	0.9933	0.8123	0.3082	0.4071	0.9835
49	HALLMARK_XENOBIOTIC_METABOLISM	194	18	0.3112	31	0.410323	1.14326	3	0.8022	0.8022	0.872	0.4073	0.04246	0.1597	0.1597	0.3112	0.991	0.7156	0.9584	0.6165	0.3112	0.5113	0.991	0.06891	0.8022	0.2278	0.9236	0.5113	0.7156	0.7156	0.2278	0.1072	0.5113	0.1597	0.2278	0.4073	0.9795	0.7156	0.7156	0.5113	0.1072	0.8022	0.04246	0.4073	0.6165	0.9236	0.7156	0.7156	0.8022
48	HALLMARK_WNT_BETA_CATENIN_SIGNALING	41	4	0.4288	32	0.561875	1.20213	50	0.6576	0.8566	0.6576	0.8566	1	0.4288	0.4288	0.6576	1	0.1114	0.2368	0.2368	0.969	0.4288	0.4288	0.6576	0.8566	0.8566	1	0.04501	0.969	0.4288	0.8566	0.2368	0.969	0.2368	0.4288	0.4288	0.4288	0.2368	0.6576	0.8566	0.8566	0.6576	0.001305	0.2368	0.04501	0.6576	0.2368	0.6576	0.6576
11	HALLMARK_DNA_REPAIR	138	11	0.5703	33	0.751515	0.982176	43	0.6915	0.03034	0.6915	0.7978	0.2292	0.5703	0.7978	0.8808	0.5703	0.6915	0.5703	0.05478	0.938	0.8808	0.4456	0.03034	0.329	0.09349	0.4456	0.2292	0.7978	0.4456	0.8808	0.6915	0.329	0.8808	0.6915	0.2292	0.938	0.2292	0.7978	0.4456	0.7978	0.8808	0.6915	0.6915	0.1507	0.5703	0.8808	0.6915	0.6915
0	HALLMARK_ADIPOGENESIS	191	15	0.5919	34	0.765	0.967684	2	0.5919	0.8587	0.7844	0.8587	0.6938	0.9145	0.2881	0.1437	0.9528	0.6938	0.9145	0.2881	0.3821	0.7844	0.3821	0.06018	0.8587	0.9764	0.5919	0.2881	0.06018	0.9145	0.5919	0.2881	0.1437	0.3821	0.7844	0.4855	0.3821	0.9528	0.4855	0.4855	0.4855	0.7844	0.3821	0.9145	0.5919	0.8587	0.9145	0.9145	0.8587
7	HALLMARK_BILE_ACID_METABOLISM	109	8	0.668	35	0.868286	0.904356	6	0.3913	0.2695	0.5291	0.3913	0.5291	0.2695	0.5291	0.5291	0.2695	0.668	0.5291	0.5291	0.1729	0.668	0.8858	0.1729	0.5291	0.5291	0.5291	0.7913	0.7913	0.1033	0.1033	0.668	0.668	0.3913	0.5291	0.7913	0.7913	0.999	0.2695	0.668	0.668	0.1729	0.9805	0.5291	0.7913	0.9474	0.668	0.7913	0.7913
41	HALLMARK_REACTIVE_OXIGEN_SPECIES_PATHWAY	46	3	0.7327	36	0.95	0.803599	13	0.9797	0.3167	0.3167	0.9797	0.8972	0.5194	0.5194	0.7327	0.5194	0.3167	0.8972	0.8972	0.9797	0.9797	0.7327	1	0.7327	0.5194	0.8972	0.7327	0.5194	0.5194	0.7327	0.7327	0.9797	0.5194	0.1664	0.1664	0.0758	0.3167	0.7327	0.5194	0.3167	0.5194	0.3167	0.9797	0.8972	0.5194	0.1664	0.7327	0.1664
45	HALLMARK_UNFOLDED_PROTEIN_RESPONSE	107	7	0.7752	37	0.955676	0.806102	47	0.5062	0.2502	0.7752	0.8752	0.2502	0.3689	0.9416	0.2502	0.5062	0.2502	0.7752	0.6475	0.1577	0.7752	0.8752	0.7752	0.5062	0.2502	0.1577	0.9416	0.2502	0.01235	0.1577	0.1577	0.6475	0.8752	0.2502	0.09257	0.6475	0.9937	0.5062	0.1577	0.6475	0.05063	0.2502	0.7752	0.09257	0.8752	0.9416	0.7752	0.2502
16	HALLMARK_FATTY_ACID_METABOLISM	149	10	0.778	38	0.933158	0.82697	7	0.5548	0.1521	0.09609	0.9845	0.6726	0.6726	0.778	0.5548	0.435	0.5548	0.9985	0.778	0.5548	0.863	0.3235	0.5548	0.435	0.1521	0.03269	0.6726	0.778	0.435	0.3235	0.6726	0.863	0.435	0.3235	0.5548	0.5548	0.5548	0.5548	0.9242	0.435	0.6726	0.435	0.9845	0.863	0.778	0.09609	0.435	0.3235
37	HALLMARK_PANCREAS_BETA_CELLS	38	2	0.8256	39	0.997179	0.648518	17	0.3723	0.9601	0.8256	0.3723	0.9601	0.6056	0.8256	0.3723	0.8256	0.8256	0.6056	0.1919	0.6056	0.1919	0.3723	1	0.1919	0.6056	0.6056	0.8256	0.9601	0.3723	0.8256	0.6056	0.1919	0.6056	0.3723	0.9601	0.1919	0.9601	0.6056	0.1919	1	0.8256	0.03115	0.3723	0.6056	0.1919	0.6056	0.03115	0.1919
26	HALLMARK_INTERFERON_GAMMA_RESPONSE	175	11	0.8498	40	1.00625	0.774516	11	0.4519	0.769	0.9518	0.5629	0.3468	0.3468	0.769	0.1774	0.04556	0.2539	0.3468	0.3468	0.07511	0.769	0.769	0.8498	0.01462	0.4519	0.3468	0.2539	0.1774	0.9518	0.3468	0.2539	0.4519	0.9768	0.769	0.9518	0.6713	0.1182	0.769	0.769	0.3468	0.769	0.1182	0.5629	0.4519	0.9518	0.9902	0.6713	0.3468
25	HALLMARK_INTERFERON_ALPHA_RESPONSE	82	4	0.9085	41	1.05732	0.601066	16	0.8056	0.9085	0.9085	0.5023	0.6635	0.2195	0.5023	0.9085	0.5023	0.2195	0.9673	0.3475	0.5023	0.3475	0.9085	0.9673	0.1266	0.8056	0.3475	0.1266	0.9673	0.9673	0.3475	0.1266	0.6635	0.6635	0.8056	0.8056	0.5023	0.3475	0.6635	0.8056	0.8056	0.2195	0.2195	0.6635	0.2195	0.9673	0.9673	0.3475	0.5023
39	HALLMARK_PI3K_AKT_MTOR_SIGNALING	99	4	0.9647	42	1.11905	0.497852	34	0.5584	0.1784	0.282	0.8243	0.1045	0.8243	0.9124	0.4124	0.8243	0.9892	0.1045	0.282	0.282	0.8243	0.282	0.1045	0.8243	0.1784	0.5584	0.7021	0.7021	0.7021	0.282	0.02866	0.7021	0.005911	0.5584	0.7021	0.7021	0.1045	0.8243	0.9647	0.282	0.282	0.8243	0.7021	0.8243	0.7021	0.01347	0.282	0.4124
29	HALLMARK_MITOTIC_SPINDLE	193	8	0.9905	43	1.13535	0.51075	38	0.3034	0.8677	0.7084	0.9207	0.7964	0.5027	0.7964	0.9905	0.6084	0.9207	0.3989	0.5027	0.3034	0.5027	0.7964	0.6084	0.3034	0.3989	0.9566	0.3989	0.7084	0.3034	0.5027	0.5027	0.7084	0.9207	0.7084	0.7084	0.6084	0.2211	0.3989	0.3989	0.103	0.3034	0.3034	0.5027	0.6084	0.6084	0.02373	0.8677	0.7964
32	HALLMARK_MYC_TARGETS_V2	55	1	0.9906	44	1.11023	0.224034	18	0.4648	0.1555	0.6626	0.2866	0.4648	0.9446	0.8346	0.8346	1	0.6626	0.2866	0.4648	0.9446	0.4648	0.6626	0.6626	0.6626	0.1555	0.8346	0.4648	0.1555	0.2866	0.6626	0.2866	0.4648	0.4648	0.4648	0.6626	0.6626	0.4648	0.1555	0.6626	0.8346	0.6626	0.6626	0.6626	0.9446	0.8346	0.4648	0.8346	0.8346
35	HALLMARK_OXIDATIVE_PHOSPHORYLATION	185	7	0.9943	45	1.08978	0.466232	12	0.8289	0.5408	0.8937	0.8289	0.3324	0.5408	0.8289	0.1711	0.3324	0.2439	0.7456	0.3324	0.4333	0.4333	0.3324	0.4333	0.5408	0.3324	0.9999	0.8289	0.2439	0.3324	0.8289	0.1148	0.7456	0.3324	0.998	0.4333	0.07357	0.2439	0.7456	0.1711	0.1711	0.3324	0.4333	0.2439	0.4333	0.5408	0.1148	0.2439	0.5408
17	HALLMARK_G2M_CHECKPOINT	186	7	0.9946	46	1.06739	0.463725	21	0.7524	0.9946	0.7524	0.6554	0.7524	0.9865	0.9865	0.9946	0.942	0.8341	0.442	0.942	0.942	0.6554	0.177	0.177	0.6554	0.6554	0.7524	0.6554	0.5495	0.942	0.177	0.177	0.3406	0.8974	0.2511	0.177	0.442	0.442	0.7524	0.442	0.1193	0.6554	0.7524	0.8341	0.8341	0.3406	0.3406	0.5495	0.6554
12	HALLMARK_E2F_TARGETS	195	7	0.9967	47	1.04894	0.442323	14	0.7226	0.8762	0.4158	0.9601	0.8762	0.5199	0.9264	0.8762	0.2345	0.1114	0.9264	0.8079	0.9264	0.8079	0.9804	0.7226	0.072	0.1652	0.8079	0.5199	0.319	0.4158	0.8762	0.2345	0.6246	0.9264	0.2345	0.8079	0.1114	0.1652	0.319	0.8762	0.4158	0.8762	0.9264	0.9264	0.8762	0.04459	0.6246	0.5199	0.5199
42	HALLMARK_SPERMATOGENESIS	126	3	0.9983	48	1.02896	0.293377	39	0.4464	0.8945	0.2219	0.9488	0.5769	0.8119	0.8119	0.7031	0.1424	0.8945	0.5769	0.4464	0.8945	0.5769	0.7031	0.5769	0.3248	0.02597	0.9792	0.8945	0.2219	0.1424	0.3248	0.9488	0.7031	0.4464	0.3248	0.2219	0.3248	0.7031	0.9932	0.3248	0.4464	0.8119	0.3248	0.4464	0.3248	0.9932	0.04866	0.8119	0.5769
27	HALLMARK_KRAS_SIGNALING_DN	193	6	0.9988	49	1.00918	0.383063	32	0.6084	0.8677	0.8677	0.007235	0.5027	0.7964	0.7084	0.9566	0.7084	0.6084	0.7964	0.2211	0.6084	0.7084	0.7084	0.2211	0.3034	0.2211	0.2211	0.5027	0.9905	0.7084	0.103	0.7964	0.2211	0.5027	0.5027	0.3034	0.9566	0.7084	0.3989	0.6084	0.2211	0.3034	0.6084	0.7964	0.8677	0.8677	0.3989	0.6084	0.5027
31	HALLMARK_MYC_TARGETS_V1	179	5	0.9992	50	0.9896	0.344186	41	0.08967	0.7024	0.3811	0.3811	0.7945	0.9233	0.033	0.3811	0.5977	0.7024	0.7945	0.7945	0.4879	0.9809	0.7945	0.3811	0.7945	0.5977	0.7024	0.5977	0.4879	0.5977	0.05564	0.8688	0.2028	0.4879	0.5977	0.9233	0.8688	0.4879	0.7024	0.2845	0.4879	0.7945	0.7024	0.4879	0.2845	0.7024	0.2845	0.2845	0.5977
[truncated: 61 more columns]

## Sheet: up_genes
Most significant paths, Individual gene entries show symbol, title, Entrez_gene_ID, fold_change (Symbol is for mouse, but gene ID is for human).
path_num	13	path_term	HALLMARK_EPITHELIAL_MESENCHYMAL_TRANSITION	number_of_genes	186	number_hot_genes	69	Pvalue	1.049e-28
Areg	amphiregulin	374	6.39953
Bdnf	brain derived neurotrophic factor	627	1.78618
Bmp1	bone morphogenetic protein 1	649	2.37176
Calu	calumenin	813	1.91894
Serpinh1	serine (or cysteine) peptidase inhibitor, clade H, member 1	871	2.25867
Cd44	CD44 antigen	960	2.71205
Cdh11	cadherin 11	1009	3.9172
Col1a2	collagen, type I, alpha 2	1278	2.8756
Col3a1	collagen, type III, alpha 1	1281	2.92568
Col4a1	collagen, type IV, alpha 1	1282	3.3773
Col4a2	collagen, type IV, alpha 2	1284	2.09622
Col5a2	collagen, type V, alpha 2	1290	3.81386
Col12a1	collagen, type XII, alpha 1	1303	11.5574
Vcan	versican	1462	4.38818
Ctgf	connective tissue growth factor	1490	10.1178
Dcn	decorin	1634	2.45391
Ecm1	extracellular matrix protein 1	1893	2.86077
Fbln2	fibulin 2	2199	2.70952
Fbn1	fibrillin 1	2200	3.14172
Fgf2	fibroblast growth factor 2	2247	1.45576
Gja1	gap junction protein, alpha 1	2697	2.63808
Gpx7	glutathione peroxidase 7	2882	2.32655
Tnc	tenascin C	3371	4.90684
Igfbp3	insulin-like growth factor binding protein 3	3486	3.62066
Cyr61	cysteine rich protein 61	3491	3.5052
Il6	interleukin 6	3569	13.804
Itga5	integrin alpha 5 (fibronectin receptor alpha)	3678	2.19852
Itgb1	integrin beta 1 (fibronectin receptor beta)	3688	1.59062
Lama2	laminin, alpha 2	3908	3.49559
Lama3	laminin, alpha 3	3909	2.22341
Lamc2	laminin, gamma 2	3918	3.61858
Lgals1	lectin, galactose binding, soluble 1	3956	3.10275
Lox	lysyl oxidase	4015	15.1622
Matn2	matrilin 2	4147	4.17999
Mmp2	matrix metallopeptidase 2	4313	3.59841
Mmp3	matrix metallopeptidase 3	4314	7.8565
Mmp14	matrix metallopeptidase 14 (membrane-inserted)	4323	1.83935
Nt5e	5' nucleotidase, ecto	4907	5.10736
Tnfrsf11b	tumor necrosis factor receptor superfamily, member 11b (osteoprotegerin)	4982	4.30031
Serpine1	serine (or cysteine) peptidase inhibitor, clade E, member 1	5054	9.78103
Pfn2	profilin 2	5217	2.1935
Serpine2	serine (or cysteine) peptidase inhibitor, clade E, member 2	5270	7.02007
Plaur	plasminogen activator, urokinase receptor	5329	2.60305
Plod2	procollagen lysine, 2-oxoglutarate 5-dioxygenase 2	5352	4.51075
Prrx1	paired related homeobox 1	5396	2.29908
Qsox1	quiescin Q6 sulfhydryl oxidase 1	5768	3.19917
Rgs4	regulator of G-protein signaling 4	5999	3.20497
Sat1	spermidine/spermine N1-acetyl transferase 1	6303	1.72404
Cxcl5	chemokine (C-X-C motif) ligand 5	6372	8.44377
Sdc4	syndecan 4	6385	1.9086
Sfrp1	secreted frizzled-related protein 1	6422	6.6264
Slit3	slit homolog 3 (Drosophila)	6586	2.37588
Sparc	secreted acidic cysteine rich glycoprotein	6678	2.55638
Thbs1	thrombospondin 1	7057	6.74174
Thbs2	thrombospondin 2	7058	2.9399
Thy1	thymus cell antigen 1, theta	7070	3.26885
Timp1	tissue inhibitor of metalloproteinase 1	7076	3.36853
Pdlim4	PDZ and LIM domain 4	8572	1.61575
Edil3	EGF-like repeats and discoidin I-like domains 3	10085	3.20452
Basp1	brain abundant, membrane attached signal protein 1	10409	2.64617
Fbln5	fibulin 5	10516	2.03085
Fermt2	fermitin family homolog 2 (Drosophila)	10979	1.94822
Fstl1	follistatin-like 1	11167	3.33891
Cadm1	cell adhesion molecule 1	23705	2.98067
Grem1	gremlin 1	26585	5.91987
Efemp2	epidermal growth factor-containing fibulin-like extracellular matrix protein 2	30008	1.80856
Tnfrsf12a	tumor necrosis factor receptor superfamily, member 12a	51330	3.58597
Lepre1	leprecan 1	64175	2.17695
Lama1	laminin, alpha 1	284217	4.8603
path_num	28	path_term	HALLMARK_KRAS_SIGNALING_UP	number_of_genes	192	number_hot_genes	41	Pvalue	7.338e-09
Adam8	a disintegrin and metallopeptidase domain 8	101	3.16722
Aldh1a3	aldehyde dehydrogenase family 1, subfamily A3	220	12.958
Arg1	arginase, liver	383	4.37739
Btc	betacellulin, epidermal growth factor family member	685	4.39985
Car2	carbonic anhydrase 2	760	3.5281
Cidea	cell death-inducing DNA fragmentation factor, alpha subunit-like effector A	1149	7.19063
Cpe	carboxypeptidase E	1363	3.91515
Ereg	epiregulin	2069	5.78759
F13a1	coagulation factor XIII, A1 subunit	2162	4.83394
Gabra3	gamma-aminobutyric acid (GABA) A receptor, subunit alpha 3	2556	5.00299
Cfh	complement component factor h	3075	6.34886
Hsd11b1	hydroxysteroid 11-beta dehydrogenase 1	3290	3.62703
Igfbp3	insulin-like growth factor binding protein 3	3486	3.62066
Il1b	interleukin 1 beta	3553	4.5894
Kif5c	kinesin family member 5C	3800	5.31582
Mmp9	matrix metallopeptidase 9	4318	2.87706
Mmp10	matrix metallopeptidase 10	4319	13.332
Pecam1	platelet/endothelial cell adhesion molecule 1	5175	1.76851
Plaur	plasminogen activator, urokinase receptor	5329	2.60305
Prrx1	paired related homeobox 1	5396	2.29908
Ptgs2	prostaglandin-endoperoxide synthase 2	5743	12.5827
Rgs16	regulator of G-protein signaling 16	6004	2.58278
Tfpi	tissue factor pathway inhibitor	7035	3.54265
Sparcl1	SPARC-like 1	8404	1.66314
Il1rl2	interleukin 1 receptor-like 2	8808	2.42089
Aldh1a2	aldehyde dehydrogenase family 1, subfamily A2	8854	7.39789
Ammecr1	Alport syndrome, mental retardation, midface hypoplasia and elliptocytosis chromosomal region gene 1	9949	2.277
Spon1	spondin 1, (f-spondin) extracellular matrix protein	10418	3.95274
Sdccag8	serologically defined colon cancer antigen 8	10806	1.82336
Anxa10	annexin A10	11199	136.566
Btbd3	BTB (POZ) domain containing 3	22903	1.53878
Adamdec1	ADAM-like, decysin 1	27299	1.59604
G0s2	G0/G1 switch gene 2	50486	2.13976
Angptl4	angiopoietin-like 4	51129	2.36701
Zfp639	zinc finger protein 639	51193	1.69314
Gprc5b	G protein-coupled receptor, family C, group 5, member B	51704	7.14489
Ccser2	coiled-coil serine rich 2	54462	1.64359
Mtmr10	myotubularin related protein 10	54893	3.93392
Eltd1	EGF, latrophilin seven transmembrane domain containing 1	64123	2.13184
Cbr4	carbonyl reductase 4	84869	1.39422
Il33	interleukin 33	90865	5.69195
path_num	21	path_term	HALLMARK_HYPOXIA	number_of_genes	189	number_hot_genes	36	Pvalue	1.148e-06
Cp	ceruloplasmin	1356	3.47309
Ctgf	connective tissue growth factor	1490	10.1178
Dcn	decorin	1634	2.45391
Efna3	ephrin A3	1944	1.64292
F3	coagulation factor III	2152	6.81311
Gbe1	glucan (1,4-alpha-), branching enzyme 1	2632	2.94107
Hoxb9	homeobox B9	3219	1.33243
Igfbp3	insulin-like growth factor binding protein 3	3486	3.62066
Cyr61	cysteine rich protein 61	3491	3.5052
Il6	interleukin 6	3569	13.804
Lox	lysyl oxidase	4015	15.1622
Nfil3	nuclear factor, interleukin 3, regulated	4783	1.6601
P4ha1	procollagen-proline, 2-oxoglutarate 4-dioxygenase (proline 4-hydroxylase), alpha 1 polypeptide	5033	2.9872
Serpine1	serine (or cysteine) peptidase inhibitor, clade E, member 1	5054	9.78103
Pam	peptidylglycine alpha-amidating monooxygenase	5066	2.93675
Pgf	placental growth factor	5228	1.98666
Plaur	plasminogen activator, urokinase receptor	5329	2.60305
Ppp1r3c	protein phosphatase 1, regulatory (inhibitor) subunit 3C	5507	5.83269
Sdc2	syndecan 2	6383	2.37112
Sdc4	syndecan 4	6385	1.9086
Stc1	stanniocalcin 1	6781	8.24043
Sap30	sin3 associated polypeptide	8819	1.89298
P4ha2	procollagen-proline, 2-oxoglutarate 4-dioxygenase (proline 4-hydroxylase), alpha II polypeptide	8974	2.7953
Hs3st1	heparan sulfate (glucosamine) 3-O-sulfotransferase 1	9957	2.06882
Zfp292	zinc finger protein 292	23036	1.42692
Prdx5	peroxiredoxin 5	25824	1.64444
Tiparp	TCDD-inducible poly(ADP-ribose) polymerase	25976	1.58814
Wsb1	WD repeat and SOCS box-containing 1	26118	1.54782
Angptl4	angiopoietin-like 4	51129	2.36701
Errfi1	ERBB receptor feedback inhibitor 1	54206	1.99747
Klhl24	kelch-like 24	54800	1.74847
Tmem45a	transmembrane protein 45a	55076	3.18662
Lxn	latexin	56925	1.62802
Ackr3	atypical chemokine receptor 3	57007	1.9814
Prkcdbp	protein kinase C, delta binding protein	112464	2.64713
Ptrf	polymerase I and transcript release factor	284119	2.28524
path_num	9	path_term	HALLMARK_COAGULATION	number_of_genes	126	number_hot_genes	27	Pvalue	2.447e-06
Bmp1	bone morphogenetic protein 1	649	2.37176
Cd9	CD9 antigen	928	1.53789
Ctse	cathepsin E	1510	7.87378
Ctsh	cathepsin H	1512	2.06508
Ctsk	cathepsin K	1513	3.14648
Ctsl	cathepsin L	1515	3.43399
F3	coagulation factor III	2152	6.81311
Fbn1	fibrillin 1	2200	3.14172
Cfh	complement component factor h	3075	6.34886
Hpn	hepsin	3249	1.60134
Mmp2	matrix metallopeptidase 2	4313	3.59841
Mmp3	matrix metallopeptidase 3	4314	7.8565
Mmp8	matrix metallopeptidase 8	4317	30.8126
Mmp9	matrix metallopeptidase 9	4318	2.87706
Mmp10	matrix metallopeptidase 10	4319	13.332
Mmp14	matrix metallopeptidase 14 (membrane-inserted)	4323	1.83935
Furin	furin (paired basic amino acid cleaving enzyme)	5045	2.21377
Serpine1	serine (or cysteine) peptidase inhibitor, clade E, member 1	5054	9.78103
Pecam1	platelet/endothelial cell adhesion molecule 1	5175	1.76851
Pf4	platelet factor 4	5196	5.22957
S100a1	S100 calcium binding protein A1	6271	2.33165
S100a13	S100 calcium binding protein A13	6284	2.07808
Sparc	secreted acidic cysteine rich glycoprotein	6678	2.55638
Thbs1	thrombospondin 1	7057	6.74174
Timp1	tissue inhibitor of metalloproteinase 1	7076	3.36853
Adam9	a disintegrin and metallopeptidase domain 9 (meltrin gamma)	8754	2.61985
Iscu	IscU iron-sulfur cluster scaffold homolog (E. coli)	23479	1.91346
path_num	44	path_term	HALLMARK_TNFA_SIGNALING_VIA_NFKB	number_of_genes	189	number_hot_genes	35	Pvalue	3.151e-06
Areg	amphiregulin	374	6.39953
Ccnd1	cyclin D1	595	2.14442
Cd44	CD44 antigen	960	2.71205
Cebpd	CCAAT/enhancer binding protein (C/EBP), delta	1052	2.73572
Edn1	endothelin 1	1906	3.61948
F3	coagulation factor III	2152	6.81311
Cxcl1	chemokine (C-X-C motif) ligand 1	2920	3.21007
Cxcl2	chemokine (C-X-C motif) ligand 2	2921	5.5763
Hes1	hairy and enhancer of split 1 (Drosophila)	3280	1.46223
Tnc	tenascin C	3371	4.90684
Cyr61	cysteine rich protein 61	3491	3.5052
Il1a	interleukin 1 alpha	3552	22.9824
Il1b	interleukin 1 beta	3553	4.5894
Il6	interleukin 6	3569	13.804
Tnfrsf9	tumor necrosis factor receptor superfamily, member 9	3604	4.88884
Nfil3	nuclear factor, interleukin 3, regulated	4783	1.6601
Nr4a2	nuclear receptor subfamily 4, group A, member 2	4929	2.83376
Serpine1	serine (or cysteine) peptidase inhibitor, clade E, member 1	5054	9.78103
Serpinb8	serine (or cysteine) peptidase inhibitor, clade B, member 8	5271	1.82733
Plaur	plasminogen activator, urokinase receptor	5329	2.60305
Ptgs2	prostaglandin-endoperoxide synthase 2	5743	12.5827
Sat1	spermidine/spermine N1-acetyl transferase 1	6303	1.72404
Cxcl5	chemokine (C-X-C motif) ligand 5	6372	8.44377
Sdc4	syndecan 4	6385	1.9086
Sgk1	serum/glucocorticoid regulated kinase 1	6446	4.2319
Tnfaip6	tumor necrosis factor alpha induced protein 6	7130	2.36344
Btg2	B cell translocation gene 2, anti-proliferative	7832	1.57763
Fosl1	fos-like antigen 1	8061	3.40262
Tsc22d1	TSC22 domain family, member 1	8848	1.75478
Dnajb4	DnaJ (Hsp40) homolog, subfamily B, member 4	11080	1.86044
Clcf1	cardiotrophin-like cytokine factor 1	23529	1.7809
Tiparp	TCDD-inducible poly(ADP-ribose) polymerase	25976	1.58814
G0s2	G0/G1 switch gene 2	50486	2.13976
Ackr3	atypical chemokine receptor 3	57007	1.9814
Spsb1	splA/ryanodine receptor domain and SOCS box containing 1	80176	1.866
path_num	46	path_term	HALLMARK_UV_RESPONSE_DN	number_of_genes	141	number_hot_genes	28	Pvalue	7.615e-06
Amph	amphiphysin	273	2.57872
Bdnf	brain derived neurotrophic factor	627	1.78618
Col1a2	collagen, type I, alpha 2	1278	2.8756
Col3a1	collagen, type III, alpha 1	1281	2.92568
Col5a2	collagen, type V, alpha 2	1290	3.81386
F3	coagulation factor III	2152	6.81311
Efemp1	epidermal growth factor-containing fibulin-like extracellular matrix protein 1	2202	4.96978
Gcnt1	glucosaminyl (N-acetyl) transferase 1, core 2	2650	2.90791
Gja1	gap junction protein, alpha 1	2697	2.63808
Grk5	G protein-coupled receptor kinase 5	2869	3.43541
Igfbp5	insulin-like growth factor binding protein 5	3488	5.13278
Cyr61	cysteine rich protein 61	3491	3.5052
Ltbp1	latent transforming growth factor beta binding protein 1	4052	2.41857
Map1b	microtubule-associated protein 1B	4131	2.41354
Abcc1	ATP-binding cassette, sub-family C (CFTR/MRP), member 1	4363	1.43717
Nfib	nuclear factor I/B	4781	1.67953
Serpine1	serine (or cysteine) peptidase inhibitor, clade E, member 1	5054	9.78103
Prkar2b	protein kinase, cAMP dependent regulatory, type II beta	5577	3.22093
Rgs4	regulator of G-protein signaling 4	5999	3.20497
Sdc2	syndecan 2	6383	2.37112
Tfpi	tissue factor pathway inhibitor	7035	3.54265
Cdc42bpa	CDC42 binding protein kinase alpha	8476	1.59686
Pik3r3	phosphatidylinositol 3 kinase, regulatory subunit, polypeptide 3 (p55)	8503	2.32024
Pias3	protein inhibitor of activated STAT 3	10401	2.00048
Fbln5	fibulin 5	10516	2.03085
Rbpms	RNA binding protein gene with multiple splicing	11030	1.93503
Mios	missing oocyte, meiosis regulator, homolog (Drosophila)	54468	1.62234
Nek7	NIMA (never in mitosis gene a)-related expressed kinase 7	140609	1.60167
path_num	3	path_term	HALLMARK_ANGIOGENESIS	number_of_genes	36	number_hot_genes	12	Pvalue	1.544e-05
Col3a1	collagen, type III, alpha 1	1281	2.92568
Col5a2	collagen, type V, alpha 2	1290	3.81386
Vcan	versican	1462	4.38818
Fgfr1	fibroblast growth factor receptor 1	2260	2.63581
Kcnj8	potassium inwardly-rectifying channel, subfamily J, member 8	3764	3.58745
Lrpap1	low density lipoprotein receptor-related protein associated protein 1	4043	1.76685
Pf4	platelet factor 4	5196	5.22957
Cxcl5	chemokine (C-X-C motif) ligand 5	6372	8.44377
Stc1	stanniocalcin 1	6781	8.24043
Timp1	tissue inhibitor of metalloproteinase 1	7076	3.36853
Fstl1	follistatin-like 1	11167	3.33891
Tnfrsf21	tumor necrosis factor receptor superfamily, member 21	27242	2.16257
path_num	24	path_term	HALLMARK_INFLAMMATORY_RESPONSE	number_of_genes	189	number_hot_genes	32	Pvalue	5.287e-05
Bdkrb1	bradykinin receptor, beta 1	623	3.20111
Edn1	endothelin 1	1906	3.61948
Ereg	epiregulin	2069	5.78759
F3	coagulation factor III	2152	6.81311
Gabbr1	gamma-aminobutyric acid (GABA) B receptor, 1	2550	2.32312
Hpn	hepsin	3249	1.60134
Il1a	interleukin 1 alpha	3552	22.9824
Il1b	interleukin 1 beta	3553	4.5894
Il1r1	interleukin 1 receptor, type I	3554	7.25029
Il4ra	interleukin 4 receptor, alpha	3566	2.00391
Il6	interleukin 6	3569	13.804
Tnfrsf9	tumor necrosis factor receptor superfamily, member 9	3604	4.88884
Itga5	integrin alpha 5 (fibronectin receptor alpha)	3678	2.19852
Mmp14	matrix metallopeptidase 14 (membrane-inserted)	4323	1.83935
Ndp	Norrie disease (pseudoglioma) (human)	4693	2.6955
Osm	oncostatin M	5008	3.97772
P2rx4	purinergic receptor P2X, ligand-gated ion channel 4	5025	1.84463
Serpine1	serine (or cysteine) peptidase inhibitor, clade E, member 1	5054	9.78103
Plaur	plasminogen activator, urokinase receptor	5329	2.60305
Rgs16	regulator of G-protein signaling 16	6004	2.58278
Ros1	Ros1 proto-oncogene	6098	4.97711
Cxcl5	chemokine (C-X-C motif) ligand 5	6372	8.44377
Timp1	tissue inhibitor of metalloproteinase 1	7076	3.36853
Tnfaip6	tumor necrosis factor alpha induced protein 6	7130	2.36344
Btg2	B cell translocation gene 2, anti-proliferative	7832	1.57763
Il18rap	interleukin 18 receptor accessory protein	8807	10.4048
Il18r1	interleukin 18 receptor 1	8809	5.96932
Osmr	oncostatin M receptor	9180	2.3858
Calcrl	calcitonin receptor-like	10203	3.22196
Pdpn	podoplanin	10630	2.68674
Prok2	prokineticin 2	60675	1.77832
Rnf144b	ring finger protein 144B	255488	3.77983
path_num	22	path_term	HALLMARK_IL2_STAT5_SIGNALING	number_of_genes	193	number_hot_genes	30	Pvalue	0.0004177
Alcam	activated leukocyte cell adhesion molecule	214	1.64031
Car2	carbonic anhydrase 2	760	3.5281
Casp3	caspase 3	836	2.82962
Cd44	CD44 antigen	960	2.71205
Ecm1	extracellular matrix protein 1	1893	2.86077
Gpx4	glutathione peroxidase 4	2879	2.17256
Il4ra	interleukin 4 receptor, alpha	3566	2.00391
Tnfrsf9	tumor necrosis factor receptor superfamily, member 9	3604	4.88884
Nfil3	nuclear factor, interleukin 3, regulated	4783	1.6601
Nt5e	5' nucleotidase, ecto	4907	5.10736
P2rx4	purinergic receptor P2X, ligand-gated ion channel 4	5025	1.84463
P4ha1	procollagen-proline, 2-oxoglutarate 4-dioxygenase (proline 4-hydroxylase), alpha 1 polypeptide	5033	2.9872
Furin	furin (paired basic amino acid cleaving enzyme)	5045	2.21377
Rgs16	regulator of G-protein signaling 16	6004	2.58278
S100a1	S100 calcium binding protein A1	6271	2.33165
Selp	selectin, platelet	6403	4.1515
Il1r2	interleukin 1 receptor, type II	7850	9.79754
Tnfsf11	tumor necrosis factor (ligand) superfamily, member 11	8600	4.23626
Il18r1	interleukin 18 receptor 1	8809	5.96932
Il1rl1	interleukin 1 receptor-like 1	9173	4.23175
Dhrs3	dehydrogenase/reductase (SDR family) member 3	9249	2.65933
Gsto1	glutathione S-transferase omega 1	9446	1.82727
Akap2	A kinase (PRKA) anchor protein 2	11217	1.53716
Tnfrsf21	tumor necrosis factor receptor superfamily, member 21	27242	2.16257
Twsg1	twisted gastrulation homolog 1 (Drosophila)	57045	1.955
Wls	wntless homolog (Drosophila)	79971	2.88831
Glipr2	GLI pathogenesis-related 2	152007	3.13496
Spred2	sprouty-related, EVH1 domain containing 2	200734	2.09603
N6amt2	N-6 adenine-specific DNA methyltransferase 2 (putative)	221143	1.41488
Mettl20	methyltransferase like 20	254013	2.11906
path_num	4	path_term	HALLMARK_APICAL_JUNCTION	number_of_genes	191	number_hot_genes	29	Pvalue	0.0007621
Bmp1	bone morphogenetic protein 1	649	2.37176
Cd34	CD34 antigen	947	1.68612
Cdh11	cadherin 11	1009	3.9172
Cnn2	calponin 2	1265	2.14763
Vcan	versican	1462	4.38818
Fbn1	fibrillin 1	2200	3.14172
Gnai1	guanine nucleotide binding protein (G protein), alpha inhibiting 1	2770	2.39408
Itga3	integrin alpha 3	3675	2.00317
Itgb1	integrin beta 1 (fibronectin receptor beta)	3688	1.59062
Lama3	laminin, alpha 3	3909	2.22341
Lamc2	laminin, gamma 2	3918	3.61858
Mmp2	matrix metallopeptidase 2	4313	3.59841
Mmp9	matrix metallopeptidase 9	4318	2.87706
Tnfrsf11b	tumor necrosis factor receptor superfamily, member 11b (osteoprotegerin)	4982	4.30031
Pecam1	platelet/endothelial cell adhesion molecule 1	5175	1.76851
Plcg1	phospholipase C, gamma 1	5335	1.47433
Rasa1	RAS p21 protein activator 1	5921	1.58769
Rsu1	Ras suppressor protein 1	6251	1.89533
Shc1	src homology 2 domain-containing transforming protein C1	6464	1.40888
Thy1	thymus cell antigen 1, theta	7070	3.26885
Tspan4	tetraspanin 4	7106	1.90876
Pik3r3	phosphatidylinositol 3 kinase, regulatory subunit, polypeptide 3 (p55)	8503	2.32024
Adam9	a disintegrin and metallopeptidase domain 9 (meltrin gamma)	8754	2.61985
Mpzl1	myelin protein zero-like 1	9019	1.72129
Sorbs3	sorbin and SH3 domain containing 3	10174	1.56845
Cldn18	claudin 18	51208	1.99681
Jam3	junction adhesion molecule 3	83700	1.85898
Nexn	nexilin	91624	1.9409
Layn	layilin	143903	1.82939
path_num	10	path_term	HALLMARK_COMPLEMENT	number_of_genes	173	number_hot_genes	26	Pvalue	0.001616
Anxa5	annexin A5	308	1.94022
Car2	carbonic anhydrase 2	760	3.5281
Casp3	caspase 3	836	2.82962
Cdh13	cadherin 13	1012	3.10582
Col4a2	collagen, type IV, alpha 2	1284	2.09622
Cp	ceruloplasmin	1356	3.47309
Ctsd	cathepsin D	1509	1.44144
Ctsh	cathepsin H	1512	2.06508
Ctsl	cathepsin L	1515	3.43399
F3	coagulation factor III	2152	6.81311
F5	coagulation factor V	2153	11.8733
Cfh	complement component factor h	3075	6.34886
Il6	interleukin 6	3569	13.804
Ltf	lactotransferrin	4057	12.0106
Mmp8	matrix metallopeptidase 8	4317	30.8126
Mmp13	matrix metallopeptidase 13	4322	5.24566
Mmp14	matrix metallopeptidase 14 (membrane-inserted)	4323	1.83935
Serpine1	serine (or cysteine) peptidase inhibitor, clade E, member 1	5054	9.78103
Plaur	plasminogen activator, urokinase receptor	5329	2.60305
Prcp	prolylcarboxypeptidase (angiotensinase C)	5547	1.85129
S100a9	S100 calcium binding protein A9 (calgranulin B)	6280	11.5624
S100a13	S100 calcium binding protein A13	6284	2.07808
Timp1	tissue inhibitor of metalloproteinase 1	7076	3.36853
Pla2g7	phospholipase A2, group VII (platelet-activating factor acetylhydrolase, plasma)	7941	2.31152
Adam9	a disintegrin and metallopeptidase domain 9 (meltrin gamma)	8754	2.61985
Dock4	dedicator of cytokinesis 4	9732	2.75833
path_num	36	path_term	HALLMARK_P53_PATHWAY	number_of_genes	192	number_hot_genes	28	Pvalue	0.001737
Bax	BCL2-associated X protein	581	1.69247
Ccng1	cyclin G1	900	2.6452
Cdh13	cadherin 13	1012	3.10582
Cdkn2a	cyclin-dependent kinase inhibitor 2A	1029	2.03607
Ctsd	cathepsin D	1509	1.44144
F2r	coagulation factor II (thrombin) receptor	2149	3.77582
Il1a	interleukin 1 alpha	3552	22.9824
Tm4sf1	transmembrane 4 superfamily member 1	4071	2.27558
Notch1	notch 1	4851	1.47161
Serpinb5	serine (or cysteine) peptidase inhibitor, clade B, member 5	5268	1.7176
Pmm1	phosphomannomutase 1	5372	3.77795
Rgs16	regulator of G-protein signaling 16	6004	2.58278
Rpl18	ribosomal protein L18	6141	1.41491
Sat1	spermidine/spermine N1-acetyl transferase 1	6303	1.72404
Xpc	xeroderma pigmentosum, complementation group C	7508	1.33193
Btg2	B cell translocation gene 2, anti-proliferative	7832	1.57763
Ppm1d	protein phosphatase 1D magnesium-dependent, delta isoform	8493	1.77514
Vamp8	vesicle-associated membrane protein 8	8673	1.65757
Ctsf	cathepsin F	8722	1.81535
Tsc22d1	TSC22 domain family, member 1	8848	1.75478
Slc19a2	solute carrier family 19 (thiamine transporter), member 2	10560	2.52643
Wwp1	WW domain containing E3 ubiquitin protein ligase 1	11059	1.69826
Iscu	IscU iron-sulfur cluster scaffold homolog (E. coli)	23479	1.91346
Phlda3	pleckstrin homology-like domain, family A, member 3	23612	2.22666
Dcxr	dicarbonyl L-xylulose reductase	51181	2.39115
Ip6k2	inositol hexaphosphate kinase 2	51447	1.72802
Tspyl2	TSPY-like 2	64061	2.11559
Zmat3	zinc finger matrin type 3	64393	2.24743
path_num	23	path_term	HALLMARK_IL6_JAK_STAT3_SIGNALING	number_of_genes	81	number_hot_genes	15	Pvalue	0.001996
Cd9	CD9 antigen	928	1.53789
Cd44	CD44 antigen	960	2.71205
Ccr1	chemokine (C-C motif) receptor 1	1230	2.88373
Cxcl2	chemokine (C-X-C motif) ligand 2	2921	5.5763
Il1b	interleukin 1 beta	3553	4.5894
Il1r1	interleukin 1 receptor, type I	3554	7.25029
Il4ra	interleukin 4 receptor, alpha	3566	2.00391
Il6	interleukin 6	3569	13.804
Lepr	leptin receptor	3953	3.54836
Pf4	platelet factor 4	5196	5.22957
Il1r2	interleukin 1 receptor, type II	7850	9.79754
Il18r1	interleukin 18 receptor 1	8809	5.96932
Osmr	oncostatin M receptor	9180	2.3858
Tnfrsf21	tumor necrosis factor receptor superfamily, member 21	27242	2.16257
Tnfrsf12a	tumor necrosis factor receptor superfamily, member 12a	51330	3.58597
path_num	8	path_term	HALLMARK_CHOLESTEROL_HOMEOSTASIS	number_of_genes	72	number_hot_genes	11	Pvalue	0.02985
Alcam	activated leukocyte cell adhesion molecule	214	1.64031
Anxa5	annexin A5	308	1.94022
Cd9	CD9 antigen	928	1.53789
Chka	choline kinase alpha	1119	2.11715
Ctnnb1	catenin (cadherin associated protein), beta 1	1499	1.34087
Gnai1	guanine nucleotide binding protein (G protein), alpha inhibiting 1	2770	2.39408
Nfil3	nuclear factor, interleukin 3, regulated	4783	1.6601
Plaur	plasminogen activator, urokinase receptor	5329	2.60305
Tnfrsf12a	tumor necrosis factor receptor superfamily, member 12a	51330	3.58597
Errfi1	ERBB receptor feedback inhibitor 1	54206	1.99747
Gpx8	glutathione peroxidase 8 (putative)	493869	4.2896
path_num	33	path_term	HALLMARK_MYOGENESIS	number_of_genes	192	number_hot_genes	23	Pvalue	0.03841
Bag1	BCL2-associated athanogene 1	573	2.02571
Cdh13	cadherin 13	1012	3.10582
Chrnb1	cholinergic receptor, nicotinic, beta polypeptide 1 (muscle)	1140	4.64825
Cnn3	calponin 3, acidic	1266	2.9794
Col3a1	collagen, type III, alpha 1	1281	2.92568
Col4a2	collagen, type IV, alpha 2	1284	2.09622
Fgf2	fibroblast growth factor 2	2247	1.45576
Fhl1	four and a half LIM domains 1	2273	2.00971
Igf1	insulin-like growth factor 1	3479	5.44311
Igfbp3	insulin-like growth factor binding protein 3	3486	3.62066
Igfbp7	insulin-like growth factor binding protein 7	3490	1.90889
Itgb1	integrin beta 1 (fibronectin receptor beta)	3688	1.59062
Lama2	laminin, alpha 2	3908	3.49559
Ablim1	actin-binding LIM protein 1	3983	1.56812
Foxo4	forkhead box O4	4303	1.65023
Notch1	notch 1	4851	1.47161
Ppp1r3c	protein phosphatase 1, regulatory (inhibitor) subunit 3C	5507	5.83269
Sparc	secreted acidic cysteine rich glycoprotein	6678	2.55638
Pdlim7	PDZ and LIM domain 7	9260	1.82799
Sorbs3	sorbin and SH3 domain containing 3	10174	1.56845
Fst	follistatin	10468	3.12897
Mras	muscle and microspikes RAS	22808	1.76189
Wwtr1	WW domain containing transcription regulator 1	25937	3.83967
path_num	6	path_term	HALLMARK_APOPTOSIS	number_of_genes	155	number_hot_genes	19	Pvalue	0.04613
Bax	BCL2-associated X protein	581	1.69247
Ccnd1	cyclin D1	595	2.14442
Casp3	caspase 3	836	2.82962
Cd44	CD44 antigen	960	2.71205
Ctnnb1	catenin (cadherin associated protein), beta 1	1499	1.34087
Dcn	decorin	1634	2.45391
Ereg	epiregulin	2069	5.78759
F2r	coagulation factor II (thrombin) receptor	2149	3.77582
Gpx4	glutathione peroxidase 4	2879	2.17256
Hgf	hepatocyte growth factor	3082	4.71629
Il1a	interleukin 1 alpha	3552	22.9824
Il1b	interleukin 1 beta	3553	4.5894
Il6	interleukin 6	3569	13.804
Mmp2	matrix metallopeptidase 2	4313	3.59841
Sat1	spermidine/spermine N1-acetyl transferase 1	6303	1.72404
Timp1	tissue inhibitor of metalloproteinase 1	7076	3.36853
Btg2	B cell translocation gene 2, anti-proliferative	7832	1.57763
Pea15a	phosphoprotein enriched in astrocytes 15A	8682	2.28638
Tnfrsf12a	tumor necrosis factor receptor superfamily, member 12a	51330	3.58597
path_num	43	path_term	HALLMARK_TGF_BETA_SIGNALING	number_of_genes	52	number_hot_genes	8	Pvalue	0.0569
Acvr1	activin A receptor, type 1	90	1.89826
Ctnnb1	catenin (cadherin associated protein), beta 1	1499	1.34087
Fkbp1a	FK506 binding protein 1a	2280	1.63068
Fnta	farnesyltransferase, CAAX box, alpha	2339	1.68886
Furin	furin (paired basic amino acid cleaving enzyme)	5045	2.21377
Serpine1	serine (or cysteine) peptidase inhibitor, clade E, member 1	5054	9.78103
Thbs1	thrombospondin 1	7057	6.74174
Wwtr1	WW domain containing transcription regulator 1	25937	3.83967
path_num	47	path_term	HALLMARK_UV_RESPONSE_UP	number_of_genes	143	number_hot_genes	17	Pvalue	0.07165
Slc25a4	solute carrier family 25 (mitochondrial carrier, adenine nucleotide translocator), member 4	291	2.39669
Aqp3	aquaporin 3	360	4.35936
Car2	carbonic anhydrase 2	760	3.5281
Casp3	caspase 3	836	2.82962
Chka	choline kinase alpha	1119	2.11715
Ctsl	cathepsin L	1515	3.43399
E2f5	E2F transcription factor 5	1875	2.15068
Cxcl1	chemokine (C-X-C motif) ligand 1	2920	3.21007
Il6	interleukin 6	3569	13.804
Mmp14	matrix metallopeptidase 14 (membrane-inserted)	4323	1.83935
Furin	furin (paired basic amino acid cleaving enzyme)	5045	2.21377
Ppat	phosphoribosyl pyrophosphate amidotransferase	5471	2.38893
Ppp1r2	protein phosphatase 1, regulatory (inhibitor) subunit 2	5504	1.77861
Hspa13	heat shock protein 70 family, member 13	6782	1.5177
Urod	uroporphyrinogen decarboxylase	7389	1.5449
Btg2	B cell translocation gene 2, anti-proliferative	7832	1.57763
Ggh	gamma-glutamyl hydrolase	8836	10.4557
path_num	34	path_term	HALLMARK_NOTCH_SIGNALING	number_of_genes	30	number_hot_genes	5	Pvalue	0.09142
Ccnd1	cyclin D1	595	2.14442
Hes1	hairy and enhancer of split 1 (Drosophila)	3280	1.46223
Notch1	notch 1	4851	1.47161
Fzd1	frizzled homolog 1 (Drosophila)	8321	2.40588
Sap30	sin3 associated polypeptide	8819	1.89298
path_num	5	path_term	HALLMARK_APICAL_SURFACE	number_of_genes	40	number_hot_genes	6	Pvalue	0.1017
Efna5	ephrin A5	1946	4.73505
Flot2	flotillin 2	2319	1.93561
Mal	myelin and lymphocyte protein, T cell differentiation protein	4118	5.14829
Plaur	plasminogen activator, urokinase receptor	5329	2.60305
Thy1	thymus cell antigen 1, theta	7070	3.26885
Scube1	signal peptide, CUB domain, EGF-like 1	80274	1.97513
path_num	40	path_term	HALLMARK_PROTEIN_SECRETION	number_of_genes	91	number_hot_genes	11	Pvalue	0.1182
Cav2	caveolin 2	858	6.00921
Cd63	CD63 antigen	967	1.45062
Galc	galactosylceramidase	2581	3.0736
Pam	peptidylglycine alpha-amidating monooxygenase	5066	2.93675
Rab2a	RAB2A, member RAS oncogene family	5862	1.37896
Rab5a	RAB5A, member RAS oncogene family	5868	1.4496
Scamp1	secretory carrier membrane protein 1	9522	1.67664
Vps4b	vacuolar protein sorting 4b (yeast)	9525	1.30691
Arfip1	ADP-ribosylation factor interacting protein 1	27236	1.62827
Tmx1	thioredoxin-related transmembrane protein 1	81542	1.61313
Sgms1	sphingomyelin synthase 1	259230	1.46331
path_num	15	path_term	HALLMARK_ESTROGEN_RESPONSE_LATE	number_of_genes	189	number_hot_genes	20	Pvalue	0.1337
Areg	amphiregulin	374	6.39953
Bag1	BCL2-associated athanogene 1	573	2.02571
Ccnd1	cyclin D1	595	2.14442
Car2	carbonic anhydrase 2	760	3.5281
Cd9	CD9 antigen	928	1.53789
Cd44	CD44 antigen	960	2.71205
Cpe	carboxypeptidase E	1363	3.91515
Foxc1	forkhead box C1	2296	2.23443
Lamc2	laminin, gamma 2	3918	3.61858
Ltf	lactotransferrin	4057	12.0106
Prkar2b	protein kinase, cAMP dependent regulatory, type II beta	5577	3.22093
S100a9	S100 calcium binding protein A9 (calgranulin B)	6280	11.5624
Sgk1	serum/glucocorticoid regulated kinase 1	6446	4.2319
Dynlt3	dynein light chain Tctex-type 3	6990	1.4923
Tff1	trefoil factor 1	7031	14.5449
Nrip1	nuclear receptor interacting protein 1	8204	1.50861
Ptges	prostaglandin E synthase	9536	2.14493
Rnaseh2a	ribonuclease H2, large subunit	10535	1.42637
Myof	myoferlin	26509	2.86676
Dcxr	dicarbonyl L-xylulose reductase	51181	2.39115
path_num	2	path_term	HALLMARK_ANDROGEN_RESPONSE	number_of_genes	94	number_hot_genes	11	Pvalue	0.1393
Aldh1a3	aldehyde dehydrogenase family 1, subfamily A3	220	12.958
Azgp1	alpha-2-glycoprotein 1, zinc	563	2.30275
Ccnd1	cyclin D1	595	2.14442
Cdk6	cyclin-dependent kinase 6	1021	2.7278
Sat1	spermidine/spermine N1-acetyl transferase 1	6303	1.72404
Sgk1	serum/glucocorticoid regulated kinase 1	6446	4.2319
Tsc22d1	TSC22 domain family, member 1	8848	1.75478
Adamts1	a disintegrin-like and metallopeptidase (reprolysin type) with thrombospondin type 1 motif, 1	9510	4.94714
Abcc4	ATP-binding cassette, sub-family C (CFTR/MRP), member 4	10257	2.63368
Gpd1l	glycerol-3-phosphate dehydrogenase 1-like	23171	2.51876
Tmem50a	transmembrane protein 50A	23585	1.58797
path_num	18	path_term	HALLMARK_GLYCOLYSIS	number_of_genes	193	number_hot_genes	20	Pvalue	0.1542
Cd44	CD44 antigen	960	2.71205
Vcan	versican	1462	4.38818
Dcn	decorin	1634	2.45391
Efna3	ephrin A3	1944	1.64292
Ext2	exostoses (multiple) 2	2132	1.46099
Gclc	glutamate-cysteine ligase, catalytic subunit	2729	2.82887
Igfbp3	insulin-like growth factor binding protein 3	3486	3.62066
Nt5e	5' nucleotidase, ecto	4907	5.10736
P4ha1	procollagen-proline, 2-oxoglutarate 4-dioxygenase (proline 4-hydroxylase), alpha 1 polypeptide	5033	2.9872
Pam	peptidylglycine alpha-amidating monooxygenase	5066	2.93675
Plod2	procollagen lysine, 2-oxoglutarate 5-dioxygenase 2	5352	4.51075
Qsox1	quiescin Q6 sulfhydryl oxidase 1	5768	3.19917
Pygl	liver glycogen phosphorylase	5836	2.39641
Sdc2	syndecan 2	6383	2.37112
Stc1	stanniocalcin 1	6781	8.24043
Sap30	sin3 associated polypeptide	8819	1.89298
P4ha2	procollagen-proline, 2-oxoglutarate 4-dioxygenase (proline 4-hydroxylase), alpha II polypeptide	8974	2.7953
Hs2st1	heparan sulfate 2-O-sulfotransferase 1	9653	2.16005
Zfp292	zinc finger protein 292	23036	1.42692
Angptl4	angiopoietin-like 4	51129	2.36701
path_num	19	path_term	HALLMARK_HEDGEHOG_SIGNALING	number_of_genes	36	number_hot_genes	5	Pvalue	0.1638
Cdk6	cyclin-dependent kinase 6	1021	2.7278
Rasa1	RAS p21 protein activator 1	5921	1.58769
Thy1	thymus cell antigen 1, theta	7070	3.26885
Tle3	transducin-like enhancer of split 3, homolog of Drosophila E(spl)	7090	2.25083
Ldb1	LIM domain binding 1	8861	1.51412
path_num	38	path_term	HALLMARK_PEROXISOME	number_of_genes	101	number_hot_genes	11	Pvalue	0.1954
Slc25a4	solute carrier family 25 (mitochondrial carrier, adenine nucleotide translocator), member 4	291	2.39669
Ephx2	epoxide hydrolase 2, cytoplasmic	2053	3.99989
Acsl4	acyl-CoA synthetase long-chain family member 4	2182	2.52007
Dhrs3	dehydrogenase/reductase (SDR family) member 3	9249	2.65933
Itgb1bp1	integrin beta 1 binding protein 1	9270	1.66134
Vps4b	vacuolar protein sorting 4b (yeast)	9525	1.30691
Eci2	enoyl-Coenzyme A delta isomerase 2	10455	1.42151
Slc25a17	solute carrier family 25 (mitochondrial carrier, peroxisomal membrane protein), member 17	10478	1.46628
Sema3c	sema domain, immunoglobulin domain (Ig), short basic domain, secreted, (semaphorin) 3C	10512	2.60118
Cadm1	cell adhesion molecule 1	23705	2.98067
Prdx5	peroxiredoxin 5	25824	1.64444
path_num	1	path_term	HALLMARK_ALLOGRAFT_REJECTION	number_of_genes	181	number_hot_genes	18	Pvalue	0.2162
Cdkn2a	cyclin-dependent kinase inhibitor 2A	1029	2.03607
Ccr1	chemokine (C-C motif) receptor 1	1230	2.88373
Ereg	epiregulin	2069	5.78759
F2r	coagulation factor II (thrombin) receptor	2149	3.77582
Gcnt1	glucosaminyl (N-acetyl) transferase 1, core 2	2650	2.90791
Il1b	interleukin 1 beta	3553	4.5894
Il4ra	interleukin 4 receptor, alpha	3566	2.00391
Il6	interleukin 6	3569	13.804
Il11	interleukin 11	3589	10.6635
Mmp9	matrix metallopeptidase 9	4318	2.87706
Pf4	platelet factor 4	5196	5.22957
Ccl11	chemokine (C-C motif) ligand 11	6356	3.41649
Ccl2	chemokine (C-C motif) ligand 2	6357	3.72971
Thy1	thymus cell antigen 1, theta	7070	3.26885
Timp1	tissue inhibitor of metalloproteinase 1	7076	3.36853
Degs1	degenerative spermatocyte homolog 1 (Drosophila)	8560	2.47924
Il18rap	interleukin 18 receptor accessory protein	8807	10.4048
Socs5	suppressor of cytokine signaling 5	9655	2.98753
path_num	14	path_term	HALLMARK_ESTROGEN_RESPONSE_EARLY	number_of_genes	190	number_hot_genes	18	Pvalue	0.2806
Aqp3	aquaporin 3	360	4.35936
Areg	amphiregulin	374	6.39953
Bag1	BCL2-associated athanogene 1	573	2.02571
Ccnd1	cyclin D1	595	2.14442
Cd44	CD44 antigen	960	2.71205
Foxc1	forkhead box C1	2296	2.23443
Gja1	gap junction protein, alpha 1	2697	2.63808
Hes1	hairy and enhancer of split 1 (Drosophila)	3280	1.46223
Ablim1	actin-binding LIM protein 1	3983	1.56812
Dynlt3	dynein light chain Tctex-type 3	6990	1.4923
Tff1	trefoil factor 1	7031	14.5449
Nrip1	nuclear receptor interacting protein 1	8204	1.50861
Dhrs3	dehydrogenase/reductase (SDR family) member 3	9249	2.65933
Ptges	prostaglandin E synthase	9536	2.14493
Slc19a2	solute carrier family 19 (thiamine transporter), member 2	10560	2.52643
Tiparp	TCDD-inducible poly(ADP-ribose) polymerase	25976	1.58814
Myof	myoferlin	26509	2.86676
Fam134b	family with sequence similarity 134, member B	54463	2.37599
path_num	30	path_term	HALLMARK_MTORC1_SIGNALING	number_of_genes	193	number_hot_genes	18	Pvalue	0.3034
Serpinh1	serine (or cysteine) peptidase inhibitor, clade H, member 1	871	2.25867
Ccng1	cyclin G1	900	2.6452
Cd9	CD9 antigen	928	1.53789
Gbe1	glucan (1,4-alpha-), branching enzyme 1	2632	2.94107
Gclc	glutamate-cysteine ligase, catalytic subunit	2729	2.82887
Igfbp5	insulin-like growth factor binding protein 5	3488	5.13278
Nfil3	nuclear factor, interleukin 3, regulated	4783	1.6601
P4ha1	procollagen-proline, 2-oxoglutarate 4-dioxygenase (proline 4-hydroxylase), alpha 1 polypeptide	5033	2.9872
Plod2	procollagen lysine, 2-oxoglutarate 5-dioxygenase 2	5352	4.51075
Srd5a1	steroid 5 alpha-reductase 1	6715	1.8336
Stc1	stanniocalcin 1	6781	8.24043
Tcea1	transcription elongation factor A (SII) 1	6917	1.36023
Btg2	B cell translocation gene 2, anti-proliferative	7832	1.57763
Pik3r3	phosphatidylinositol 3 kinase, regulatory subunit, polypeptide 3 (p55)	8503	2.32024
Eef1e1	eukaryotic translation elongation factor 1 epsilon 1	9521	1.54402
Polr3g	polymerase (RNA) III (DNA directed) polypeptide G	10622	1.62987
Sec11a	SEC11 homolog A (S. cerevisiae)	23478	1.31619
Atp6v1d	ATPase, H+ transporting, lysosomal V1 subunit D	51382	1.41424
path_num	20	path_term	HALLMARK_HEME_METABOLISM	number_of_genes	182	number_hot_genes	17	Pvalue	0.3082
Add2	adducin 2 (beta)	119	1.59069
Aqp3	aquaporin 3	360	4.35936
Car2	carbonic anhydrase 2	760	3.5281
Ctse	cathepsin E	1510	7.87378
Gclc	glutamate-cysteine ligase, catalytic subunit	2729	2.82887
Bcam	basal cell adhesion molecule	4059	3.88051
Tcea1	transcription elongation factor A (SII) 1	6917	1.36023
Urod	uroporphyrinogen decarboxylase	7389	1.5449
Btg2	B cell translocation gene 2, anti-proliferative	7832	1.57763
P4ha2	procollagen-proline, 2-oxoglutarate 4-dioxygenase (proline 4-hydroxylase), alpha II polypeptide	8974	2.7953
Cir1	corepressor interacting with RBPJ, 1	9541	1.55581
Glrx5	glutaredoxin 5 homolog (S. cerevisiae)	51218	2.71375
Gde1	glycerophosphodiester phosphodiesterase 1	51573	1.89712
Slc25a38	solute carrier family 25, member 38	54977	1.68295
Mospd1	motile sperm domain containing 1	56180	1.42333
Trak2	trafficking protein, kinesin binding 2	66008	1.86544
Nek7	NIMA (never in mitosis gene a)-related expressed kinase 7	140609	1.60167
path_num	49	path_term	HALLMARK_XENOBIOTIC_METABOLISM	number_of_genes	194	number_hot_genes	18	Pvalue	0.3112
Adh5	alcohol dehydrogenase 5 (class III), chi polypeptide	128	2.03902
Aox1	aldehyde oxidase 1	316	1.69882
Arg1	arginase, liver	383	4.37739
Car2	carbonic anhydrase 2	760	3.5281
Ces1d	carboxylesterase 1D	1066	5.70871
Gclc	glutamate-cysteine ligase, catalytic subunit	2729	2.82887
Hsd11b1	hydroxysteroid 11-beta dehydrogenase 1	3290	3.62703
Igf1	insulin-like growth factor 1	3479	5.44311
Il1r1	interleukin 1 receptor, type I	3554	7.25029
Serpine1	serine (or cysteine) peptidase inhibitor, clade E, member 1	5054	9.78103
Pmm1	phosphomannomutase 1	5372	3.77795
Pts	6-pyruvoyl-tetrahydropterin synthase	5805	1.69404
Gsto1	glutathione S-transferase omega 1	9446	1.82727
Ptges	prostaglandin E synthase	9536	2.14493
Pgrmc1	progesterone receptor membrane component 1	10857	1.56208
Fetub	fetuin beta	26998	6.18568
Dcxr	dicarbonyl L-xylulose reductase	51181	2.39115
Dhrs1	dehydrogenase/reductase (SDR family) member 1	115817	2.82524
path_num	48	path_term	HALLMARK_WNT_BETA_CATENIN_SIGNALING	number_of_genes	41	number_hot_genes	4	Pvalue	0.4288
Ctnnb1	catenin (cadherin associated protein), beta 1	1499	1.34087
Gnai1	guanine nucleotide binding protein (G protein), alpha inhibiting 1	2770	2.39408
Notch1	notch 1	4851	1.47161
Fzd1	frizzled homolog 1 (Drosophila)	8321	2.40588
path_num	11	path_term	HALLMARK_DNA_REPAIR	number_of_genes	138	number_hot_genes	11	Pvalue	0.5703
Gpx4	glutathione peroxidase 4	2879	2.17256
Bcam	basal cell adhesion molecule	4059	3.88051
Polr2d	polymerase (RNA) II (DNA directed) polypeptide D	5433	1.91128
Polr2g	polymerase (RNA) II (DNA directed) polypeptide G	5436	1.67633
Taf13	TAF13 RNA polymerase II, TATA box binding protein (TBP)-associated factor	6884	1.72143
Xpc	xeroderma pigmentosum, complementation group C	7508	1.33193
Rnmt	RNA (guanine-7-) methyltransferase	8731	1.60853
Polr1c	polymerase (RNA) I polypeptide C	9533	1.68941
Zwint	ZW10 interactor	11130	2.01927
Rrm2b	ribonucleotide reductase M2 B (TP53 inducible)	50484	1.38945
Nt5c3	5'-nucleotidase, cytosolic III	51251	2.07136
path_num	0	path_term	HALLMARK_ADIPOGENESIS	number_of_genes	191	number_hot_genes	15	Pvalue	0.5919
Atp1b3	ATPase, Na+/K+ transporting, beta 3 polypeptide	483	1.99581
Cdkn2c	cyclin-dependent kinase inhibitor 2C (p18, inhibits CDK4)	1031	2.01862
Cidea	cell death-inducing DNA fragmentation factor, alpha subunit-like effector A	1149	7.19063
Col4a1	collagen, type IV, alpha 1	1282	3.3773
Ephx2	epoxide hydrolase 2, cytoplasmic	2053	3.99989
Gbe1	glucan (1,4-alpha-), branching enzyme 1	2632	2.94107
Gpx4	glutathione peroxidase 4	2879	2.17256
Enpp2	ectonucleotide pyrophosphatase/phosphodiesterase 2	5168	6.66264
Sparcl1	SPARC-like 1	8404	1.66314
Sdpr	serum deprivation response	8436	2.01133
Angptl4	angiopoietin-like 4	51129	2.36701
2016-03-02	mitochondrial amidoxime reducing component 2	54996	1.63896
Mrap	melanocortin 2 receptor accessory protein	56246	6.11801
Rab34	RAB34, member RAS oncogene family	83871	2.08042
Ptrf	polymerase I and transcript release factor	284119	2.28524
path_num	7	path_term	HALLMARK_BILE_ACID_METABOLISM	number_of_genes	109	number_hot_genes	8	Pvalue	0.668
Dio2	deiodinase, iodothyronine, type II	1734	23.6116
Ephx2	epoxide hydrolase 2, cytoplasmic	2053	3.99989
Rbp1	retinol binding protein 1, cellular	5947	5.66277
Cyp7b1	cytochrome P450, family 7, subfamily b, polypeptide 1	9420	2.32532
Abca5	ATP-binding cassette, sub-family A (ABC1), member 5	23461	2.95538
Prdx5	peroxiredoxin 5	25824	1.64444
Pex26	peroxisomal biogenesis factor 26	55670	1.42362
Paox	polyamine oxidase (exo-N4-amino)	196743	5.30832
path_num	41	path_term	HALLMARK_REACTIVE_OXIGEN_SPECIES_PATHWAY	number_of_genes	46	number_hot_genes	3	Pvalue	0.7327
Gclc	glutamate-cysteine ligase, catalytic subunit	2729	2.82887
Gpx4	glutathione peroxidase 4	2879	2.17256
Abcc1	ATP-binding cassette, sub-family C (CFTR/MRP), member 1	4363	1.43717
path_num	45	path_term	HALLMARK_UNFOLDED_PROTEIN_RESPONSE	number_of_genes	107	number_hot_genes	7	Pvalue	0.7752
Ddx10	DEAD (Asp-Glu-Ala-Asp) box polypeptide 10	1662	1.43885
Shc1	src homology 2 domain-containing transforming protein C1	6464	1.40888
Paip1	polyadenylate binding protein-interacting protein 1	10605	1.43397
Sec11a	SEC11 homolog A (S. cerevisiae)	23478	1.31619
Fkbp14	FK506 binding protein 14	55033	2.88863
Dnaja4	DnaJ (Hsp40) homolog, subfamily A, member 4	55466	1.87896
Tspyl2	TSPY-like 2	64061	2.11559
path_num	16	path_term	HALLMARK_FATTY_ACID_METABOLISM	number_of_genes	149	number_hot_genes	10	Pvalue	0.778
Car2	carbonic anhydrase 2	760	3.5281
Cidea	cell death-inducing DNA fragmentation factor, alpha subunit-like effector A	1149	7.19063
Acsl4	acyl-CoA synthetase long-chain family member 4	2182	2.52007
Lgals1	lectin, galactose binding, soluble 1	3956	3.10275
Pts	6-pyruvoyl-tetrahydropterin synthase	5805	1.69404
Acsm3	acyl-CoA synthetase medium-chain family member 3	6296	16.4214
Urod	uroporphyrinogen decarboxylase	7389	1.5449
Eci2	enoyl-Coenzyme A delta isomerase 2	10455	1.42151
G0s2	G0/G1 switch gene 2	50486	2.13976
Serinc1	serine incorporator 1	57515	1.84981
path_num	37	path_term	HALLMARK_PANCREAS_BETA_CELLS	number_of_genes	38	number_hot_genes	2	Pvalue	0.8256
Srp9	signal recognition particle 9	6726	1.47679
Sec11a	SEC11 homolog A (S. cerevisiae)	23478	1.31619
path_num	26	path_term	HALLMARK_INTERFERON_GAMMA_RESPONSE	number_of_genes	175	number_hot_genes	11	Pvalue	0.8498
Casp3	caspase 3	836	2.82962
Cfh	complement component factor h	3075	6.34886
Il4ra	interleukin 4 receptor, alpha	3566	2.00391
Il6	interleukin 6	3569	13.804
Ptgs2	prostaglandin-endoperoxide synthase 2	5743	12.5827
Selp	selectin, platelet	6403	4.1515
Tnfaip6	tumor necrosis factor alpha induced protein 6	7130	2.36344
Vamp8	vesicle-associated membrane protein 8	8673	1.65757
Ifitm2	interferon induced transmembrane protein 2	10581	2.79708
Vamp5	vesicle-associated membrane protein 5	10791	3.90662
Lats2	large tumor suppressor 2	26524	2.01973
path_num	25	path_term	HALLMARK_INTERFERON_ALPHA_RESPONSE	number_of_genes	82	number_hot_genes	4	Pvalue	0.9085
Il4ra	interleukin 4 receptor, alpha	3566	2.00391
Lpar6	lysophosphatidic acid receptor 6	10161	1.55347
Ifitm2	interferon induced transmembrane protein 2	10581	2.79708
Ncoa7	nuclear receptor coactivator 7	135112	1.52117
path_num	39	path_term	HALLMARK_PI3K_AKT_MTOR_SIGNALING	number_of_genes	99	number_hot_genes	4	Pvalue	0.9647
Smad2	SMAD family member 2	4087	1.51086
Plcg1	phospholipase C, gamma 1	5335	1.47433
Pik3r3	phosphatidylinositol 3 kinase, regulatory subunit, polypeptide 3 (p55)	8503	2.32024
Plcb1	phospholipase C, beta 1	23236	2.18107
path_num	29	path_term	HALLMARK_MITOTIC_SPINDLE	number_of_genes	193	number_hot_genes	8	Pvalue	0.9905
Pkd2	polycystic kidney disease 2	5311	1.90528
Rasa1	RAS p21 protein activator 1	5921	1.58769
Sorbs2	sorbin and SH3 domain containing 2	8470	2.99247
Cdc42bpa	CDC42 binding protein kinase alpha	8476	1.59686
Dock4	dedicator of cytokinesis 4	9732	2.75833
Kifap3	kinesin-associated protein 3	22920	2.09949
Rab3gap1	RAB3 GTPase activating protein subunit 1	22930	1.35181
Rabgap1	RAB GTPase activating protein 1	23637	1.47807
path_num	32	path_term	HALLMARK_MYC_TARGETS_V2	number_of_genes	55	number_hot_genes	1	Pvalue	0.9906
Las1l	LAS1-like (S. cerevisiae)	81887	2.31224
path_num	35	path_term	HALLMARK_OXIDATIVE_PHOSPHORYLATION	number_of_genes	185	number_hot_genes	7	Pvalue	0.9943
Slc25a4	solute carrier family 25 (mitochondrial carrier, adenine nucleotide translocator), member 4	291	2.39669
Atp6v1e1	ATPase, H+ transporting, lysosomal V1 subunit E1	529	1.54019
Bax	BCL2-associated X protein	581	1.69247
Gpx4	glutathione peroxidase 4	2879	2.17256
Oat	ornithine aminotransferase	4942	2.05845
Iscu	IscU iron-sulfur cluster scaffold homolog (E. coli)	23479	1.91346
Atp6v1d	ATPase, H+ transporting, lysosomal V1 subunit D	51382	1.41424
path_num	17	path_term	HALLMARK_G2M_CHECKPOINT	number_of_genes	186	number_hot_genes	7	Pvalue	0.9946
Ccnd1	cyclin D1	595	2.14442
Cdkn2c	cyclin-dependent kinase inhibitor 2C (p18, inhibits CDK4)	1031	2.01862
Efna5	ephrin A5	1946	4.73505
Orc5	origin recognition complex, subunit 5	5001	1.52001
Tle3	transducin-like enhancer of split 3, homolog of Drosophila E(spl)	7090	2.25083
Sap30	sin3 associated polypeptide	8819	1.89298
Bub3	budding uninhibited by benzimidazoles 3 homolog (S. cerevisiae)	9184	1.53707
path_num	12	path_term	HALLMARK_E2F_TARGETS	number_of_genes	195	number_hot_genes	7	Pvalue	0.9967
Cdkn2a	cyclin-dependent kinase inhibitor 2A	1029	2.03607
Cdkn2c	cyclin-dependent kinase inhibitor 2C (p18, inhibits CDK4)	1031	2.01862
Nap1l1	nucleosome assembly protein 1-like 1	4673	1.74541
Ppm1d	protein phosphatase 1D magnesium-dependent, delta isoform	8493	1.77514
Rnaseh2a	ribonuclease H2, large subunit	10535	1.42637
Paics	phosphoribosylaminoimidazole carboxylase, phosphoribosylaminoribosylaminoimidazole, succinocarboxamide synthetase	10606	1.91416
Brms1l	breast cancer metastasis-suppressor 1-like	84312	2.22407
path_num	42	path_term	HALLMARK_SPERMATOGENESIS	number_of_genes	126	number_hot_genes	3	Pvalue	0.9983
Rad17	RAD17 homolog (S. pombe)	5884	1.53783
Spata6	spermatogenesis associated 6	54558	1.74666
Jam3	junction adhesion molecule 3	83700	1.85898
path_num	27	path_term	HALLMARK_KRAS_SIGNALING_DN	number_of_genes	193	number_hot_genes	6	Pvalue	0.9988
Edn1	endothelin 1	1906	3.61948
Nr4a2	nuclear receptor subfamily 4, group A, member 2	4929	2.83376
Sgk1	serum/glucocorticoid regulated kinase 1	6446	4.2319
Btg2	B cell translocation gene 2, anti-proliferative	7832	1.57763
Ribc2	RIB43A domain with coiled-coils 2	26150	1.44472
Fggy	FGGY carbohydrate kinase domain containing	55277	1.79974
path_num	31	path_term	HALLMARK_MYC_TARGETS_V1	number_of_genes	179	number_hot_genes	5	Pvalue	0.9992
Nap1l1	nucleosome assembly protein 1-like 1	4673	1.74541
Psmd8	proteasome (prosome, macropain) 26S subunit, non-ATPase, 8	5714	1.4889
Rpl18	ribosomal protein L18	6141	1.41491
Vbp1	von Hippel-Lindau binding protein 1	7411	1.3839
Bub3	budding uninhibited by benzimidazoles 3 homolog (S. cerevisiae)	9184	1.53707
