# Supplementary figures and images for: BRAFV600E cooperates with CDX2 inactivation to promote serrated colorectal tumorigenesis
Source: eLife journal article supplement (doi:10.7554/elife.20331), 2017-01-10

Figure 3-figure supplement 1

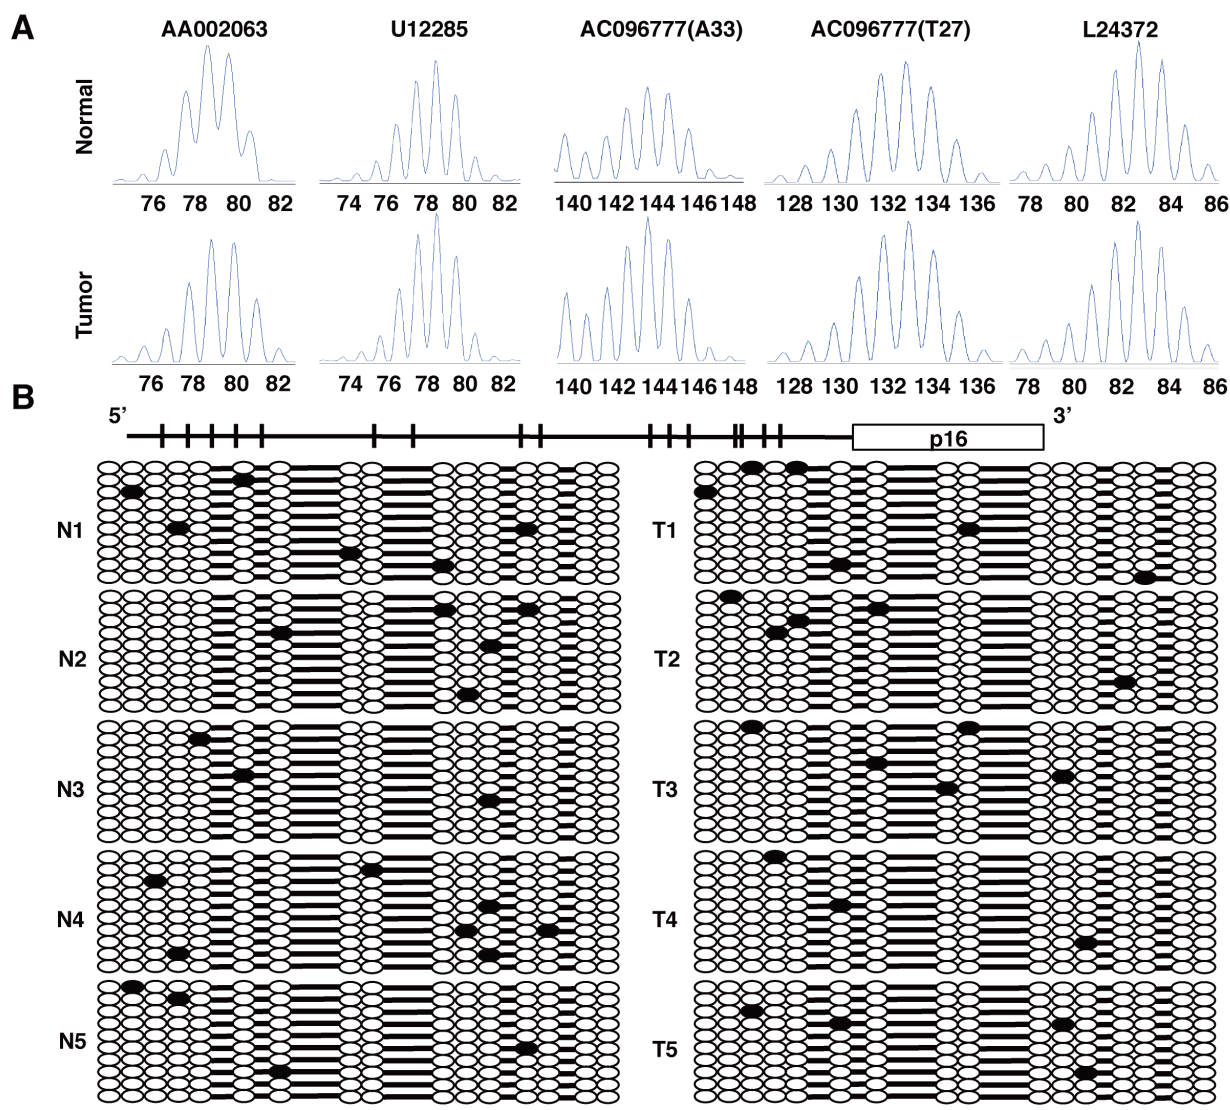

Supplement: supp [file elife-20331-supp-v1.zip]

Figure 1-figure supplement 2

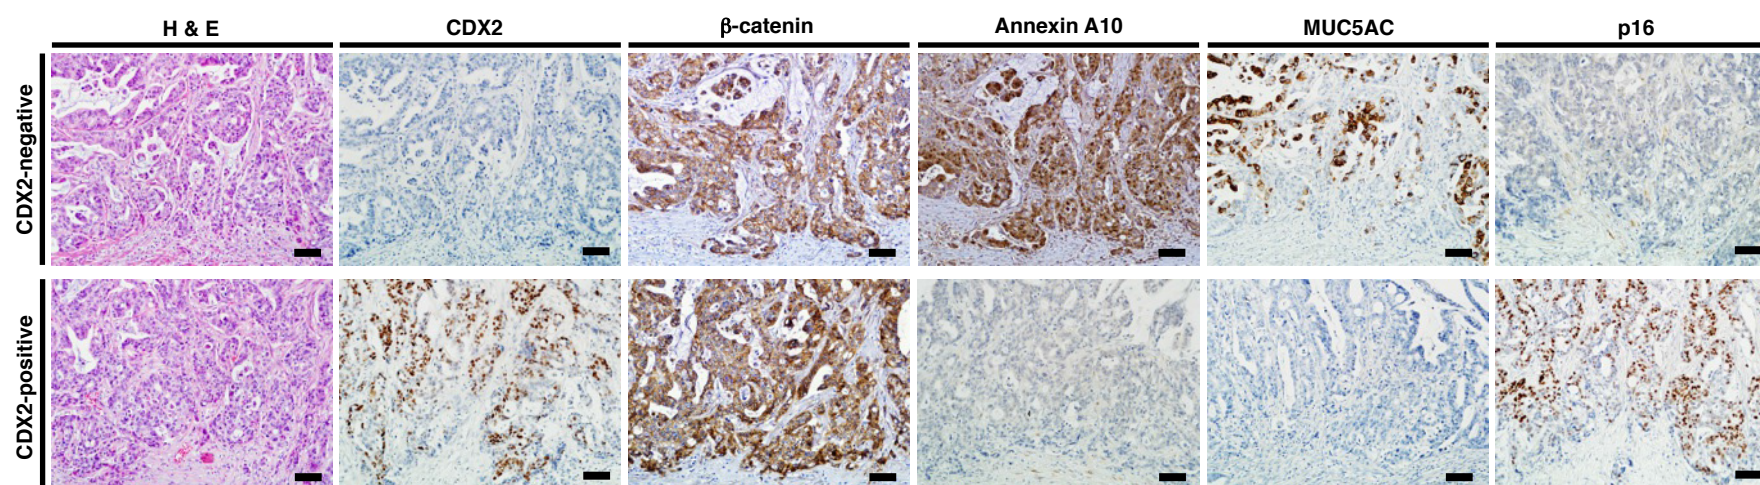

Supplement: supp [file elife-20331-supp-v1.zip]

Figure 2-figure supplement 1

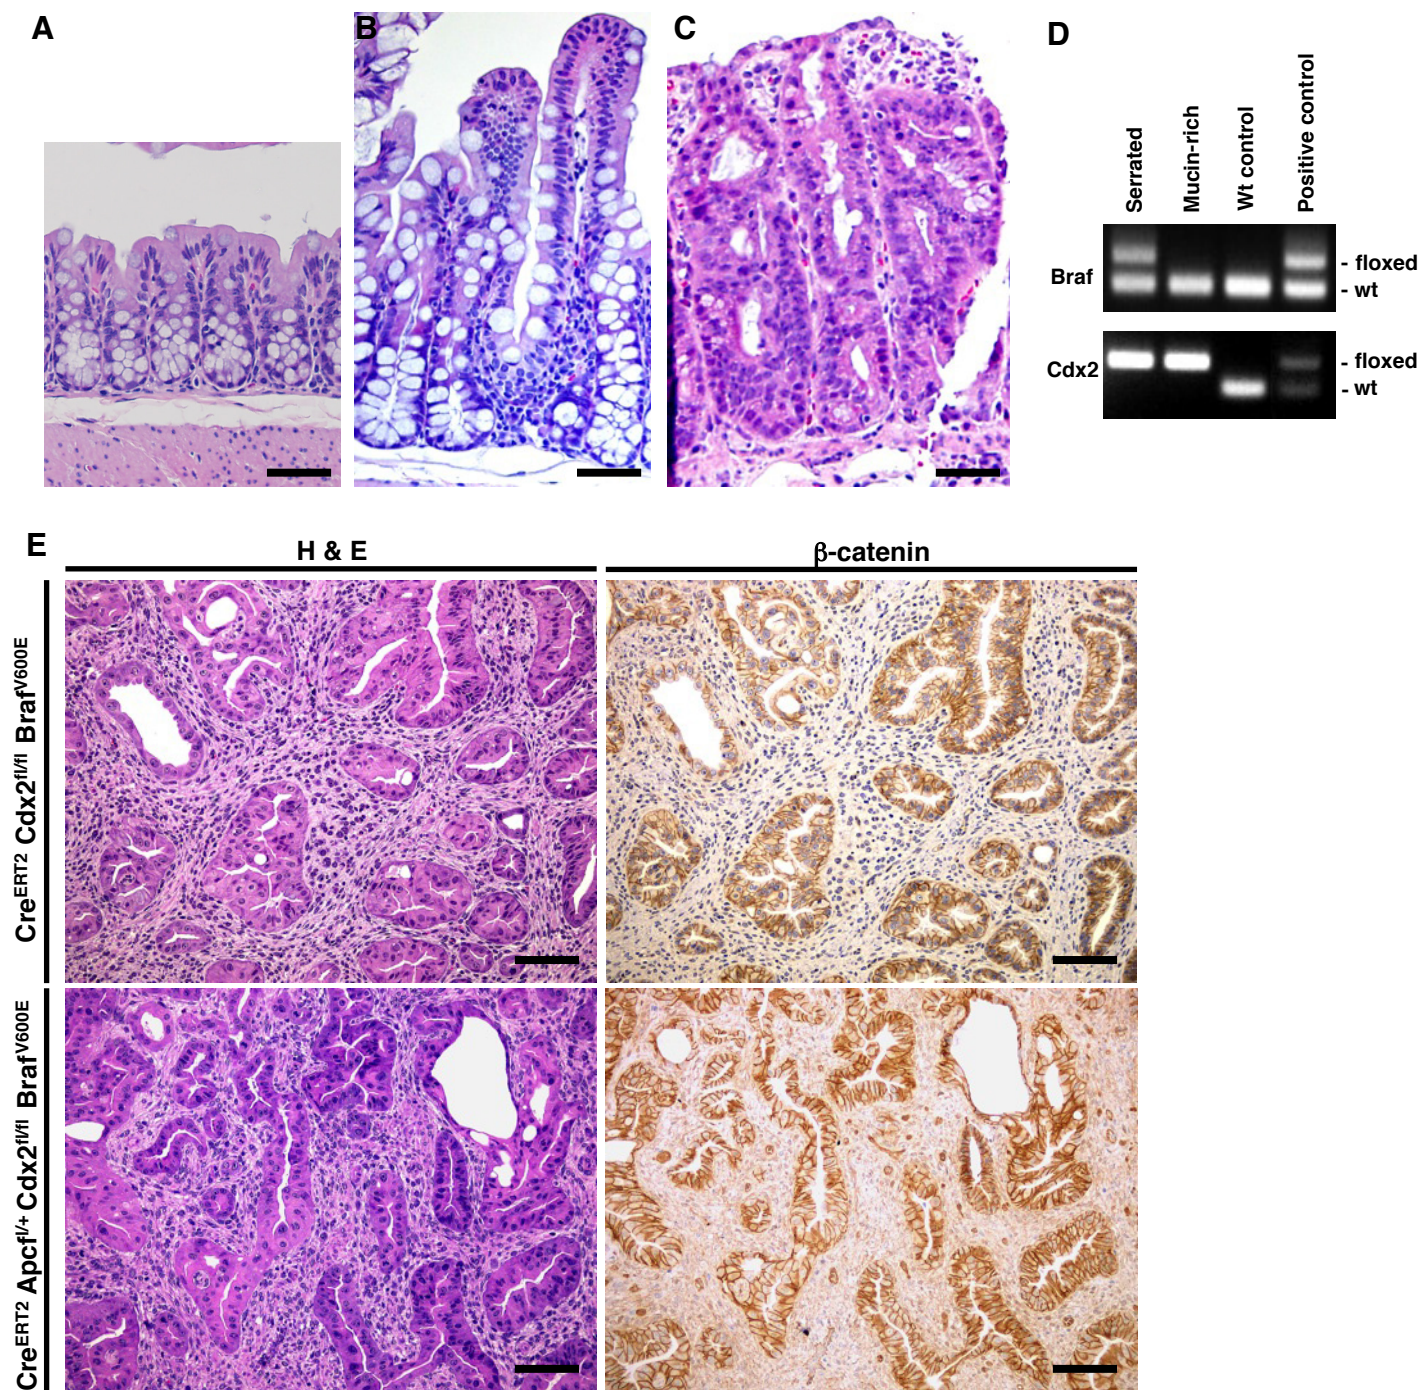

Supplement: supp [file elife-20331-supp-v1.zip]

**A**

Corpus

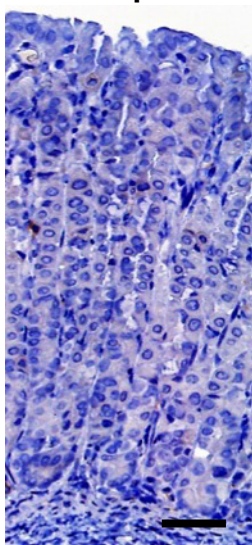

Antrum

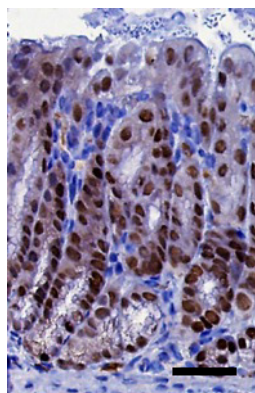

Duodenum

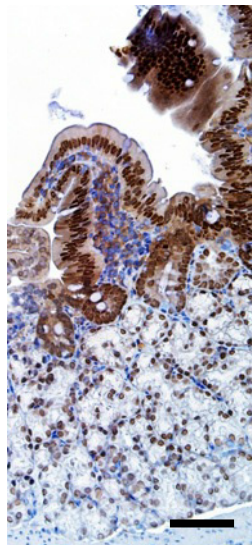

Ileum

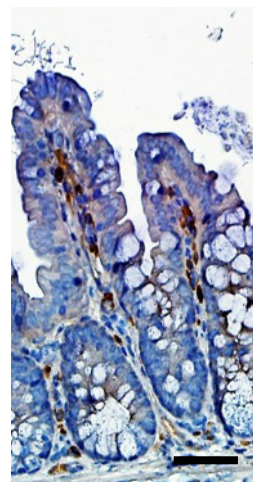

Colon

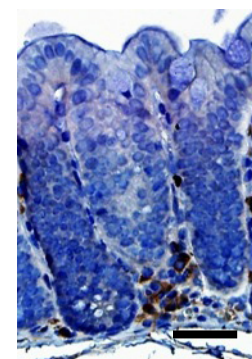

**B**

Cdx2 KO colon 7 day P.I.

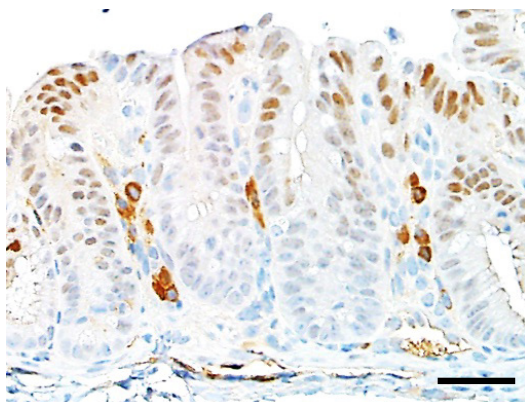

Cdx2 KO colon 21 day P.I.

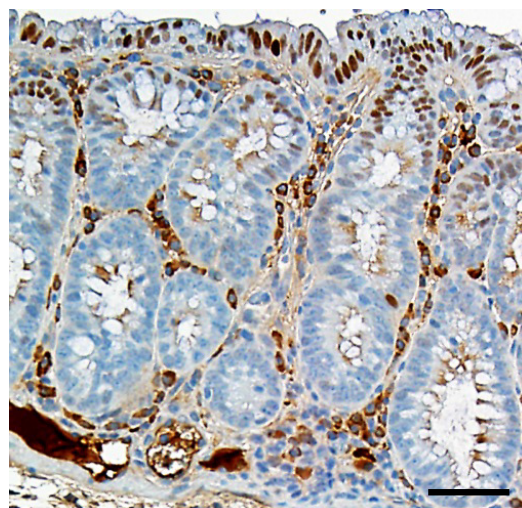

Supplement: supp [file elife-20331-supp-v1.zip]

## Normal colon

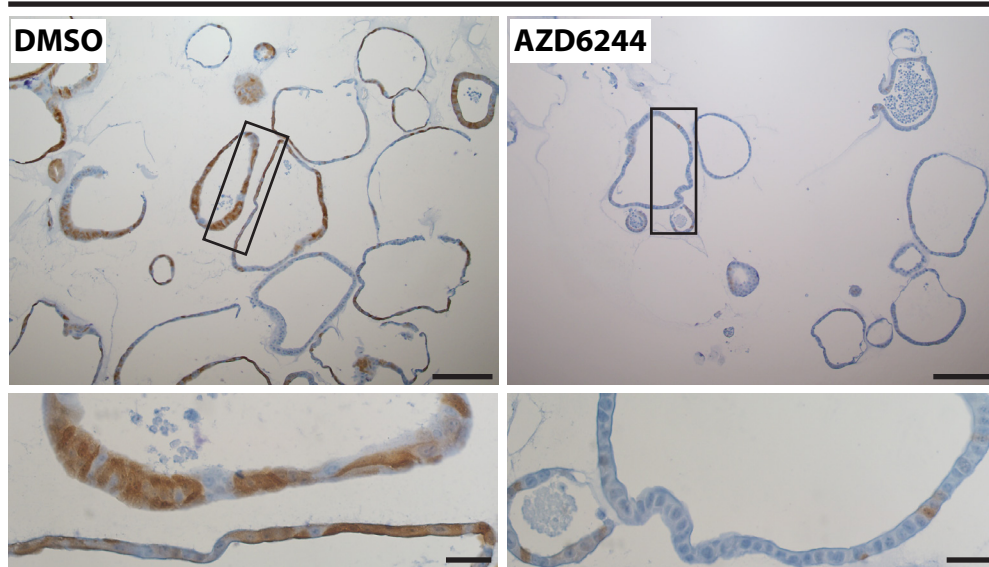 $Cdx2^{-/-}$ 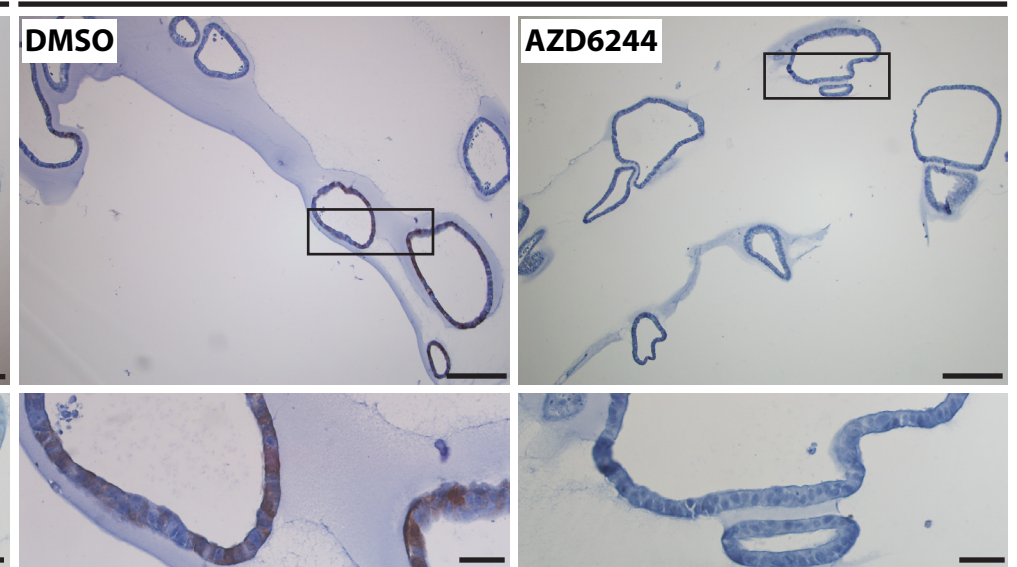 $Braf^{V600E}$ 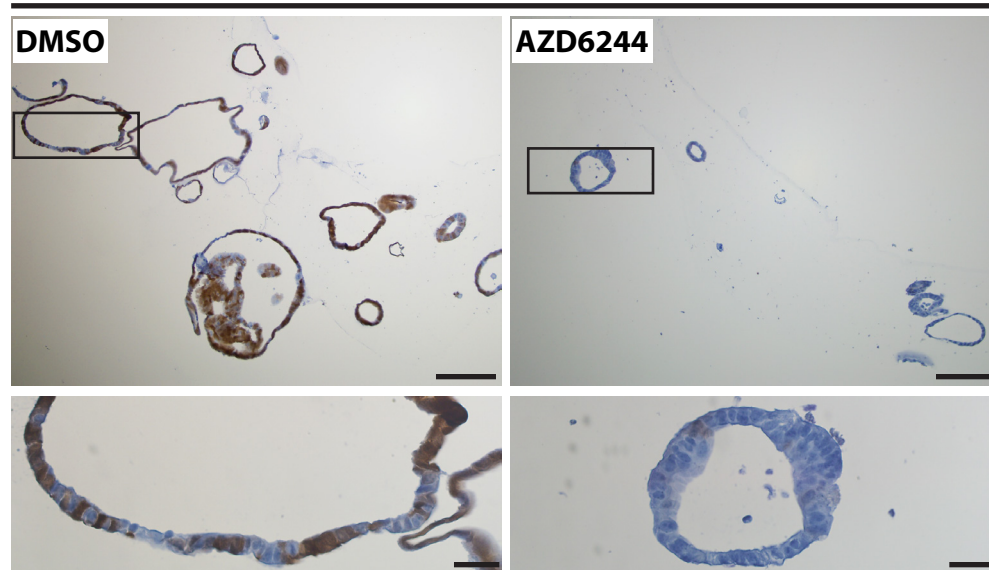 $Cdx2^{-/-} Braf^{V600E}$ 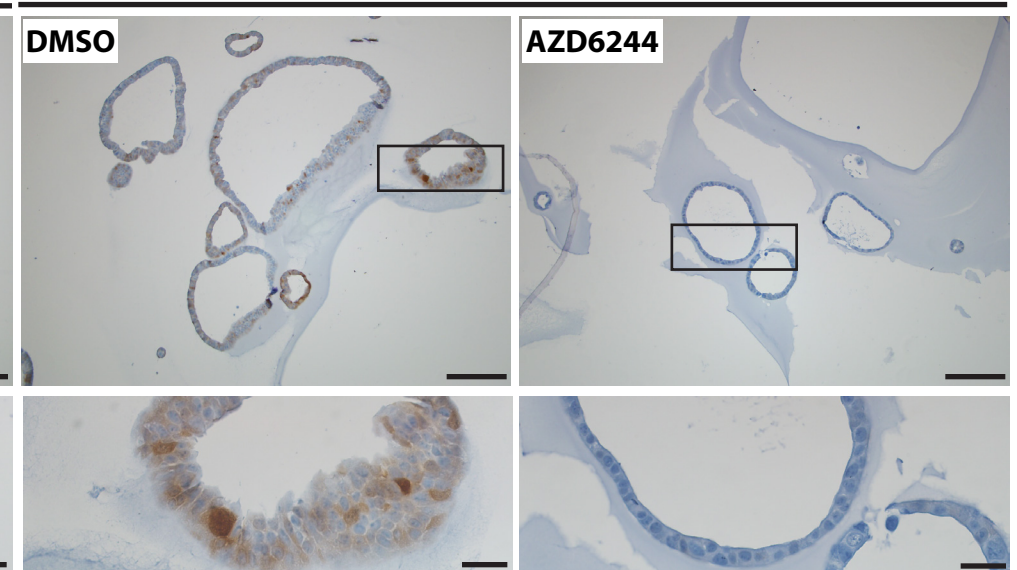

Supplement: supp [file elife-20331-supp-v1.zip]
